1 **Title**

2 *TWIST1* controls cellular senescence and energy metabolism in mesenchymal stem cells

3

4 **Author names and affiliations**

5 Chantal Voskamp<sup>1</sup>, Laura A. Anderson<sup>1</sup>, Wendy J. L. M. Koevoet<sup>2</sup>, Sander Barnhoorn<sup>3</sup>, Pier G.

6 Mastroberardino<sup>3</sup>, Gerjo J.V.M. van Osch<sup>1,2</sup>, Roberto Narcisi<sup>1</sup>

7

8 1 Department of Orthopaedics, Erasmus MC, University Medical Center, 3015 CN Rotterdam, the

9 Netherlands

10 2 Department of Otorhinolaryngology, Erasmus MC, University Medical Center, 3015 CN Rotterdam,

11 the Netherlands

12 3 Departments of Molecular Genetics, Erasmus MC, University Medical Center, 3015 CN Rotterdam,

13 the Netherlands

14

15 **Contact corresponding author**

16 Roberto Narcisi

17 Department of Orthopaedics, Erasmus MC, 3015 CN Rotterdam, the Netherlands

18 Email: [r.narcisi@erasmusmc.nl](mailto:r.narcisi@erasmusmc.nl)

19 Tel.: +31-10-7044626

20

21 **Abstract**

22 Mesenchymal stem cells (MSC) are promising cells for regenerative medicine therapies, because they  
23 can differentiate towards multiple cell lineages. However, heterogeneity in differentiation capacity is  
24 one of the main drawbacks that limit their use clinically. Differences in the occurrence of cellular  
25 senescence and in the expression of the senescence associated secretory phenotype (SASP) in MSC  
26 populations contribute to their heterogeneity. Here, we show the involvement of *TWIST1* expression  
27 in the regulation of MSC senescence, demonstrating that silencing of *TWIST1* in MSCs increased the  
28 occurrence of senescence. These senescent MSCs had a SASP that was different from irradiation-  
29 induced senescent MSCs. In addition, metabolic evaluation performed by the Seahorse XF apparatus  
30 showed that both *TWIST1* silencing-induced and irradiation-induced senescent MSCs had a higher  
31 oxygen consumption compared to control MSCs, while *TWIST1* silencing-induced senescent MSCs  
32 had a low extracellular acidification rate compared to the irradiation-induced senescent MSCs.  
33 Overall, our data indicate how *TWIST1* regulation influences senescence in human MSCs and that  
34 *TWIST1* silencing-induced senescence is characterized by a specific expression of the SASP and the  
35 metabolic state.

36

37 **Keywords:** TWIST1, mesenchymal stem cells, cellular senescence, SASP, metabolism

38

## 39 Introduction

40 Regenerative medicine strategies aim to regenerate tissues that have been damaged by  
41 injury or pathology. A promising cell source for regenerative medicine therapies is the multipotent  
42 progenitor cell referred to as mesenchymal stem cell (MSC). MSCs have the capacity to self-renew,  
43 and to differentiate towards multiple lineages (Pittenger et al., 1999). MSCs can be isolated from  
44 several tissues such as the bone marrow (Haynesworth et al., 1992; Pittenger et al., 1999), umbilical  
45 cord blood (Erices et al., 2000; Romanov et al., 2003), or adipose tissue (Halvorsen et al., 2000; Zuk et  
46 al., 2001). However, a limitation that hinders the clinical use of MSCs is their inter- and intra- donor  
47 variation in differentiation capacity. This heterogeneity includes the occurrence of cellular  
48 senescence (Li et al., 2017). Cellular senescence is an irreversible state in which cells undergo  
49 permanent cell cycle arrest, while the cells are still metabolically active and can secrete pro-  
50 inflammatory factors. These secreted factors are named the senescence-associated secretory  
51 phenotype (SASP) (Lunyak et al., 2017). The occurrence of the SASP is linked to the metabolic state of  
52 the cell (Dörr et al., 2013; Wiley et al., 2016). Glycolysis, which breaks down glucose into pyruvate,  
53 ATP and NADH, has been demonstrated to be increased in senescent cells (Bittles and Harper, 1984;  
54 James et al., 2015). In addition, senescent fibroblasts can have an impaired mitochondrial  
55 metabolism (Wiley et al., 2016).

56 Cellular senescence has been shown to reduce the differentiation capacity of umbilical cord-  
57 derived MSCs (Cheng et al., 2011) and could also be unsafe for regenerative medicine strategies,  
58 since senescent MSCs can promote tumor formation (Hochane et al., 2017; Li et al., 2015). In  
59 addition senescent cells transplanted in the knee joint of mice can induce an osteoarthritis-like  
60 phenotype showing reduced cartilage content, osteophyte formation and subchondral bone  
61 structure alterations (Xu et al., 2017). Safe and reproducible clinical use of MSCs requires a better  
62 understanding of the molecular mechanisms behind cellular senescence and their SASP profile.

63 Previously, we and others observed that MSC expansion was associated with the expression  
64 of the transcription factor *TWIST1* (Isenmann et al., 2009; Narcisi et al., 2015; Voskamp et al., 2020).

65 Moreover, TWIST1 can regulate the expression of cellular senescence marker P21 in hypoxic MSC  
66 cultures (Tsai et al., 2011). To better understand the molecular mechanism behind cellular  
67 senescence in MSCs, we investigated how *TWIST1* expression regulates cellular senescence and their  
68 SASP expression. In this study we show that *TWIST1* overexpression in MSCs inhibited cellular  
69 senescence, while silencing of *TWIST1* induced cellular senescence. In addition, we show that *TWIST1*  
70 can modulate the SASP and bioenergetic profile in senescent MSCs. These results provide novel  
71 molecular insights in SASP and metabolism regulation and suggest that TWIST1 could be a target to  
72 modulate cellular senescence.

73

74

## 75 **Results and Discussion**

76

### 77 ***TWIST1* expression is negatively associated with cellular senescence in MSCs**

78 To determine whether *TWIST1* expression is involved in cellular senescence in human MSCs, we  
79 started by analyzing its expression in senescent MSCs. Cellular senescence was induced in MSCs by  
80 gamma irradiation (20 Gy) and confirmed by SA- $\beta$ -gal staining (**Figure 1A**). *TWIST1* expression was  
81 significantly reduced in irradiated-induced senescent MSCs compared to mock irradiated MSCs  
82 (**Figure 1B**;  $p=0.022$ ), indicating that *TWIST1* expression is negatively associated with cellular  
83 senescence in MSCs. Following this observation, we hypothesized that high expression of *TWIST1* is  
84 able to delay the entrance into the senescence state during passaging *in vitro*. To test this hypothesis,  
85 *TWIST1* was overexpressed in MSCs by a lentiviral-based approach. Transduction was determined by  
86 the percentage of GFP positive cells (>65% transduced cells; **Fig EV1**) and overexpression confirmed  
87 by qPCR analysis (103-fold increase compared to empty vector control; **Figure 1C**). Control and  
88 *TWIST1* overexpressing MSCs were then serially passaged for 11 days, followed by SA- $\beta$ -gal analysis  
89 (**Fig EV2**). *TWIST1* overexpressing MSCs showed 15% SA- $\beta$ -gal low positive cells and 0.4% SA- $\beta$ -gal  
90 high positive cells, while empty vector control cells had 52% SA- $\beta$ -gal low positive cells ( $p<0.001$ ) and

91 2% high positive cells ( $p=0.052$ ; **Figure 1D**). These results suggest that *TWIST1* expression can inhibit  
92 cellular senescence in MSC.

93 It has been reported that *TWIST1* expression suppresses senescence in lung and breast cancer cells  
94 (Burns et al., 2013; Nayak et al., 2017; Tran et al., 2012). In MSCs, a high *TWIST1* expression has been  
95 associated with rapid cell growth and a high proliferation capacity of MSCs (Boregowda et al., 2016;  
96 Isenmann et al., 2009; Voskamp et al., 2020). Our data indicate a direct link between *TWIST1*  
97 expression and cellular senescence in MSCs.

98

99 ***TWIST1* silencing induces cellular senescence with a specific senescence associated secretory**  
100 **phenotype in MSCs.**

101 To elucidate whether cellular senescence can be induced via *TWIST1* modulation, *TWIST1* expression  
102 was silenced in MSCs using a siRNA approach. After 24 h of *TWIST1* siRNA treatment (si*TWIST1*-  
103 MSCs) *TWIST1* mRNA levels were 53% reduced ( $p=0.035$ ) compared to scramble controls (**Fig EV3A**)  
104 and after 4 passages si*TWIST1*-MSCs showed 64% knockdown of *TWIST1* mRNA levels ( $p<0.001$ ; **Fig**  
105 **2A**). After 4 passages, *TWIST1* silencing increased the expression of cell cycle inhibitors and  
106 senescence markers *P16* (6.5-fold,  $p<0.001$ ) and *P21* (2.1-fold,  $p=0.060$ ; **Fig 2B**). The expression of  
107 *P16* was already induced after 24 h of *TWIST1* silencing (1.8-fold;  $p=0.015$ ; **Fig EV3B**). No differences  
108 in *P21* expression were observed after 24 h of *TWIST1* silencing (**Fig EV3C**). In addition, after 4  
109 passages, *TWIST1* silencing increased SA- $\beta$ -gal activity in MSCs (**Fig 2C and Fig EV2E**) and decreased  
110 cell expansion (**Fig 2D**), overall indicating that *TWIST1* knockdown induces senescence growth arrest.  
111 Since the SASP can drive chronic inflammation and thereby contribute to age-related diseases such  
112 as osteoarthritis and cancer (reviewed in: Loeser et al., 2016; Zhu et al., 2014), we determined the  
113 expression of the SASP-related genes *IL6*, *IL10*, *IL1B*, *MMP3*, *IL8*, *CCL2* and *VEGFA* in si*TWIST1*-MSCs.  
114 si*TWIST1*-MSCs expressed higher levels of *CCL2* and *IL1B* compared to control condition (3.3-fold  
115  $p=0.008$ , 7.4-fold  $p=0.008$ , respectively; **Fig 2E**). Interestingly, the expression of *IL6*, *IL10*, *MMP3* and

116 *VEGFA* were not significantly affected by *TWIST1* silencing, and *IL8* was even significantly decreased  
117 ( $p=0.291$ ,  $p=0.077$ ,  $p=0.087$ ,  $p=0.912$ ,  $p<0.001$ , respectively; **Fig 2E**). These results indicate that  
118 senescence was induced in MSCs by *TWIST1* knockdown, but generating a 'non-classical' SASP  
119 profile.

120 The mechanism by which the SASP related genes are regulated in senescent cells is not fully  
121 understood. It is, however, known that mitochondria can induce SASP expression via increased  
122 reactive oxygen species (ROS) and JNK activation (Vizioli et al., 2020). Interestingly, cellular  
123 senescence with a different SASP profile has previously been reported in mitochondrial dysfunctional  
124 senescence (MiDAS) (Wiley et al., 2016). Cells with MiDAS appeared to have a SASP expression  
125 profile similar to si*TWIST1*-MSCs: they did not express *IL-6* and *IL8* and had an increased expression  
126 of *IL-10* (Wiley et al., 2016). In addition, *TWIST1* downregulation was demonstrated to promote  
127 mitochondrial dysfunction in lung cancer cells (Seo et al., 2014) and adipocytes (Lu et al., 2018).  
128 Overall, these data suggest that *TWIST1* silencing might induce cellular senescence in MSCs via  
129 mitochondrial dysfunction.

130

### 131 ***TWIST1* silencing alters MSC bioenergetics**

132 To study if *TWIST1* silencing-induced senescence is induced via mitochondrial dysfunction, we  
133 determined the bioenergetic profile in si*TWIST1*-MSCs using a Seahorse XF-24 Extracellular Flux  
134 Analyzer. We measured the oxygen consumption rate (OCR) reflecting cellular respiration followed  
135 by subsequent measurement after injection of mitochondrial toxins: oligomycin, FCCP and antimycin  
136 A (see materials and methods and **Fig EV4A**). We first identified the optimal cell density (30,000  
137 cells/well; **Fig EV4B**) and the ideal concentration of FCCP (2.0  $\mu$ M; **Fig EV4C**) to detect OCR in human  
138 MSCs. Then, we observed a significant increase in basal respiration levels in si*TWIST1*-MSCs  
139 compared to scramble controls ( $p=0.011$ ; **Fig 3A-C**). In addition, si*TWIST1*-MSCs showed a higher  
140 maximum OCR, proton leak, Adenosine Tri-Phosphate (ATP) production and spare respiratory

141 capacity compared to scramble control cells ( $p=0.001$ ,  $p=0.006$ ,  $p=0.002$ ,  $p=0.002$ ; **Fig 3D-G**). No  
142 differences in non-mitochondrial respiration were observed between scramble control cells and  
143 siTWIST1-MSCs ( $p=0.251$ ; **Fig 3H**). These data indicate that that *TWIST1* silencing induces changes in  
144 the mitochondrial function in MSCs. To determine if an increased mitochondrial respiration is specific  
145 for *TWIST1* silencing-induced senescent MSCs or whether it is common for senescent MSCs, we  
146 determined the OCR in irradiated induced senescent MSCs. Similar to *TWIST1* silencing-induced  
147 senescent MSCs, irradiation-induced senescent MSCs showed higher basal OCR, maximum OCR,  
148 proton leak, ATP production and spare respiratory capacity compared to non-irradiated control cells  
149 ( $p<0.001$ ,  $p=0.050$ ,  $p=0.019$ ,  $p<0.001$ ,  $p=0.032$ ; **Fig EV5A-F**), and no differences in non-mitochondrial  
150 respiration ( $p=0.256$ ; **Fig EV5G**). These data suggest that both *TWIST1* silencing-induced and  
151 irradiation-induced senescent MSCs have an increased OCR. Previously, cellular senescence has been  
152 associated with an increased OCR in fetal lung cells (Quijano et al., 2012). The increased OCR in  
153 senescent MSCs can be due to an increase in mitochondrial respiration or to an increase in  
154 mitochondrial mass. An increase in mitochondrial mass in senescent cells has been reported before  
155 in fibroblasts (Correia-Melo et al., 2016; Lee et al., 2002) and can increase the levels of  
156 mitochondrial-derived reactive oxygen species (ROS) which can cause an increase in proton leak  
157 (Brookes, 2005). In both *TWIST1* silencing-induced and irradiation-induced senescent MSCs we  
158 indeed observed an increased proton leak (**Fig 3** and **Fig EV5**), suggesting that the senescent MSCs  
159 have dysfunctional mitochondria. Dysfunctional mitochondria can trigger cellular senescence (Wiley  
160 et al., 2016), and removal of mitochondria in senescent cells has been shown to reduce the  
161 senescence phenotype (Correia-Melo et al., 2016), indicating that mitochondria can induce cellular  
162 senescence, but also play a key role in the maintenance of the senescence phenotype. Despite the  
163 difference in the SASP phenotype, both *TWIST1* silencing-induced and irradiation-induced senescent  
164 MSCs showed an increased mitochondrial respiration.

165

166 In addition to mitochondrial respiration, glycolysis plays an important role in MSC energy metabolism  
167 (Pattappa et al., 2011). Cellular senescence has been associated with an increased glycolytic capacity  
168 after *in vitro* expansion (Bittles and Harper, 1984). As a measure of glycolytic flux in siTWIST1-MSCs,  
169 we analyzed the extracellular acidification rate (ECAR). No significant differences in ECAR were  
170 observed between scramble control cells and siTWIST1-MSCs (**Fig 4A-C**), indicating that *TWIST1*  
171 silencing does not alter the glycolytic flux in MSCs. Irradiated MSCs had higher ECAR compared to  
172 control MSCs (**Fig EV6**), confirming earlier published data in fibroblasts (James et al., 2015). These  
173 data suggest that the glycolytic capacity is unaltered in siTWIST1-MSCs, in contrast to irradiation  
174 induced senescent MSCs. Overall, these data show that depending on the inducer of cellular  
175 senescence in MSCs, senescent MSCs can have a different bioenergetic profile.

176 In summary our study provides novel insights in the function of *TWIST1* in the regulation of cellular  
177 senescence in MSCs. Furthermore, the phenotype of these senescent cells differs from irradiation-  
178 induced senescent cells in the expression of the SASP expression and the bioenergetics (**Fig. 5**),  
179 highlighting that senescent MSCs can be heterogeneous. Besides, our results suggest that reduction  
180 of *TWIST1* expression might drive aging phenotypes of MSCs.

181



## 182 **Materials and Methods**

183

### 184 **Cell culture**

185 Mesenchymal stem cells (MSC), were isolated as previously described (Knuth et al., 2018) from  
186 leftover iliac crest bone chip material obtained from patients undergoing cleft palate reconstructive  
187 surgery (MEC-2014-16; 9-13 years old). MSCs were expanded in  $\alpha$ MEM medium (Gibco, Paisley, UK)  
188 containing 10% fetal calf serum (Gibco, selected batch 41Q2047K), 1.5  $\mu$ g/mL fungizone (Invitrogen,  
189 California), and 50  $\mu$ g/mL gentamicin (Gibco, Carlsbad, California), 0.1 mM Ascorbic acid (Sigma-  
190 Aldrich) and 1 ng/mL FGF2 (Instruchemie, Delft Zijl, The Netherlands). MSCs were cultured at a  
191 density of 2,300 cells/cm<sup>2</sup> at 37°C and 5% CO<sub>2</sub>. Cells were trypsinized and refreshed twice a week.  
192 Depending on the assay and the experimental plan, passage-3 (P3) to passage-7 (P7) cells have been  
193 used.

194

### 195 ***TWIST1* silencing**

196 To study whether silencing of *TWIST1* induced cellular senescence, MSCs in a low passage (P3-P4)  
197 were used for this experiment. MSCs were seeded at a density of 2,300 cells/cm<sup>2</sup> and cultured for 24  
198 h in standard expansion medium. Next, the cells were treated with 15 nM *TWIST1* (4390824,  
199 Ambion) or scramble (4390843, Ambion) siRNA in combination with Lipofectamine RNAMAX  
200 Transfection Reagent (1:1150; Invitrogen) and optiMEM (1:6; Gibco) or were left untreated. The  
201 treatment was repeated every 3-4 days for 13-14 days.

202

### 203 **Lentiviral constructs and virus generation**

204 To study the effect of *TWIST1* overexpression on MSC senescence, lentiviral constructs of  
205 tetracycline-inducible expression of *TWIST1* and green fluorescent protein (GFP) were used. *TWIST1*  
206 cDNA was cloned into a lentiviral construct under the control of the tetracycline operator. The GFP  
207 lentiviral vector was a gift from Marius Wernig's laboratory (Stanford School of Medicine, CA;

208 Addgene plasmid # 30130). An empty lentiviral construct was used as control. Third generation  
209 lentiviral particles with a VSV-G coat were generated in HEK293T cells. HEK293T cells were cultured  
210 in DMEM HG glutamax (Life Technologies, Paisley, UK) containing 10% fetal calf serum, 1 mM sodium  
211 pyruvate (Life Technologies, Paisley, UK) and non-essential amino acids (1:100; Life Technologies,  
212 Grand Island, USA) and seeded at Poly-L-Ornithine coated plates at a density of  $5 \times 10^6$  cells per 10  
213 cm $\emptyset$  dish. After 24 h cells were transfected with lentiviral packaging vectors PMDL (5  $\mu$ g per 10 cm $\emptyset$   
214 dish), RSV (2.5  $\mu$ g per 10cm $\emptyset$  dish) VSV- (2.5  $\mu$ g per 10 cm $\emptyset$  dish) and one of the experimental  
215 inserts; rtTA, TWIST1, GFP or an empty vector (10  $\mu$ g per 10 cm $\emptyset$  dish) using polyethylenimine  
216 (1:166). Medium was refreshed 6 h post-transfection. Viral supernatants were filtered through a 0.45  
217  $\mu$ m filter 24 h following the last medium refreshment and stored at -80°C until use.

218

### 219 **Lentiviral transduction**

220 To study whether *TWIST1* overexpression inhibited cellular senescence, MSCs in a high passage (P7)  
221 were used for this experiment. The transduction efficiency was determined in MSCs by titration of  
222 the GFP lentivirus construct using different virus concentrations, 1:1:1, 1:1:3 and 1:1:8 (GFP: rtTA:  
223 MSC expansion medium). After transduction of the cells for 16 h, cells were washed with PBS and  
224 fresh expansion medium was added with 2  $\mu$ g/ml doxycycline (Sigma Aldrich). The transduction  
225 efficiency was assessed by analysis of the percentage of GFP positive cells using fluorescent  
226 microscopy and flow cytometry. For flow cytometry analysis, GFP transduced MSCs were fixed in 2%  
227 formaldehyde (Fluka) and filtered through 70- $\mu$ M filters. Untransduced MSCs were used as a  
228 negative control. Samples were analyzed by flow cytometry using a BD Fortessa machine (BD  
229 Biosciences). The data were analyzed using FlowJo V10 software. Both fluorescent microscopy and  
230 flow cytometry showed that 65% of the cells were positive for GFP using a concentration of 1:1:1  
231 lentivirus (**Fig EV1**), indicating that the MSCs were effectively transduced.

232

### 233 **mRNA analysis**

234 For each experiment involving RNA evaluation, the medium was renewed 24 h before harvesting the  
235 cells. MSCs were washed with PBS and lysed in RLT with 1%  $\beta$ -mercaptoethanol, subsequently RNA  
236 was isolated from the cells using the RNeasy micro kit (Qiagen, Hilden, Germany) according to  
237 manufactures' instructions. cDNA was synthesized using the RevertAid First-Strand cDNA Synthesis  
238 Kit (Thermo Fisher Scientific, Vilnius, Lithuania). Real-time polymerase chain reactions were  
239 performed with TaqMan Universal PCR MasterMix (Applied Biosystems) or SYBR Green MasterMix  
240 (Fermentas) using a CFX96TM PCR detection system (Bio-Rad). Primers are listed in **Table EV1** and  
241 housekeeping genes *GAPDH*, *HPRT1* and *RPS27A* were chosen for their stability in MSCs and the best  
242 housekeeping index (BHI) was calculated according to the  $(Ct^{GAPDH} * Ct^{HPRT} * Ct^{RPS27A})^{1/3}$  formula. The  
243 relative gene expression was calculated with the  $\Delta\Delta Ct$  method.

244

#### 245 **Senescence-associated beta-galactosidase staining**

246 Cells were washed twice with PBS and fixed with 0.5% glutaraldehyde and 1% formalin in Milli-Q  
247 water. Then the cells were washed with Milli-Q water and incubated for 24 h at 37°C with freshly  
248 made X-gal solution (0.5% X-gal, 5 mM potassium ferricyanide, 5 mM potassium ferrocyanide, 2mM  
249 MgCl<sub>2</sub>, 150mM NaCl, 7mM C<sub>6</sub>H<sub>8</sub>O<sub>7</sub>, 25mM Na<sub>2</sub>HPO<sub>4</sub>). Cells were counterstained with  
250 pararosaniline (1:25 in Milli-Q water) and detected with bright field microscopy. For each condition  
251 two independent researchers blinded to the experimental plan, scored at least 300 cells as  
252 'negative', 'low positive', or 'high positive' (**Fig EV2**).

253

#### 254 **Bioenergetics Assays**

255 Mitochondrial respiration was measured as oxygen consumption rate (OCR) using a XF-24  
256 Extracellular Flux Analyzer (Seahorse Bioscience) as previously described (Milanese et al., 2019).  
257 MSCs were seeded at a density of  $3 \times 10^4$  cells/well on Seahorse plates. Optimal cell densities were  
258 determined experimentally to ensure a proportional response to FCCP (**Fig EV4B-C**). 24 h after cell  
259 seeding, the medium was changed to unbuffered DMEM (XF Assay Medium-Agilent Technologies,

260 Santa Clare, Ca, USA) with 2 mM glutamine, 10 mM glucose and 1 mM sodium pyruvate and  
261 incubated 1 h at 37° C in the absence of CO<sub>2</sub>. Three baseline measurements were performed,  
262 followed by subsequent measurements after injections of mitochondrial toxins 1.0 μM oligomycin  
263 (ATP-synthase inhibitor), 2.0 μM fluoro-carbonyl cyanide phenylhydrazone (FCCP, oxidative  
264 phosphorylation uncoupler) and 1 μM antimycin A (complex III inhibitor). Medium and reagents were  
265 adjusted to pH 7.4 according to manufacturer's procedure. Non-mitochondrial respiration, basal  
266 respiration, proton leak, ATP production, maximal respiration and spare capacity were calculated as  
267 indicated in **Fig EV4A**: The non-mitochondrial respiration was defined as the average OCR values  
268 after antimycin A injection; basal respiration was calculated as difference between basal respiration  
269 and respiration measured after antimycin A; proton leak was calculated as difference between  
270 respiration measured after oligomycin and respiration measured after antimycin A; ATP production  
271 was calculated as difference between baseline respiration and respiration measured after oligomycin  
272 injection; maximal respiration was calculated as difference between respiration after FCCP and  
273 respiration measured after antimycin A; spare capacity was defined as difference between  
274 respiration after FCCP and baseline respiration.

275

#### 276 **Data analysis**

277 Results are statistically analyzed using PSAW statistics 20 software (SPSS Inc., Chicago, IL, USA). The  
278 normal distribution of the data was determined using the Kolmogorov-Smirnov test. When necessary  
279 the data was a log transformed to meet the normal distribution criteria. An unpaired t-test or a linear  
280 mixed model was applied, in this model the conditions were considered as fixed parameters and the  
281 donors as random factor. P-values less than 0.05 are considered as statistically significant. The grand  
282 mean is determined by calculating the mean of the donor means with 2-6 replicates per donor.

283

284 **Acknowledgements**

285 The authors would like to thank Andrea Lolli for advice on the *TWIST1* silencing protocol, Eric Farrell  
286 and Janneke Witte-Bouma for access to their source of MSCs, Nicole Kops and Arielle Molina Rakos  
287 for technical assistance with the senescence-associated beta-galactosidase staining and  
288 quantification, the Marius Wernig's laboratory (Stanford School of Medicine, CA) for providing the  
289 GFP overexpression construct and the lentiviral packaging constructs and the FACS sorting facility at  
290 the Erasmus MC for support with the BD Fortessa machine. This research was financially supported  
291 by the Dutch Arthritis Society (ReumaNederland; 16-1-201) and by a TTW Perspectief grant from  
292 NWO (William Hunter Revisited; P15-23). This study is part of the Medical Delta RegMed4D program  
293 and the Erasmus Postgraduate School Molecular Medicine.

294

295 **Author Contribution**

296 CV: conception and design, collection of data, data analysis and interpretation, manuscript writing  
297 and final approval of manuscript. LA: design, collection of data, data analysis and interpretation of  
298 the cellular senescence analysis experiments, manuscript editing and final approval of manuscript.  
299 WK: collection of data, data analysis, manuscript editing and final approval of manuscript. SB: design,  
300 collection of data, data analysis and interpretation of the metabolic experiments and manuscript  
301 editing and final approval of manuscript. PM: conception and design and data interpretation of the  
302 metabolic experiments, manuscript editing and final approval of manuscript. GO and RN: conception  
303 and design, data analysis and interpretation, manuscript editing and final approval of manuscript.

304

305 **Conflict of interest**

306 The authors declare that they have no conflict of interest.

307

308 **Data availability**

309 All dataset generated for this study are available on request to the corresponding author.

310 **Figure legends**

311 **Figure 1 – *TWIST1* expression is negatively associated with senescence-associated  $\beta$ -galactosidase.**

312 (A) Representative images of senescence-associated  $\beta$ -galactosidase (SA- $\beta$ -gal) staining counter  
313 stained with pararosaniline of MSCs 7 days after gamma irradiation with 0 or 20 Gy. Scale bar  
314 represent 100  $\mu$ m. N=9, 3 donors with 3 replicates per donor. (B) *TWIST1* mRNA levels of MSCs 7  
315 days after gamma irradiation with 0 or 20 Gy. Data show individual data points and grand mean with  
316 N=8 (0 Gy) or N=9 (20 Gy), 3 donors with 2-3 replicates per donor, linear mixed model. (C) *TWIST1*  
317 mRNA levels of MSCs transduced with an empty overexpression lentiviral construct (Control) or a  
318 *TWIST1* overexpression lentiviral construct (*TWIST1*) after 11 days of expansion. Data show individual  
319 data points and grand mean with N=6, 2 donors with 3 replicates per donor, linear mixed model. (D)  
320 Left panel, representative images of SA- $\beta$ -gal staining counter stained with pararosaniline of MSCs  
321 transduced with an empty overexpression lentiviral control construct (Empty) or a *TWIST1*  
322 overexpression lentiviral construct (*TWIST1*) after 11 days of expansion. Right panel, quantification of  
323 SA- $\beta$ -gal staining. Bars show grand mean of percentage of SA- $\beta$ -gal negative, low positive and high  
324 positive cells. N=4, 2 donors with 2 replicates per donor, linear mixed model.

325

326 **Figure 2 – *TWIST1* silencing induces cellular senescence in MSCs with a specific SASP mRNA**

327 **expression profile.** (A) *TWIST1* mRNA levels in MSCs treated for 4 passages with scramble siRNA

328 (Scramble) or siRNA against *TWIST1* (si*TWIST1*). N=9, 3 donors with 3 replicates per donor, linear

329 mixed model. (B) *P16* and *P21* mRNA levels in MSCs treated for 4 passages with scramble siRNA

330 (Scramble) or siRNA against *TWIST1* (si*TWIST1*). N=9, 3 donors with 3 replicates per donor, linear

331 mixed model. (C) Quantification of senescence associated beta galactosidase (SA- $\beta$ -gal) staining

332 based on intensity (negative, low positive and high positive) of MSCs treated for 4 passages with

333 scramble siRNA (Scramble) or siRNA against *TWIST1* (si*TWIST1*). N=6, 3 donors with 2 replicates per

334 donor, linear mixed model. (D) Cell number data during expansion of MSCs treated with scramble

335 siRNA (Scramble) or siRNA against TWIST1 (siTWIST1) at day 0, 3, 7, 10 and 14 of treatment, N=3  
336 donors. (E) *IL6*, *IL10*, *IL1B*, *MMP3*, *IL8*, *CCL2* and *VEGFA* mRNA levels in MSCs treated for 4 passages  
337 with scramble siRNA (Scramble) or siRNA against TWIST1 (siTWIST1). N=9, 3 donors with 3 replicates  
338 per donor, linear mixed model. Graphs show individual data points and grand mean.

339

340 **Figure 3 – Increased oxygen consumption rate (OCR) in TWIST1 silenced MSCs.** (A-B) Graph shows  
341 the OCR in MSCs treated with a scramble or TWIST1 siRNA at basal level and after addition of  
342 oligomycin, FCCP and antimycin A in two different donors MSC-6 (A) and MSC-7 (B). Values represent  
343 mean with SD, N=3-5 replicates per donor. (C-H) Graphs show calculated values for basal OCR (C),  
344 maximum OCR (D), proton leak (E), ATP production (F), spare capacity (G) and non-mitochondrial  
345 respiration (H) in MSCs treated with scramble or TWIST1 siRNA. N=6-9, 2 donors with 3-5 replicates  
346 per donor, linear mixed model. Graphs show individual data points and grand mean.

347

348 **Figure 4 –TWIST1 silencing did not increases extracellular acidification rate (ECAR) in MSCs.** (A-B)  
349 Graph shows the ECAR in MSCs treated with a scramble or TWIST1 siRNA at basal level and after  
350 addition of oligomycin, FCCP and antimycin A in two different donors MSC-6 (A) and MSC-7 (B).  
351 Values represent mean with SD, N=3-5 replicates per donor. (C) Graphs show ECAR values for basal  
352 OCR and maximum OCR in MSCs treated with scramble or TWIST1 siRNA. N=6-9, 2 donors with 3-5  
353 replicates per donor, linear mixed model. Graphs show individual data points and grand mean.

354

355 **Figure 5 - Schematic overview of the characteristics of TWIST1 silencing-induced senescence and**  
356 **irradiation-induced senescence.** Both TWIST1 silencing-induced and irradiation-induced senescence  
357 stimulated senescence-associated beta-galactosidase (SA- $\beta$ -gal) activity in MSCs, decreased their  
358 expansion rate and induced high levels of *P16* and *P21* mRNA. TWIST1 silencing-induced senescence,



359 however, increased oxygen respiration in MSCs, increased the expression of the SASP related genes  
360 *CCL2* and *IL1B*, and lack the expression of *IL8*, *IL6*, *IL10*, *MMP3* and *VEGFA*. Irradiation-induced  
361 senescent MSCs showed increased oxygen respiration, increased glycolytic flux and classical SASP  
362 expression.

363

## 364 **References**

365 Bittles, A.H., and Harper, N. (1984). Increased glycolysis in ageing cultured human diploid fibroblasts.  
366 *Biosci Rep* 4, 751-756.

367 Boregowda, S.V., Krishnappa, V., Haga, C.L., Ortiz, L.A., and Phinney, D.G. (2016). A Clinical  
368 Indications Prediction Scale Based on TWIST1 for Human Mesenchymal Stem Cells. *EBioMedicine* 4,  
369 62-73.

370 Brookes, P.S. (2005). Mitochondrial H(+) leak and ROS generation: an odd couple. *Free Radic Biol*  
371 *Med* 38, 12-23.

372 Burns, T.F., Dobromilskaya, I., Murphy, S.C., Gajula, R.P., Thiyagarajan, S., Chatley, S.N., Aziz, K., Cho,  
373 Y.J., Tran, P.T., and Rudin, C.M. (2013). Inhibition of TWIST1 leads to activation of oncogene-induced  
374 senescence in oncogene-driven non-small cell lung cancer. *Mol Cancer Res* 11, 329-338.

375 Cheng, H., Qiu, L., Ma, J., Zhang, H., Cheng, M., Li, W., Zhao, X., and Liu, K. (2011). Replicative  
376 senescence of human bone marrow and umbilical cord derived mesenchymal stem cells and their  
377 differentiation to adipocytes and osteoblasts. *Mol Biol Rep* 38, 5161-5168.

378 Correia-Melo, C., Marques, F.D., Anderson, R., Hewitt, G., Hewitt, R., Cole, J., Carroll, B.M., Miwa, S.,  
379 Birch, J., Merz, A., *et al.* (2016). Mitochondria are required for pro-ageing features of the senescent  
380 phenotype. *Embo J* 35, 724-742.

381 Dörr, J.R., Yu, Y., Milanovic, M., Beuster, G., Zasada, C., Däbritz, J.H., Lisec, J., Lenze, D., Gerhardt, A.,  
382 Schleicher, K., *et al.* (2013). Synthetic lethal metabolic targeting of cellular senescence in cancer  
383 therapy. *Nature* 501, 421-425.

384 Erices, A., Conget, P., and Minguell, J.J. (2000). Mesenchymal progenitor cells in human umbilical  
385 cord blood. *Br J Haematol* *109*, 235-242.

386 Halvorsen, Y.C., Wilkison, W.O., and Gimble, J.M. (2000). Adipose-derived stromal cells--their utility  
387 and potential in bone formation. *Int J Obes Relat Metab Disord* *24 Suppl 4*, S41-44.

388 Haynesworth, S.E., Goshima, J., Goldberg, V.M., and Caplan, A.I. (1992). Characterization of cells with  
389 osteogenic potential from human marrow. *Bone* *13*, 81-88.

390 Hochane, M., Trichet, V., Pecqueur, C., Avril, P., Oliver, L., Denis, J., Brion, R., Amiaud, J., Pineau, A.,  
391 Naveilhan, P., *et al.* (2017). Low-Dose Pesticide Mixture Induces Senescence in Normal Mesenchymal  
392 Stem Cells (MSC) and Promotes Tumorigenic Phenotype in Premalignant MSC. *Stem Cells* *35*, 800-  
393 811.

394 Isenmann, S., Arthur, A., Zannettino, A.C., Turner, J.L., Shi, S., Glackin, C.A., and Gronthos, S. (2009).  
395 TWIST family of basic helix-loop-helix transcription factors mediate human mesenchymal stem cell  
396 growth and commitment. *Stem Cells* *27*, 2457-2468.

397 James, E.L., Michalek, R.D., Pitiyage, G.N., de Castro, A.M., Vignola, K.S., Jones, J., Mohny, R.P.,  
398 Karoly, E.D., Prime, S.S., and Parkinson, E.K. (2015). Senescent human fibroblasts show increased  
399 glycolysis and redox homeostasis with extracellular metabolomes that overlap with those of  
400 irreparable DNA damage, aging, and disease. *J Proteome Res* *14*, 1854-1871.

401 Knuth, C.A., Kiernan, C.H., Palomares Cabeza, V., Lehmann, J., Witte-Bouma, J., Ten Berge, D., Brama,  
402 P.A., Wolvius, E.B., Strabbing, E.M., Koudstaal, M.J., *et al.* (2018). Isolating Pediatric Mesenchymal  
403 Stem Cells with Enhanced Expansion and Differentiation Capabilities. *Tissue Eng Part C Methods* *24*,  
404 313-321.

405 Lee, H.C., Yin, P.H., Chi, C.W., and Wei, Y.H. (2002). Increase in mitochondrial mass in human  
406 fibroblasts under oxidative stress and during replicative cell senescence. *J Biomed Sci* *9*, 517-526.

407 Li, Y., Wu, Q., Wang, Y., Li, L., Bu, H., and Bao, J. (2017). Senescence of mesenchymal stem cells  
408 (Review). *Int J Mol Med* *39*, 775-782.

409 Li, Y., Xu, X., Wang, L., Liu, G., Li, Y., Wu, X., Jing, Y., Li, H., and Wang, G. (2015). Senescent  
410 mesenchymal stem cells promote colorectal cancer cells growth via galectin-3 expression. *Cell Biosci*  
411 *5*, 21.

412 Loeser, R.F., Collins, J.A., and Diekman, B.O. (2016). Ageing and the pathogenesis of osteoarthritis.  
413 *Nat Rev Rheumatol* *12*, 412-420.

414 Lu, S., Wang, H., Ren, R., Shi, X., Zhang, Y., and Ma, W. (2018). Reduced expression of Twist 1 is  
415 protective against insulin resistance of adipocytes and involves mitochondrial dysfunction. *Sci Rep* *8*,  
416 12590.

417 Lunyak, V.V., Amaro-Ortiz, A., and Gaur, M. (2017). Mesenchymal Stem Cells Secretary Responses:  
418 Senescence Messaging Secretome and Immunomodulation Perspective. *Front Genet* *8*, 220.

419 Milanese, C., Bombardieri, C.R., Sepe, S., Barnhoorn, S., Payán-Goméz, C., Caruso, D., Audano, M.,  
420 Pedretti, S., Vermeij, W.P., Brandt, R.M.C., *et al.* (2019). DNA damage and transcription stress cause  
421 ATP-mediated redesign of metabolism and potentiation of anti-oxidant buffering. *Nat Commun* *10*,  
422 4887.

423 Narcisi, R., Cleary, M.A., Brama, P.A., Hoogduijn, M.J., Tuysuz, N., ten Berge, D., and van Osch, G.J.  
424 (2015). Long-term expansion, enhanced chondrogenic potential, and suppression of endochondral  
425 ossification of adult human MSCs via WNT signaling modulation. *Stem Cell Reports* *4*, 459-472.

426 Nayak, D., Kumar, A., Chakraborty, S., Rasool, R.U., Amin, H., Katoch, A., Gopinath, V., Mahajan, V.,  
427 Zilla, M.K., Rah, B., *et al.* (2017). Inhibition of Twist1-mediated invasion by Chk2 promotes premature  
428 senescence in p53-defective cancer cells. *Cell Death Differ* *24*, 1275-1287.

429 Pattappa, G., Heywood, H.K., de Bruijn, J.D., and Lee, D.A. (2011). The metabolism of human  
430 mesenchymal stem cells during proliferation and differentiation. *J Cell Physiol* *226*, 2562-2570.

431 Pittenger, M.F., Mackay, A.M., Beck, S.C., Jaiswal, R.K., Douglas, R., Mosca, J.D., Moorman, M.A.,  
432 Simonetti, D.W., Craig, S., and Marshak, D.R. (1999). Multilineage potential of adult human  
433 mesenchymal stem cells. *Science* *284*, 143-147.

434 Quijano, C., Cao, L., Fergusson, M.M., Romero, H., Liu, J., Gutkind, S., Rovira, I., Mohny, R.P., Karoly,  
435 E.D., and Finkel, T. (2012). Oncogene-induced senescence results in marked metabolic and  
436 bioenergetic alterations. *Cell Cycle* 11, 1383-1392.

437 Romanov, Y.A., Svintsitskaya, V.A., and Smirnov, V.N. (2003). Searching for alternative sources of  
438 postnatal human mesenchymal stem cells: candidate MSC-like cells from umbilical cord. *Stem Cells*  
439 21, 105-110.

440 Seo, S.K., Kim, J.H., Choi, H.N., Choe, T.B., Hong, S.I., Yi, J.Y., Hwang, S.G., Lee, H.G., Lee, Y.H., and  
441 Park, I.C. (2014). Knockdown of TWIST1 enhances arsenic trioxide- and ionizing radiation-induced cell  
442 death in lung cancer cells by promoting mitochondrial dysfunction. *Biochem Biophys Res Commun*  
443 449, 490-495.

444 Tran, P.T., Shroff, E.H., Burns, T.F., Thiyagarajan, S., Das, S.T., Zabuawala, T., Chen, J., Cho, Y.J., Luong,  
445 R., Tamayo, P., *et al.* (2012). Twist1 suppresses senescence programs and thereby accelerates and  
446 maintains mutant Kras-induced lung tumorigenesis. *PLoS Genet* 8, e1002650.

447 Tsai, C.C., Chen, Y.J., Yew, T.L., Chen, L.L., Wang, J.Y., Chiu, C.H., and Hung, S.C. (2011). Hypoxia  
448 inhibits senescence and maintains mesenchymal stem cell properties through down-regulation of  
449 E2A-p21 by HIF-TWIST. *Blood* 117, 459-469.

450 Vizioli, M.G., Liu, T., Miller, K.N., Robertson, N.A., Gilroy, K., Lagnado, A.B., Perez-Garcia, A., Kiourtis,  
451 C., Dasgupta, N., Lei, X., *et al.* (2020). Mitochondria-to-nucleus retrograde signaling drives formation  
452 of cytoplasmic chromatin and inflammation in senescence. *Genes Dev* 34, 428-445.

453 Voskamp, C., van de Peppel, J., Gasparini, S., Giannoni, P., van Leeuwen, J., van Osch, G., and Narcisi,  
454 R. (2020). Sorting living mesenchymal stem cells using a TWIST1 RNA-based probe depends on  
455 incubation time and uptake capacity. *Cytotechnology* 72, 37-45.

456 Wiley, C.D., Velarde, M.C., Lecot, P., Liu, S., Sarnoski, E.A., Freund, A., Shirakawa, K., Lim, H.W., Davis,  
457 S.S., Ramanathan, A., *et al.* (2016). Mitochondrial Dysfunction Induces Senescence with a Distinct  
458 Secretory Phenotype. *Cell Metab* 23, 303-314.

459 Xu, M., Bradley, E.W., Weivoda, M.M., Hwang, S.M., Pirtskhalava, T., Decklever, T., Curran, G.L.,  
460 Ogrodnik, M., Jurk, D., Johnson, K.O., *et al.* (2017). Transplanted Senescent Cells Induce an  
461 Osteoarthritis-Like Condition in Mice. *J Gerontol A Biol Sci Med Sci* 72, 780-785.  
462 Zhu, Y., Armstrong, J.L., Tchkonina, T., and Kirkland, J.L. (2014). Cellular senescence and the senescent  
463 secretory phenotype in age-related chronic diseases. *Curr Opin Clin Nutr Metab Care* 17, 324-328.  
464 Zuk, P.A., Zhu, M., Mizuno, H., Huang, J., Futrell, J.W., Katz, A.J., Benhaim, P., Lorenz, H.P., and  
465 Hedrick, M.H. (2001). Multilineage cells from human adipose tissue: implications for cell-based  
466 therapies. *Tissue Eng* 7, 211-228.

467

**A**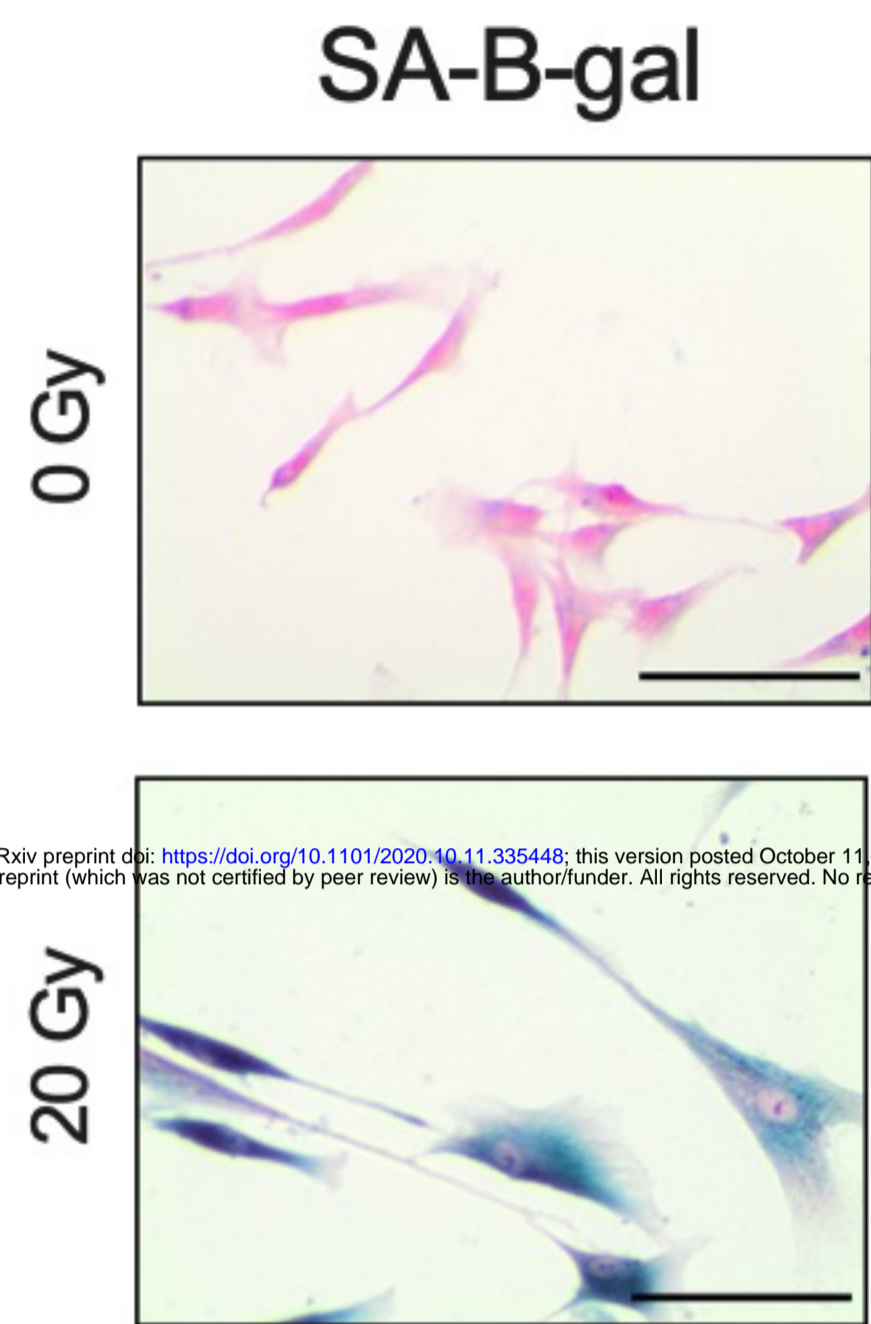

bioRxiv preprint doi: <https://doi.org/10.1101/2020.10.11.335448>; this version posted October 11, 2020. The copyright holder for this preprint (which was not certified by peer review) is the author/funder. All rights reserved. No reuse allowed without permission.

**B**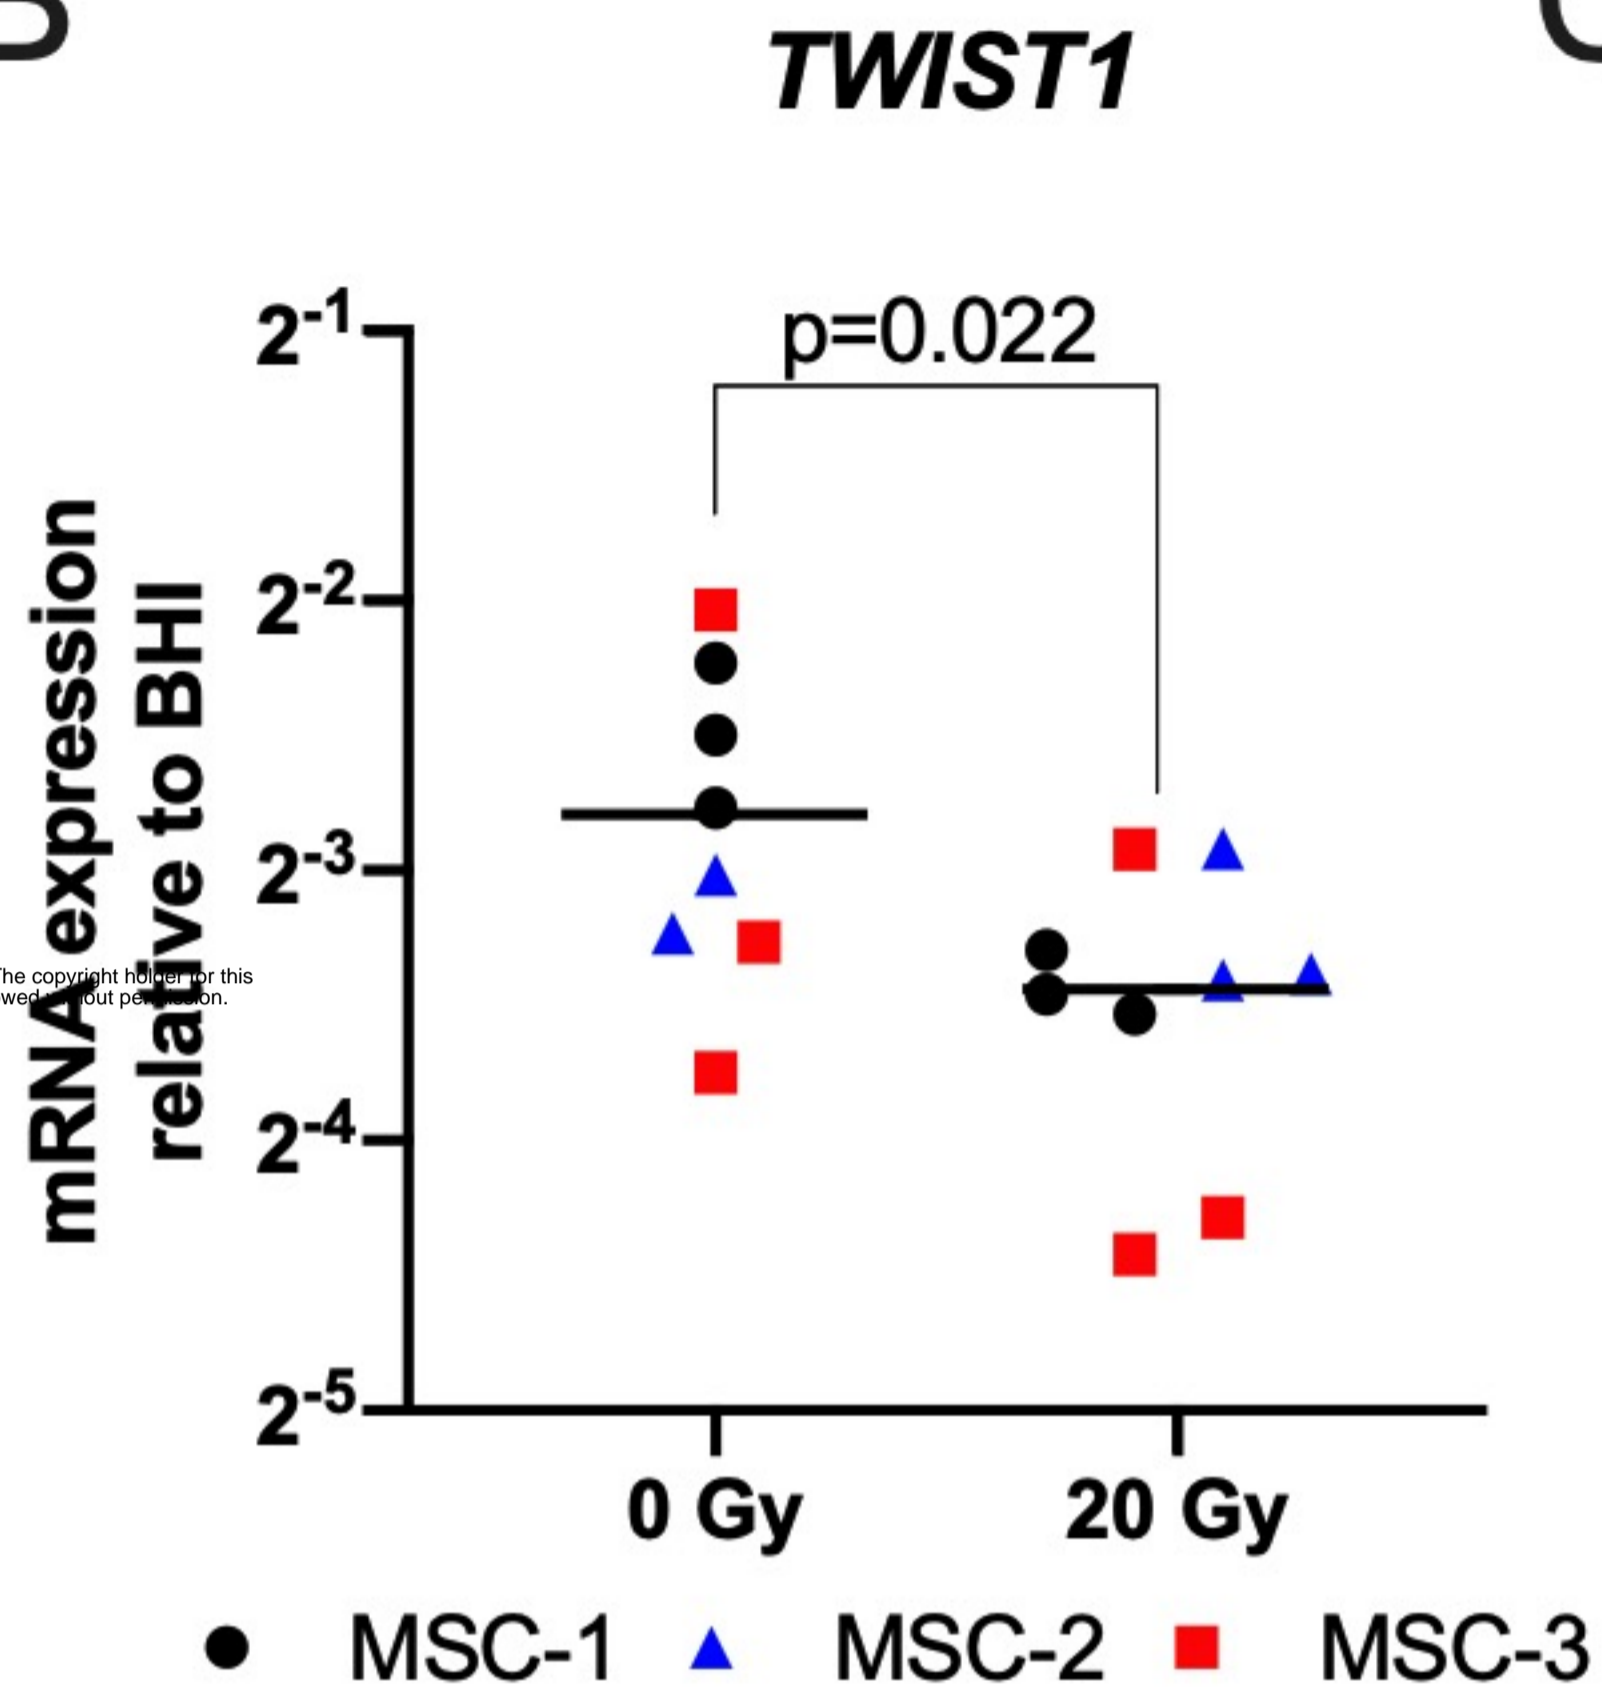**C**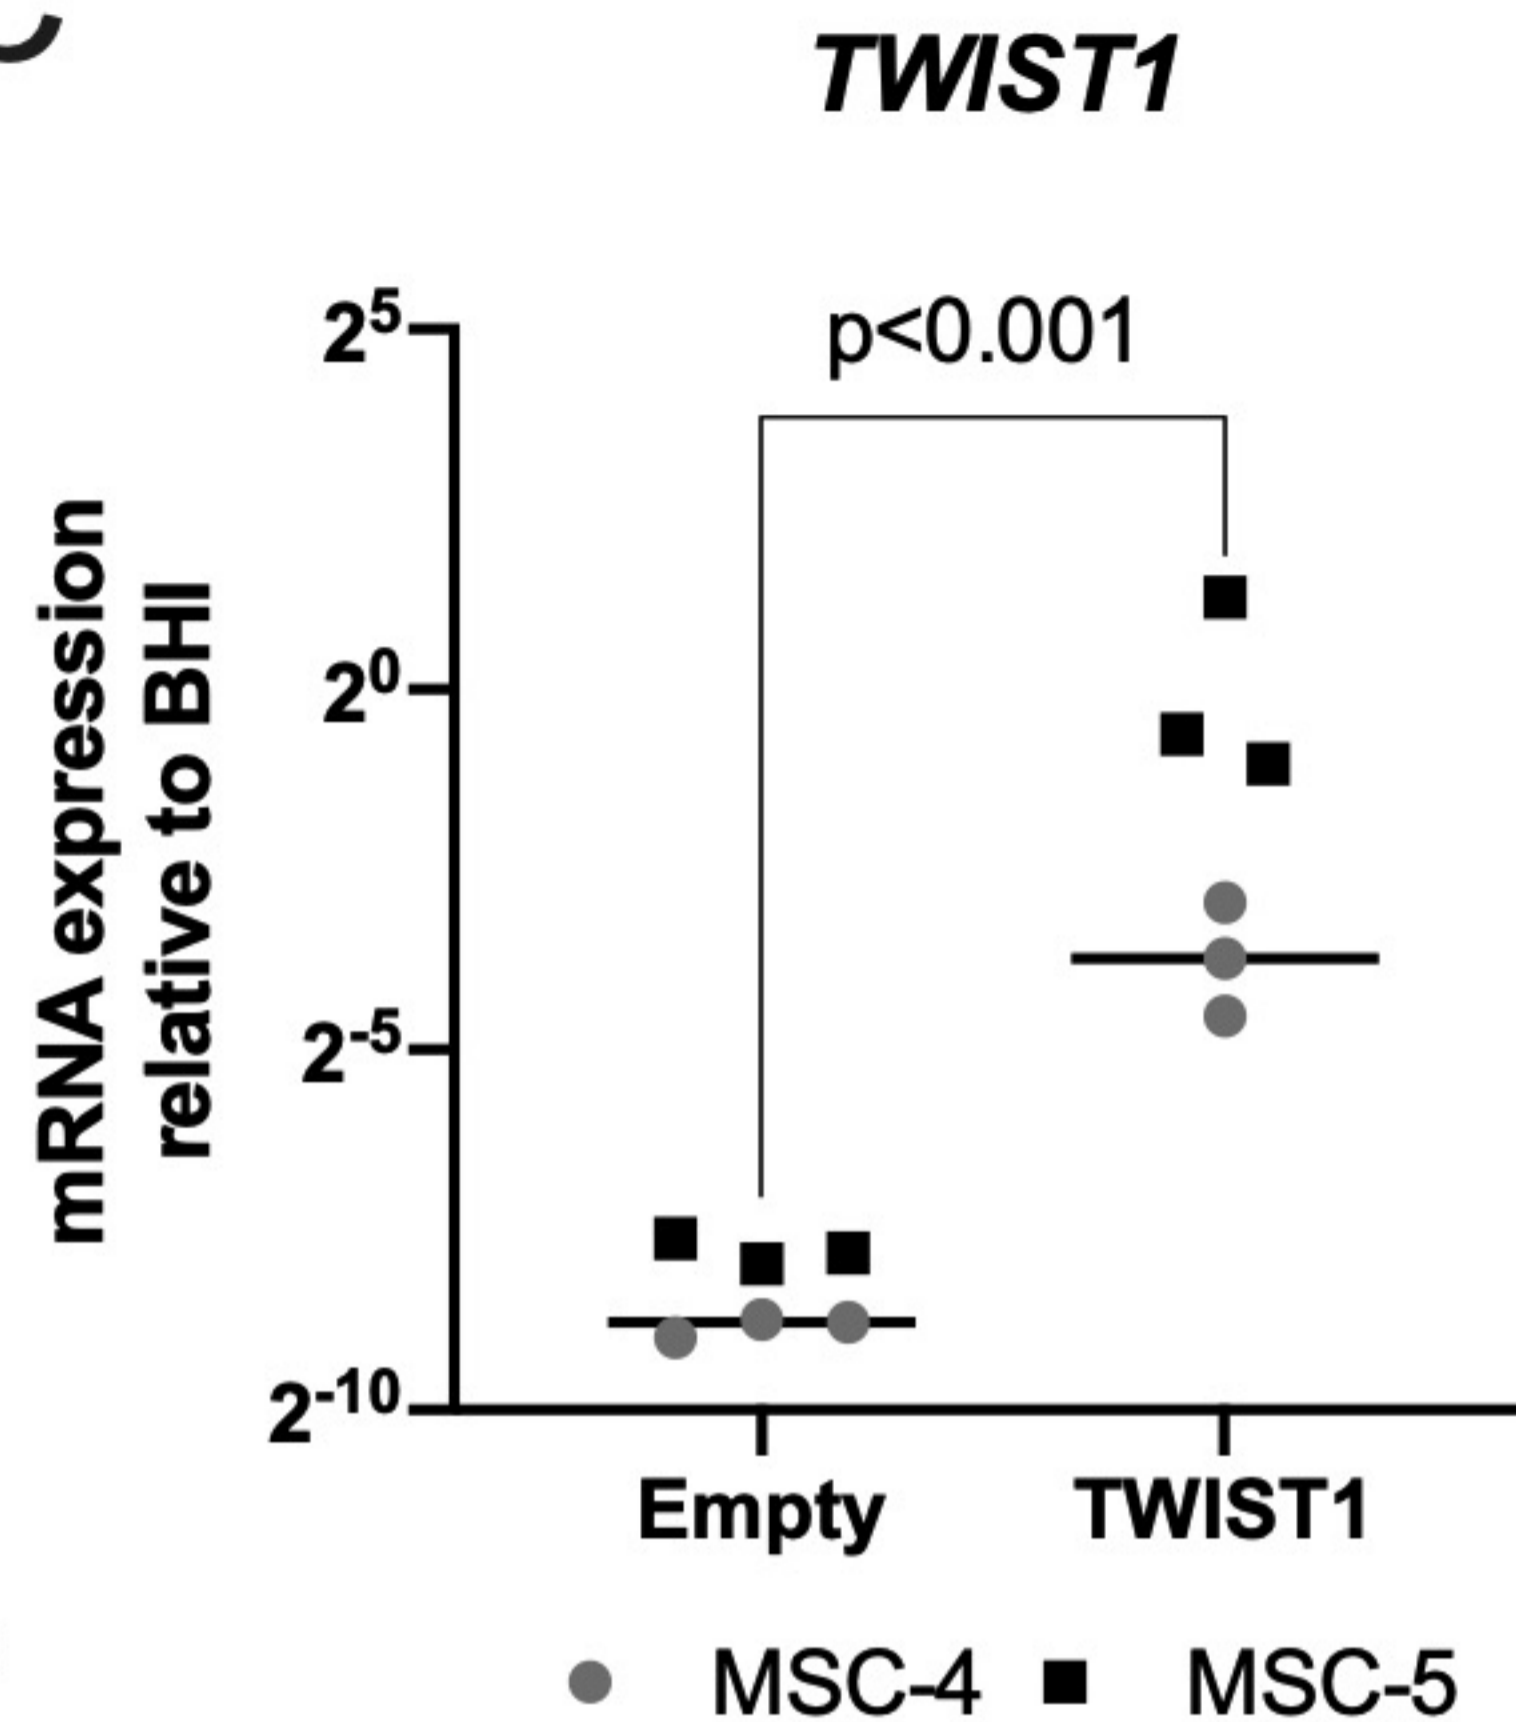**D**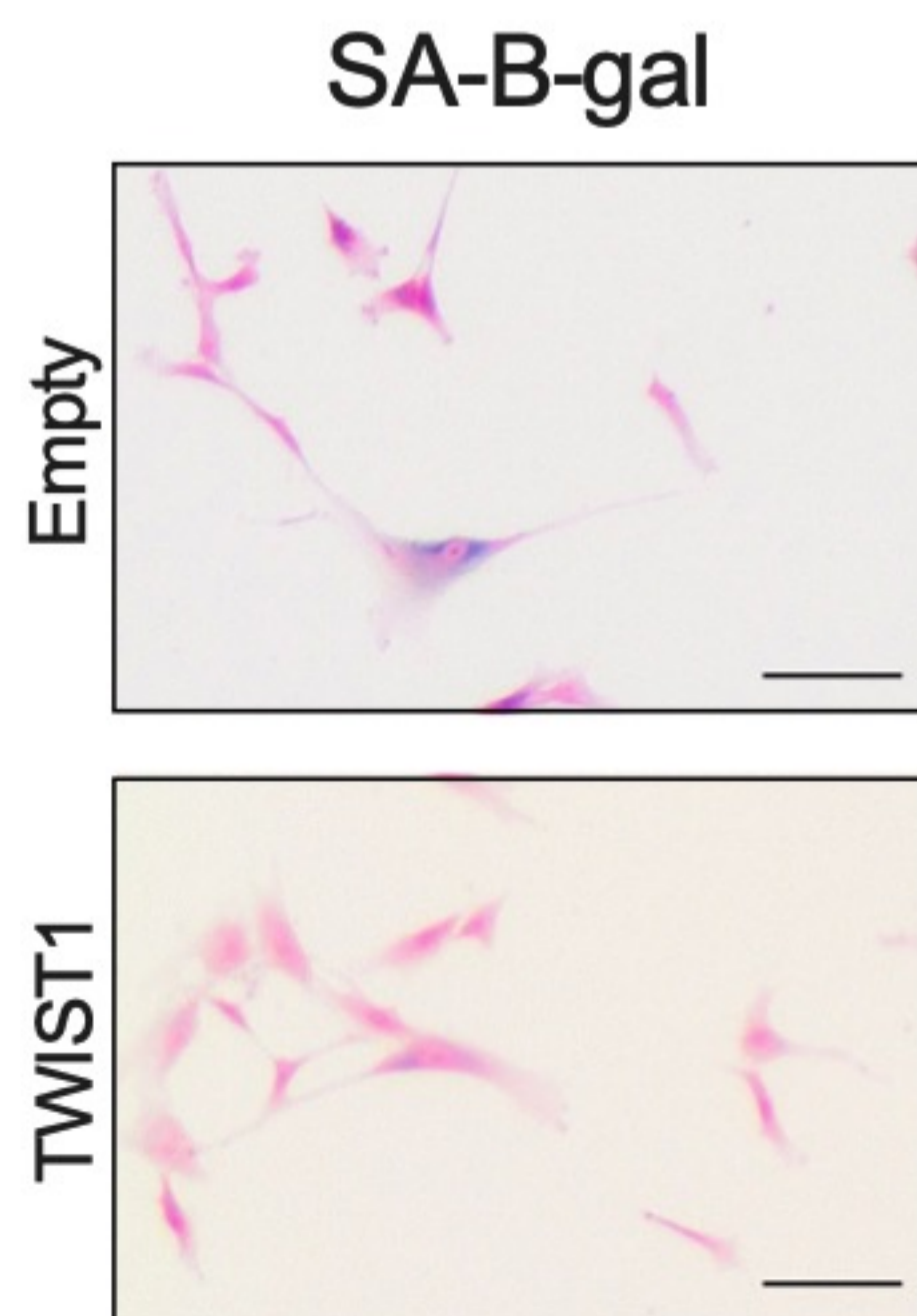**Quantification**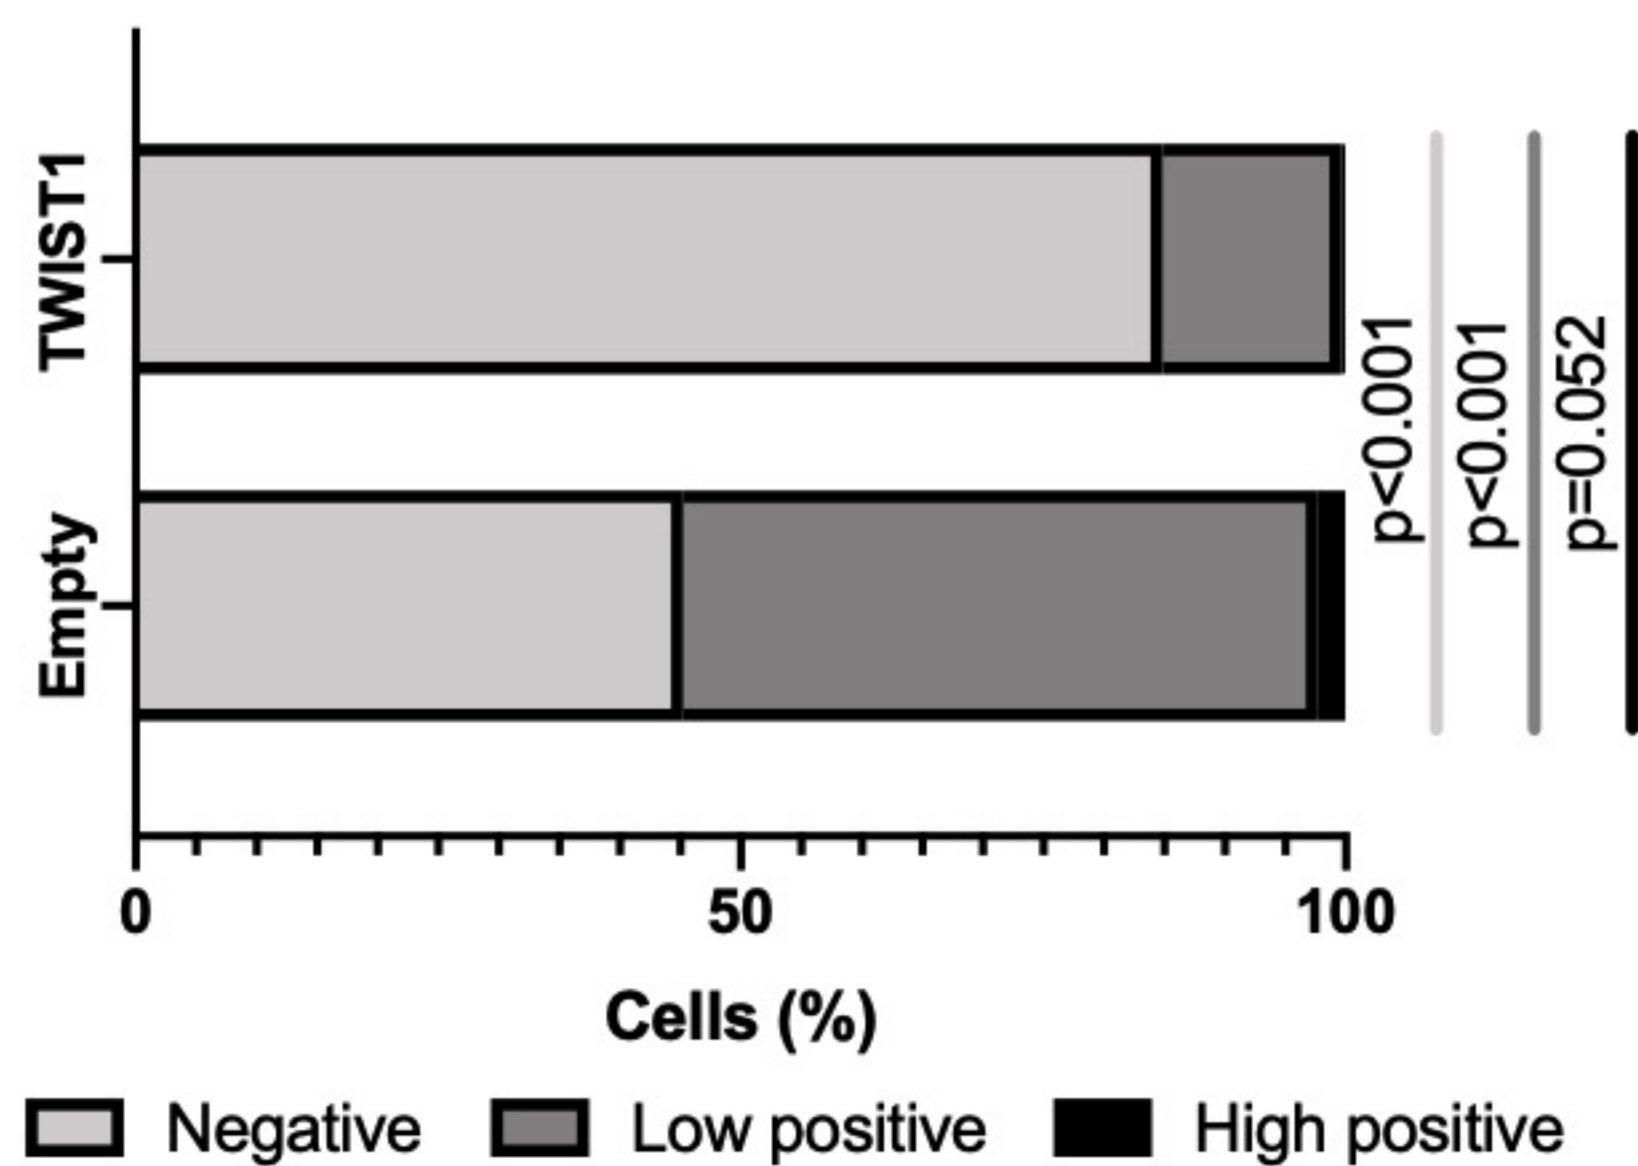

**A**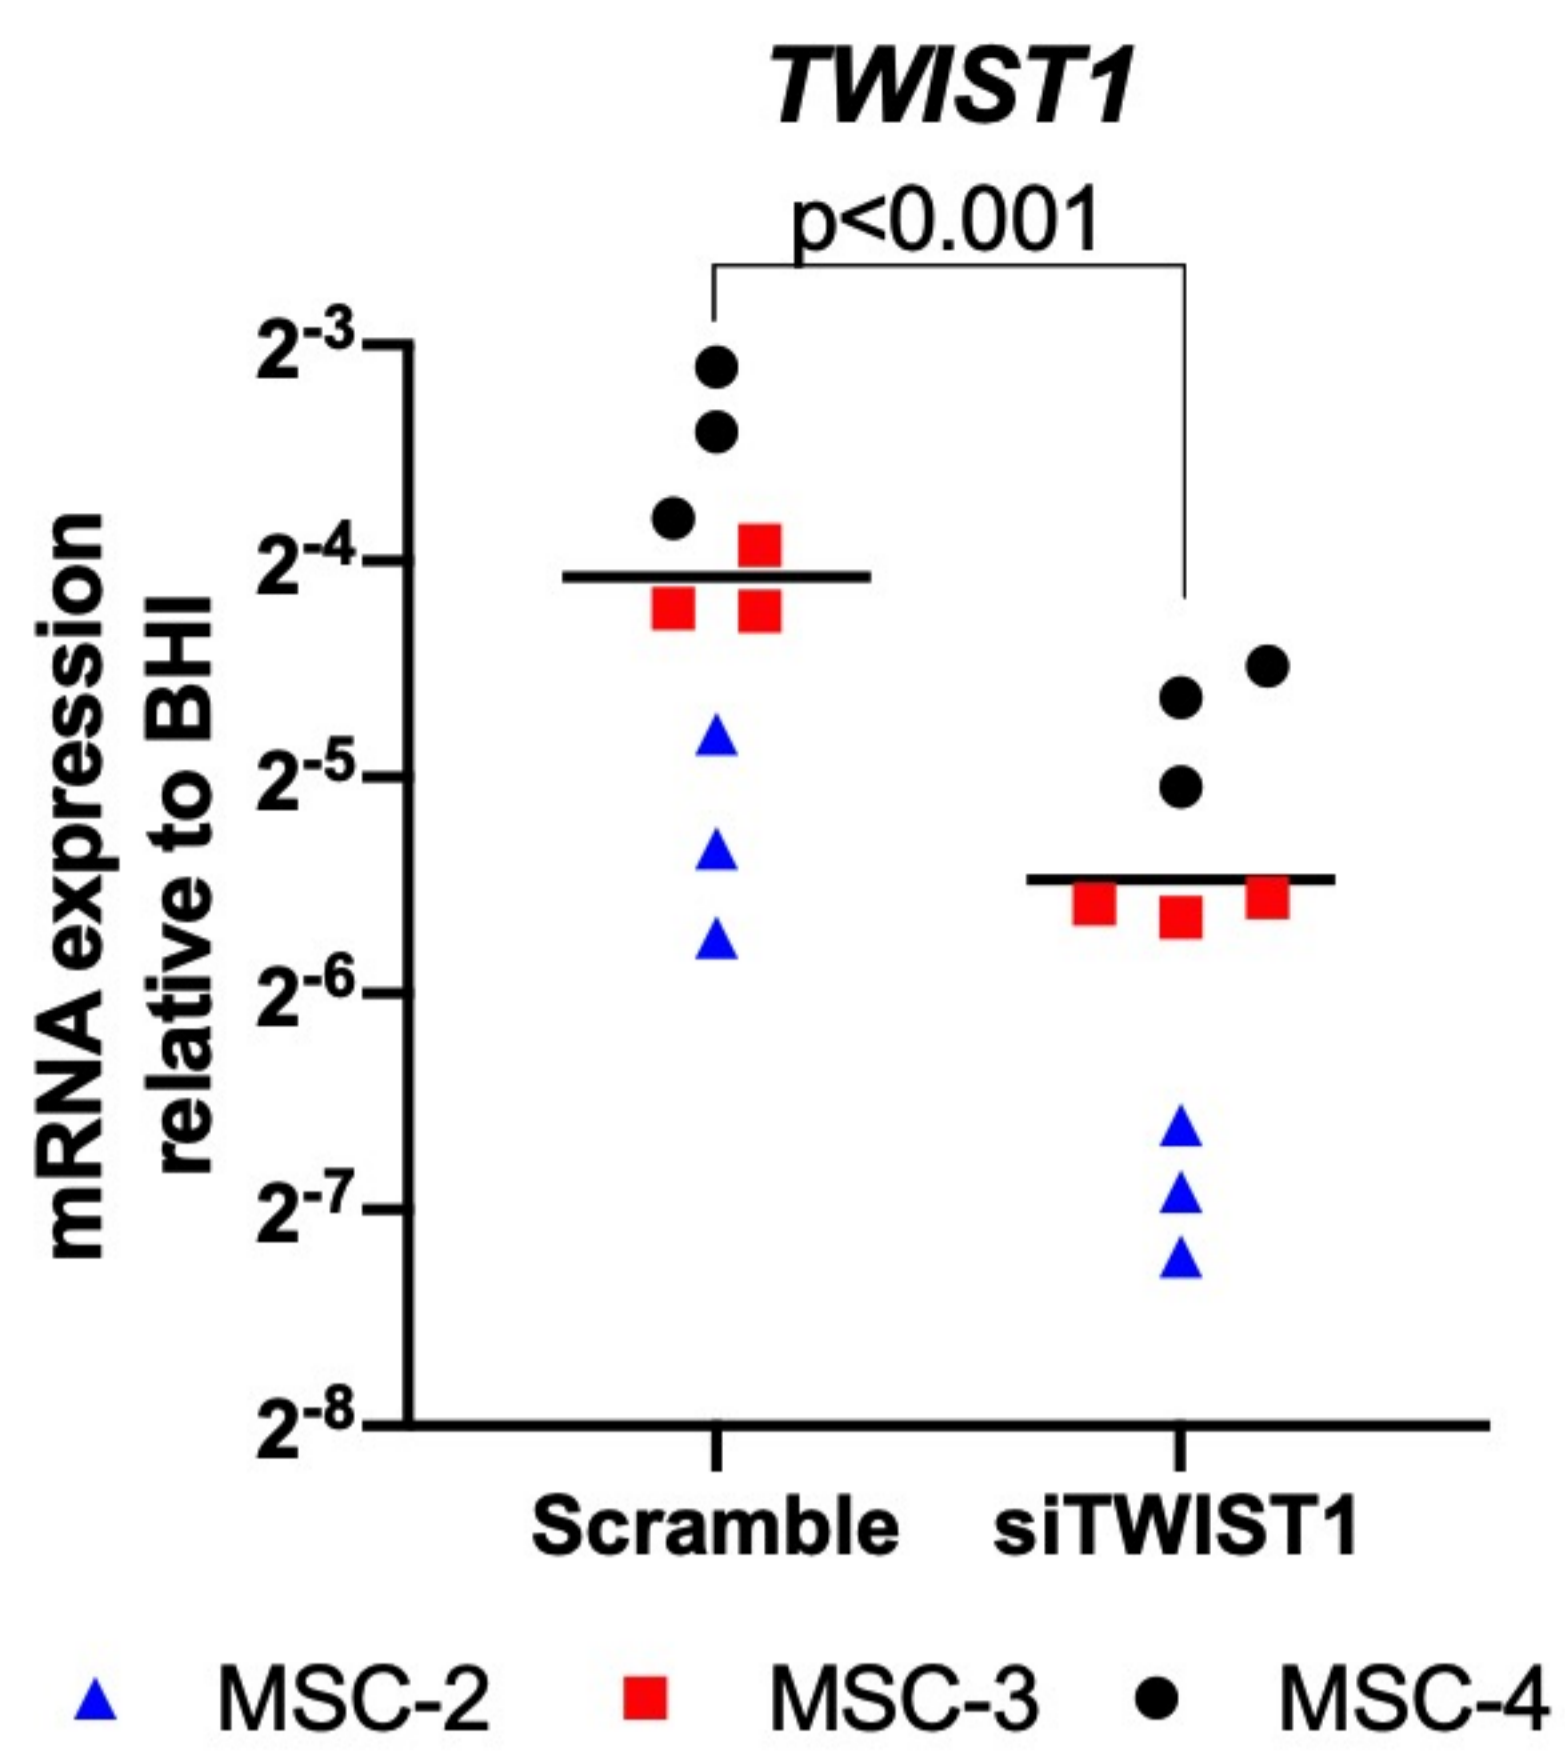**B**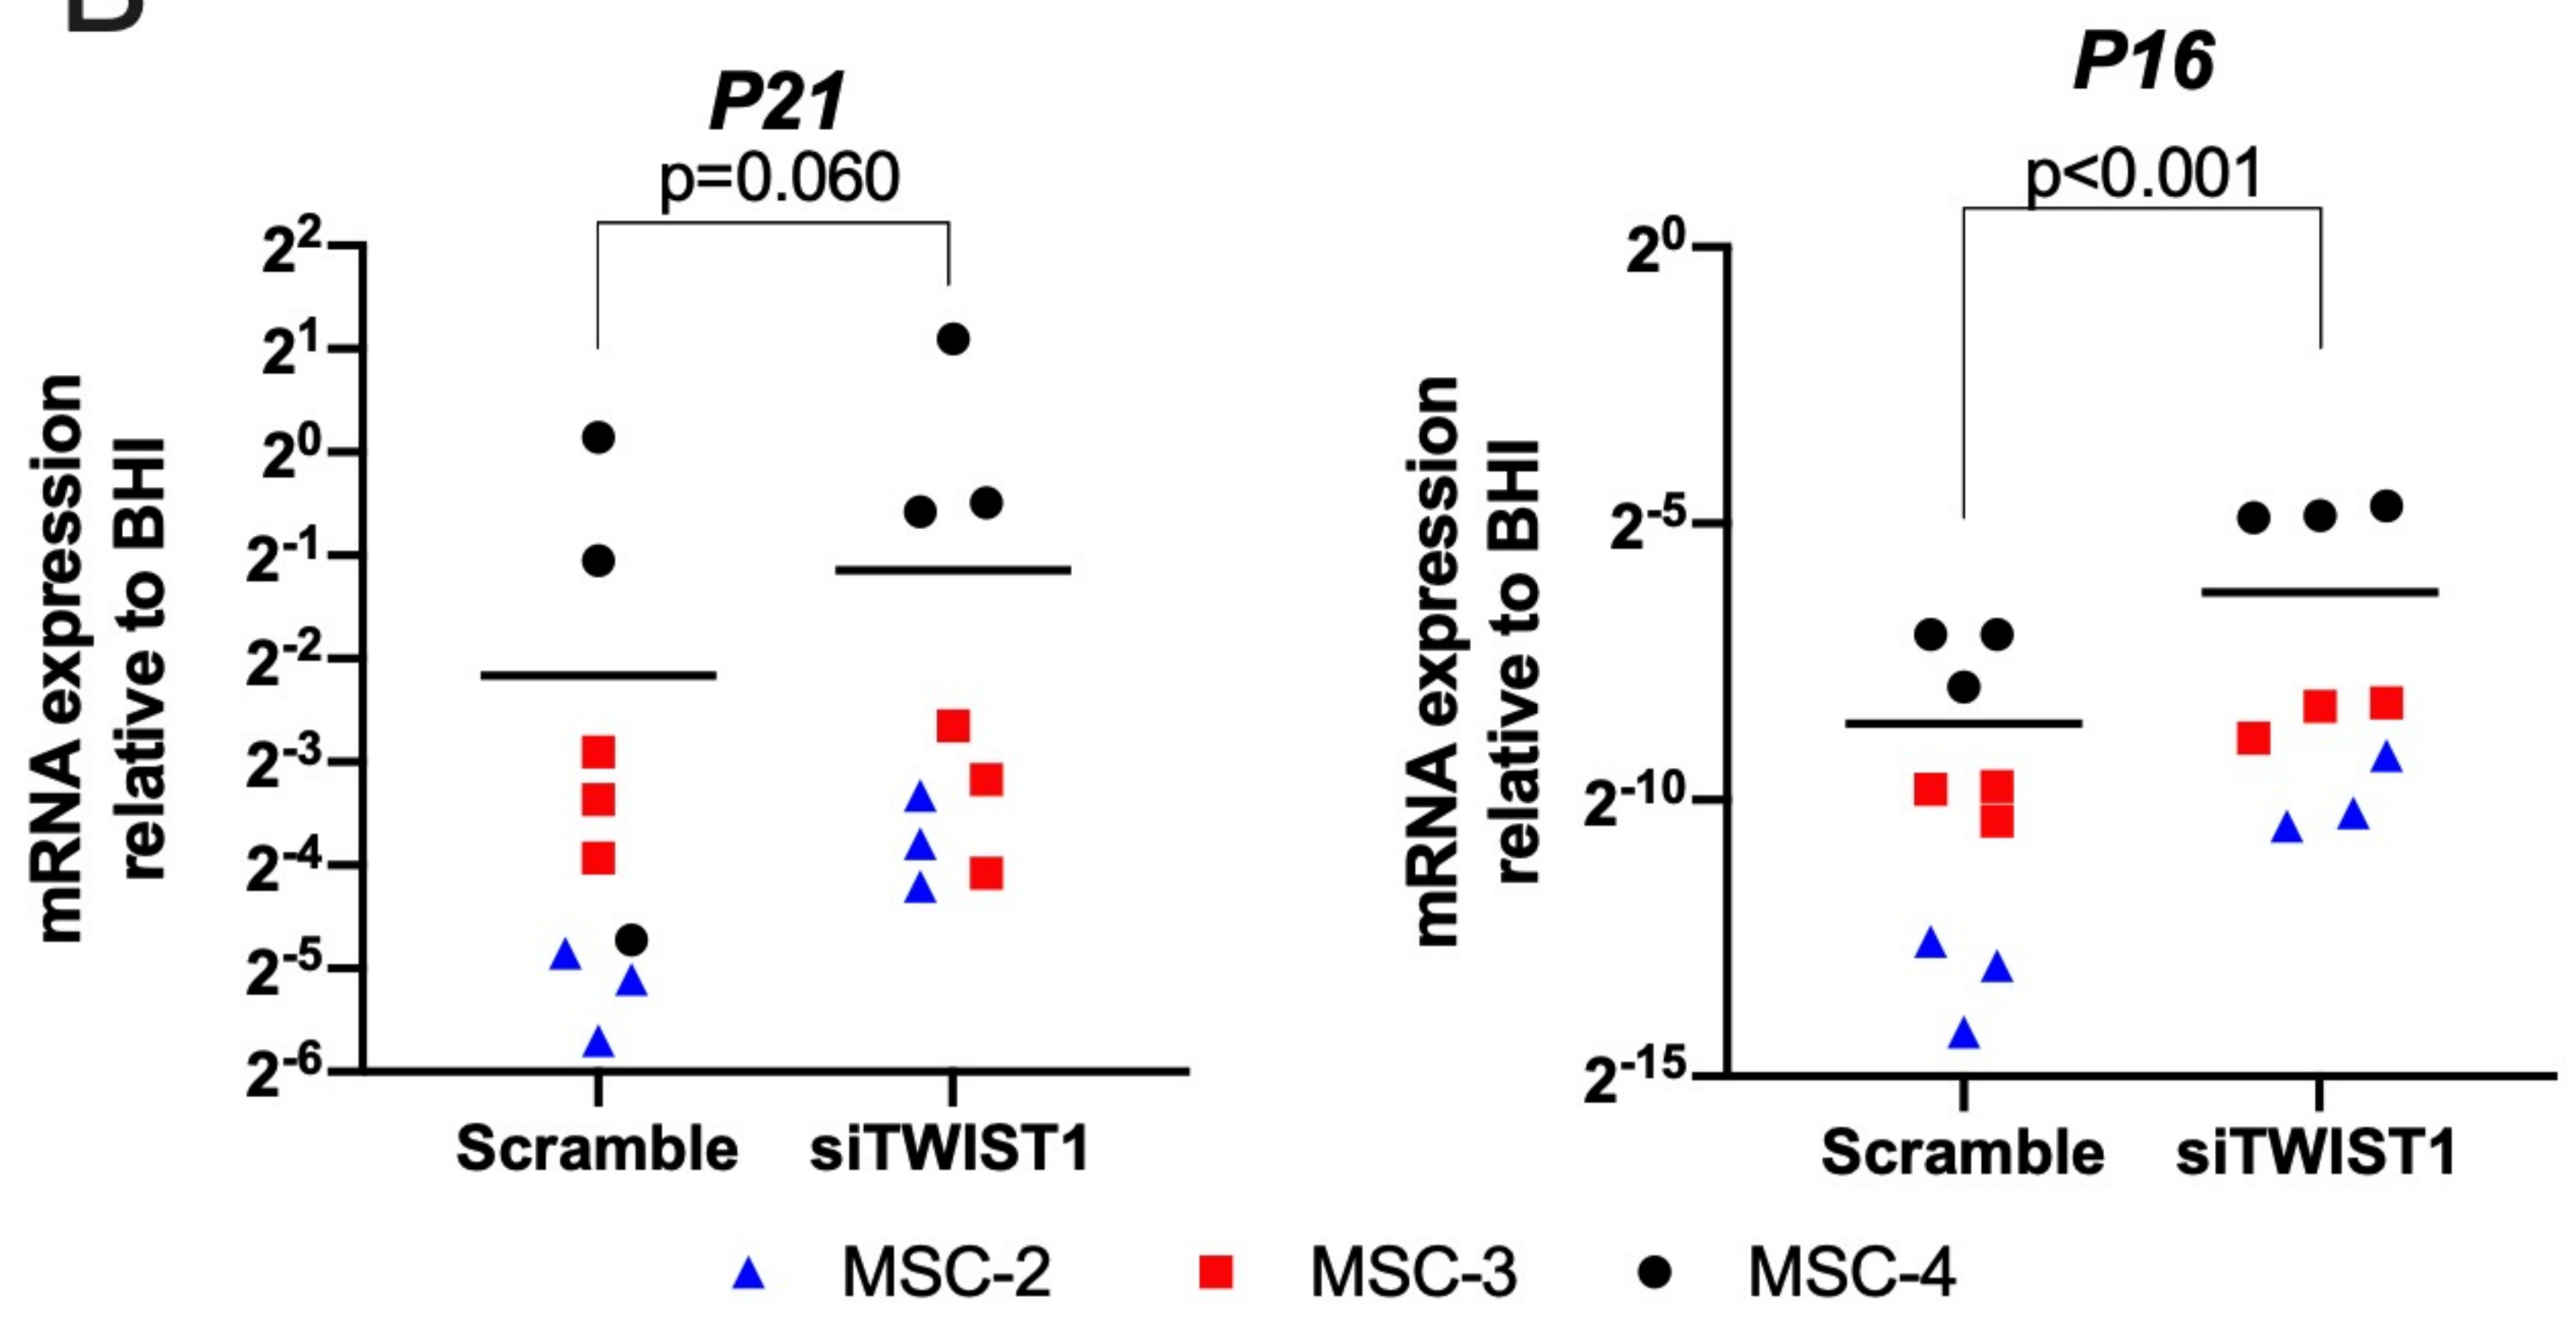**C**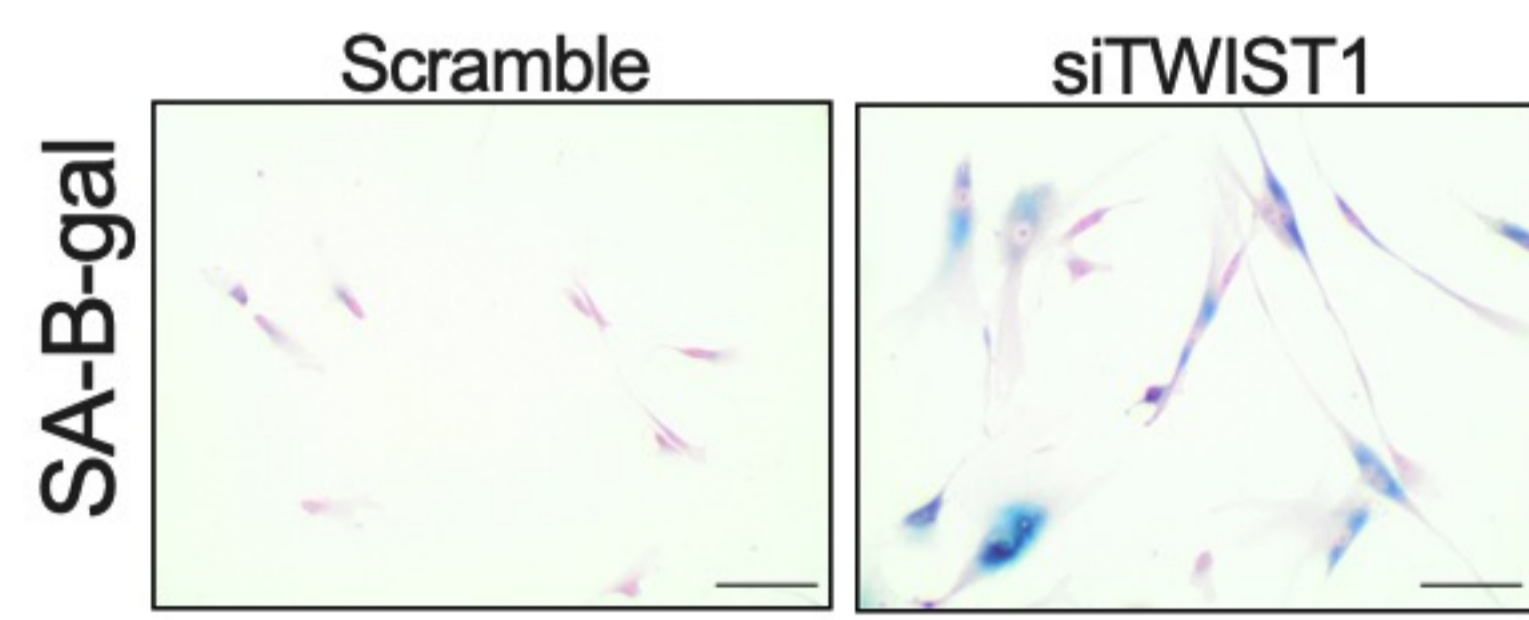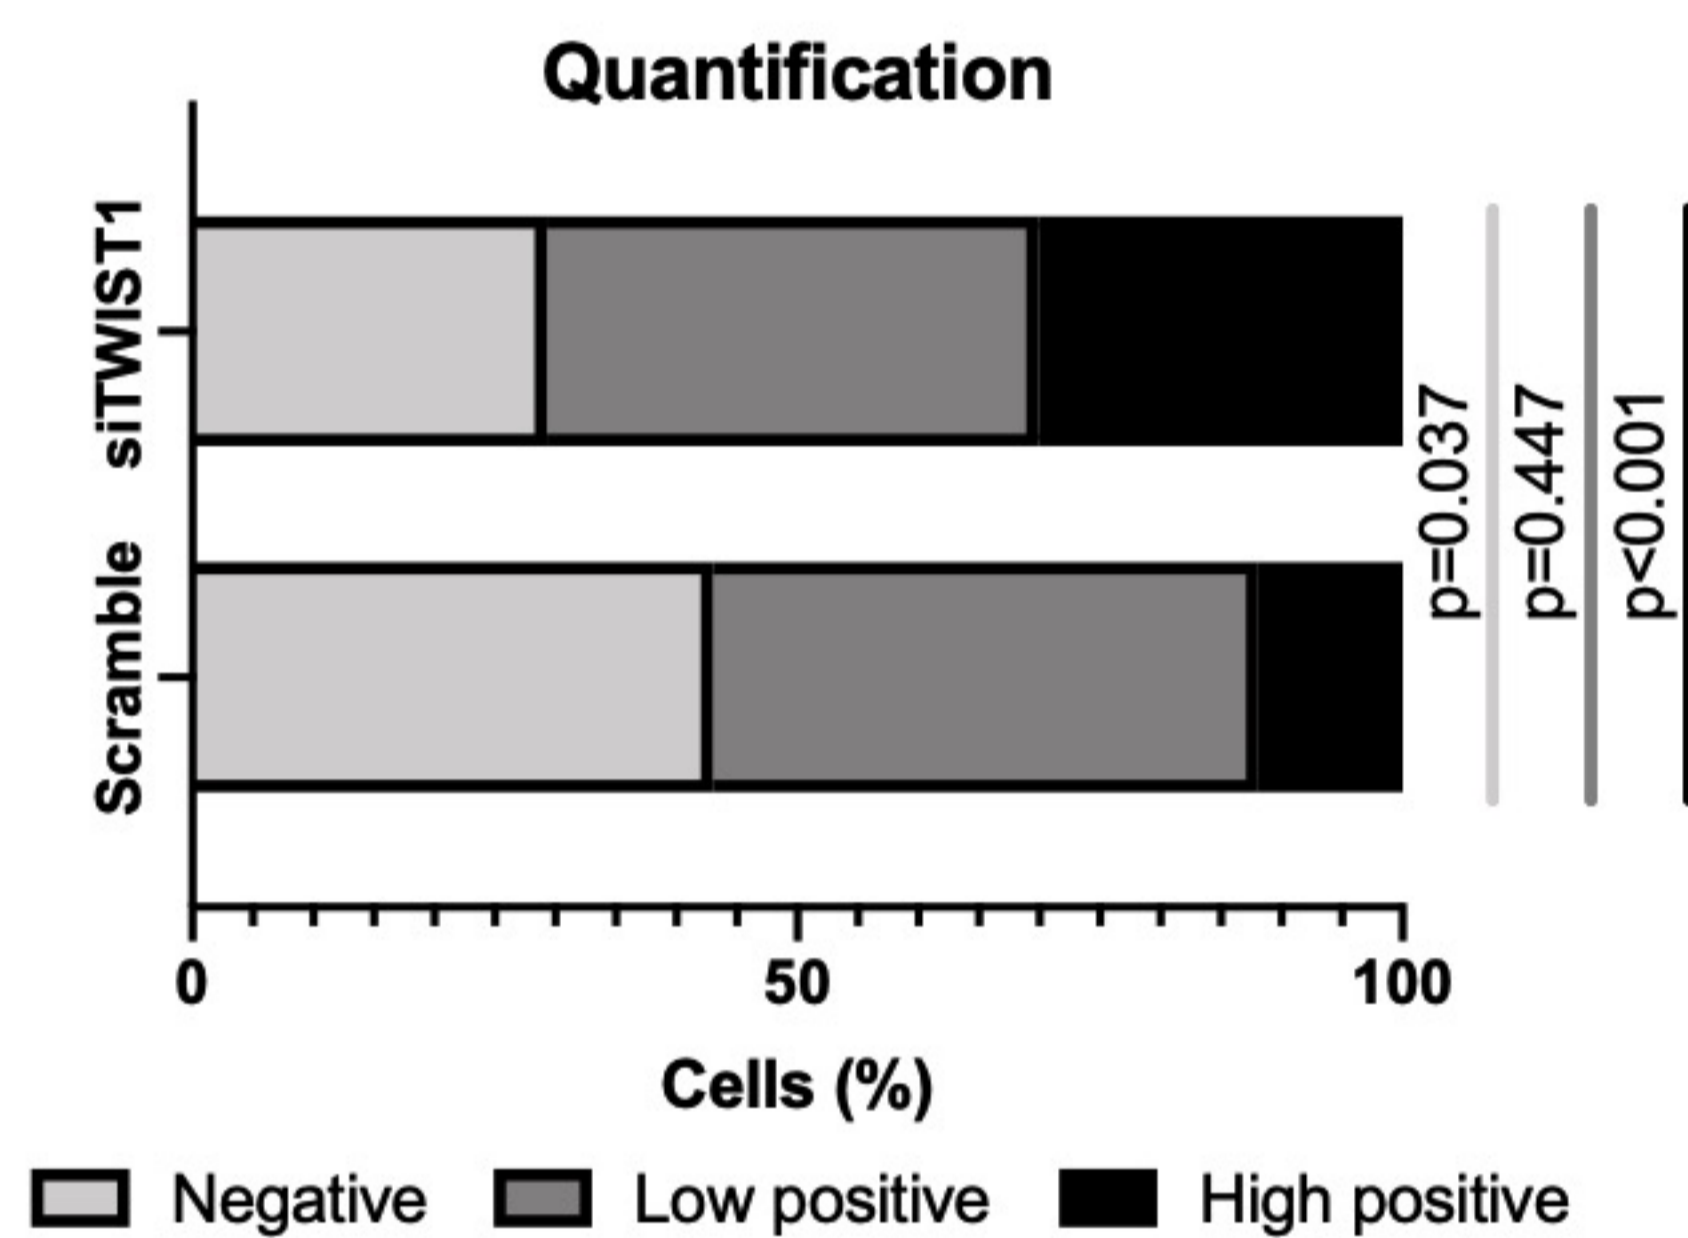**D**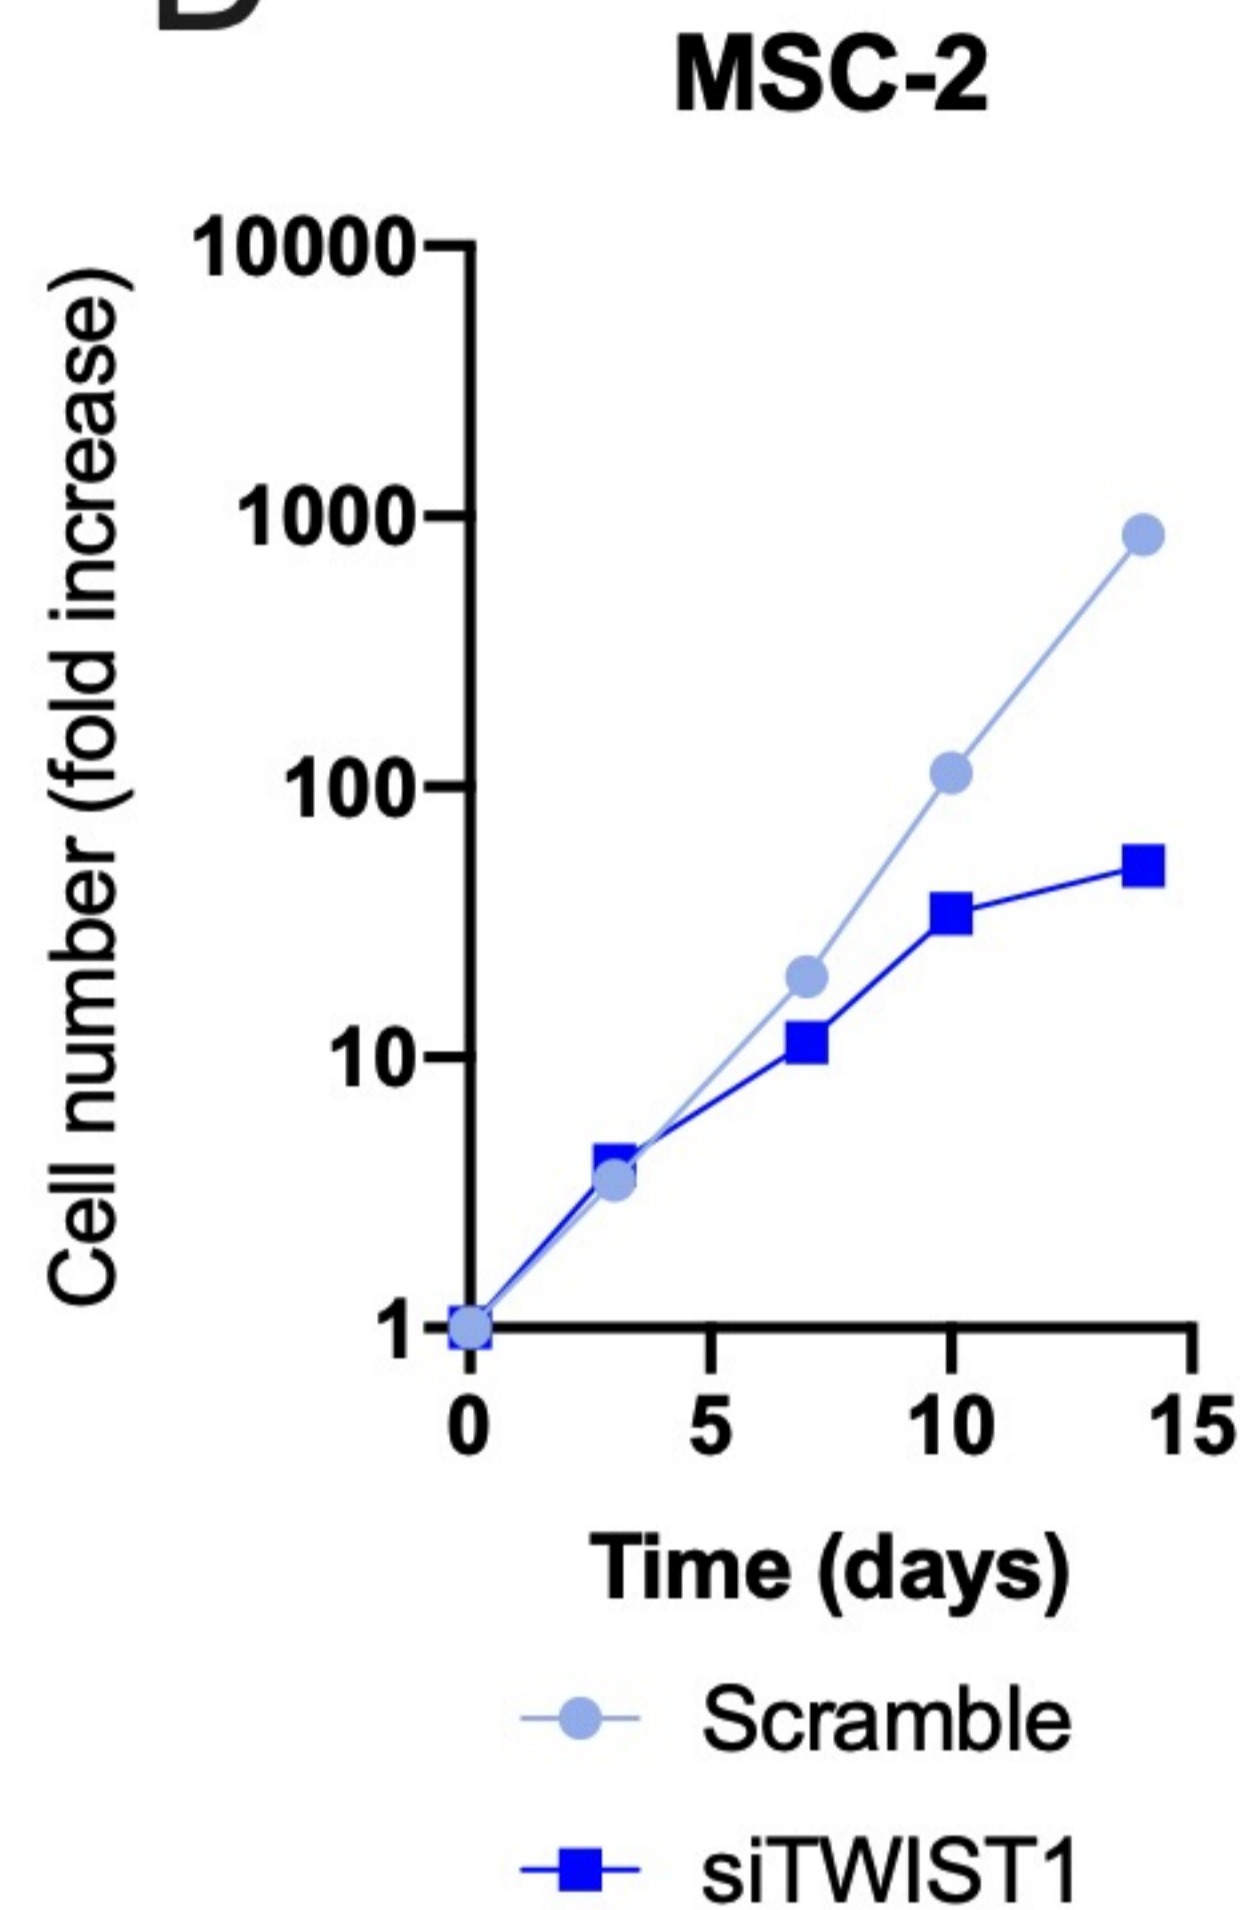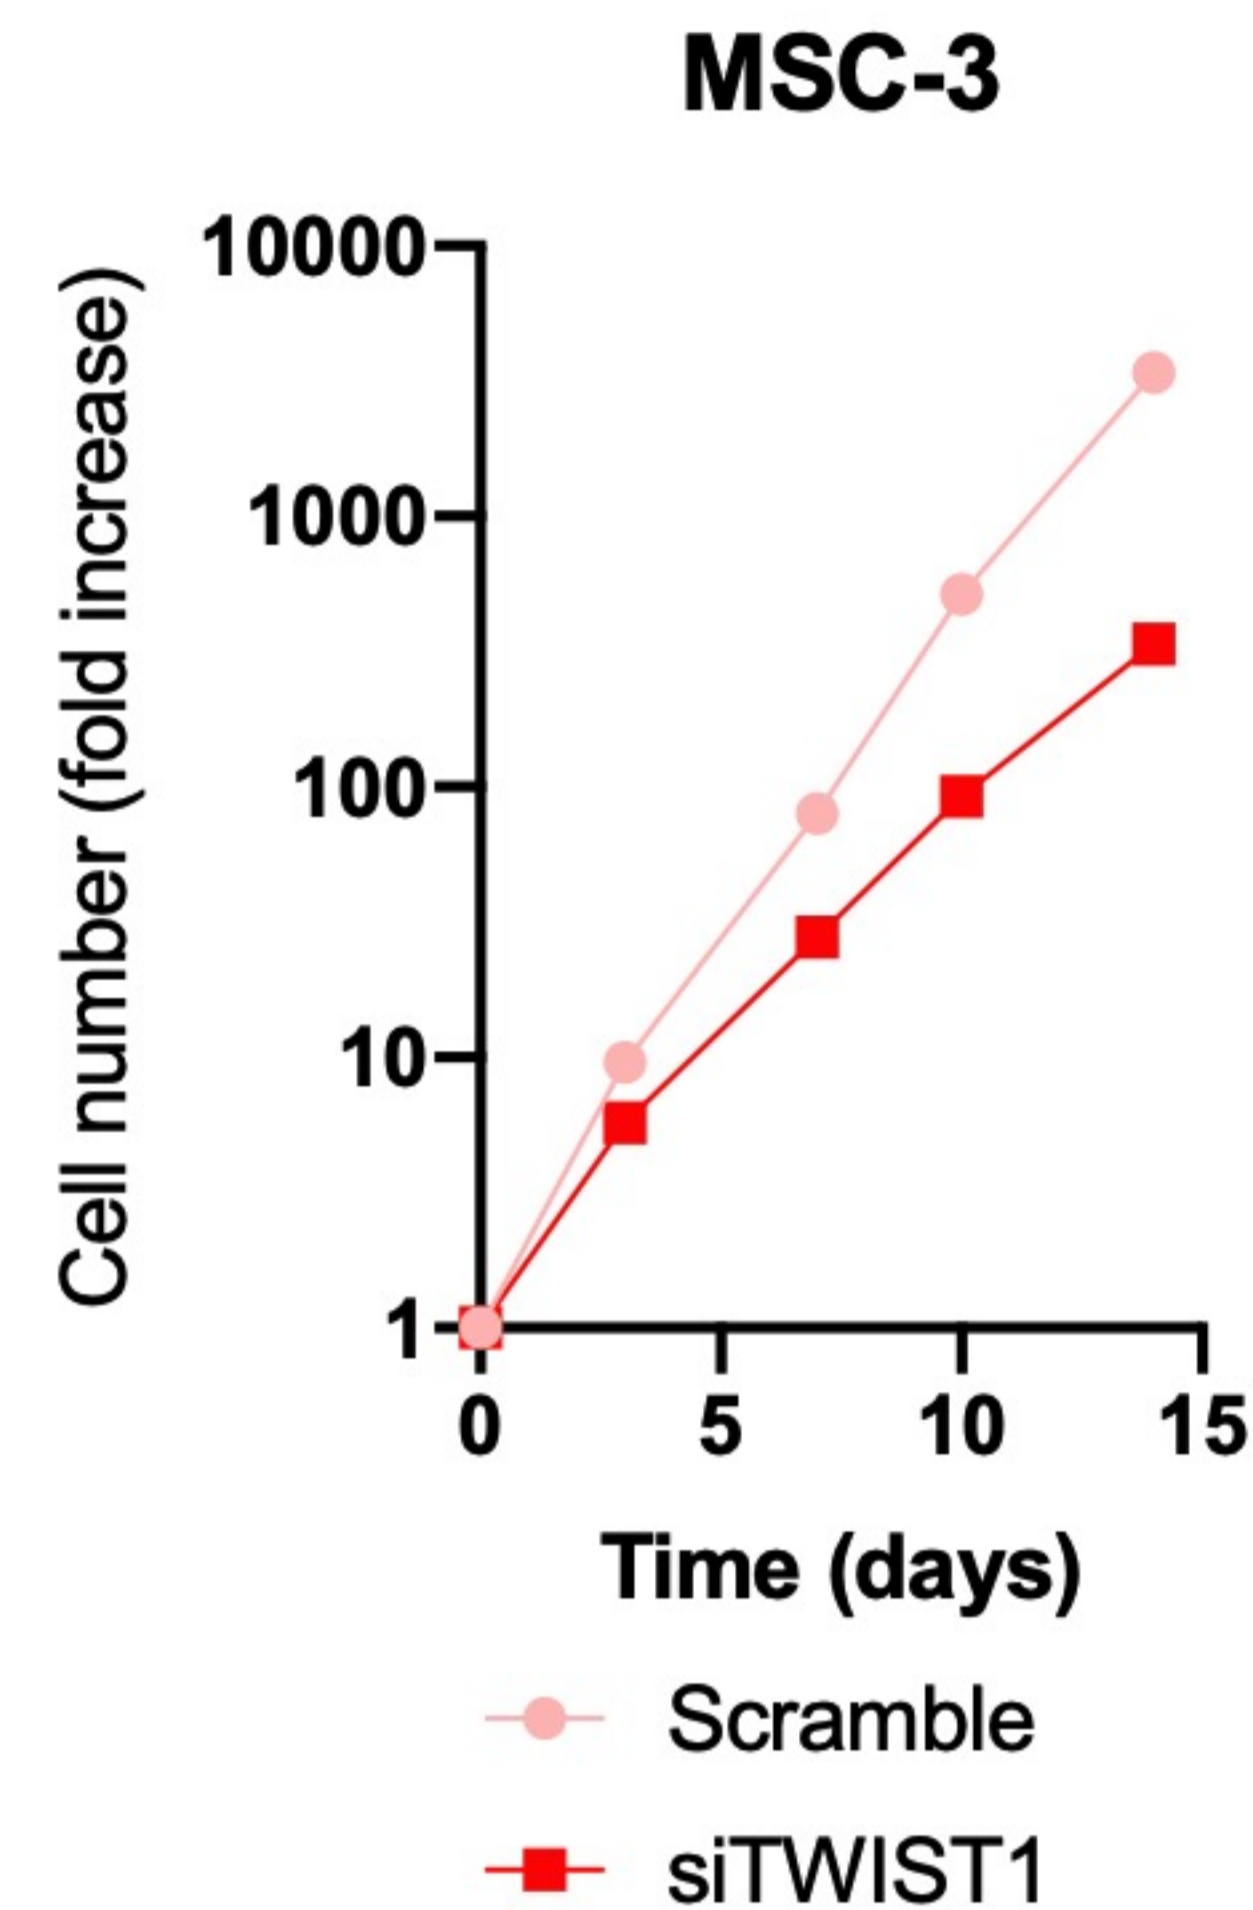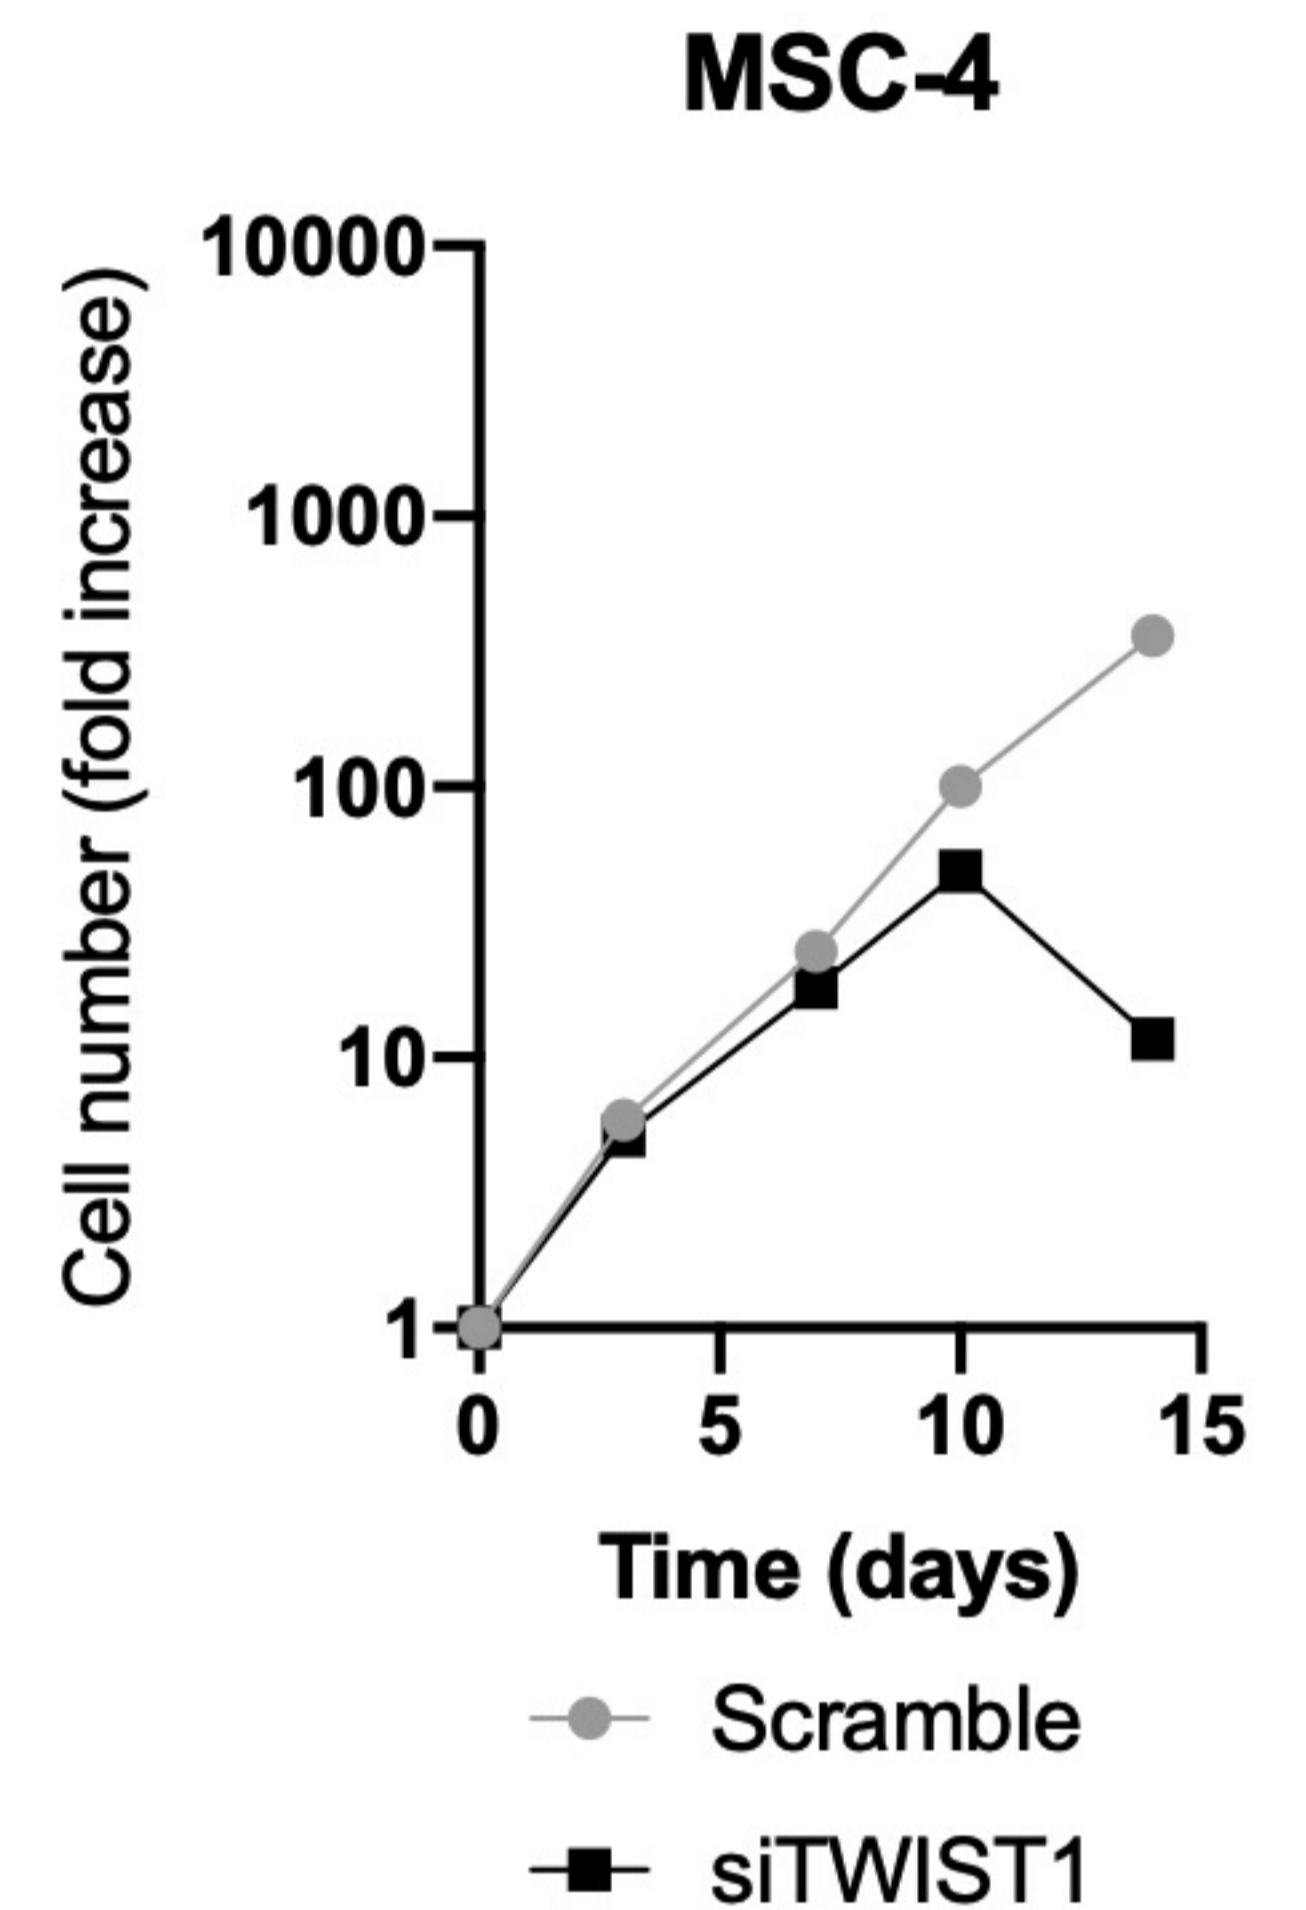**E**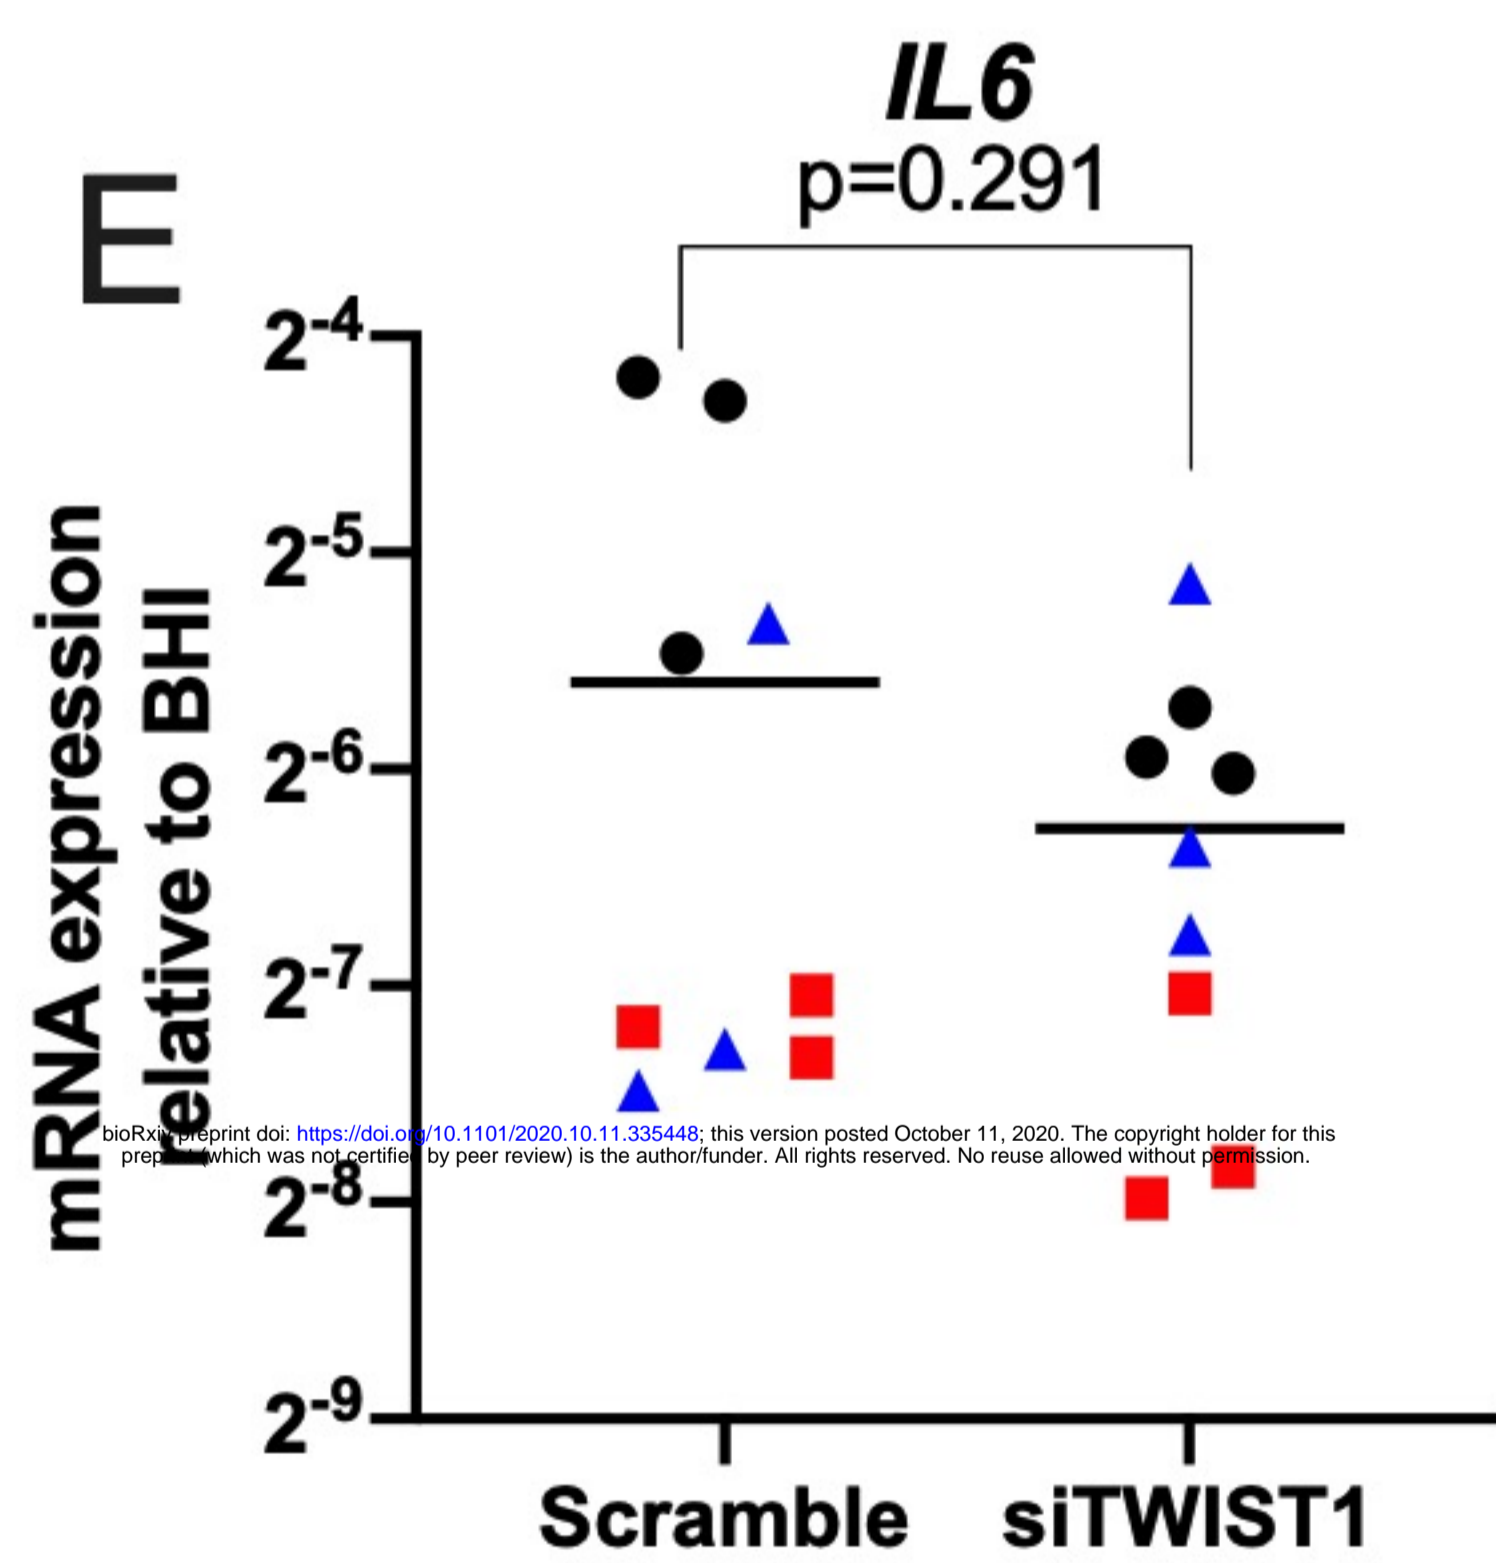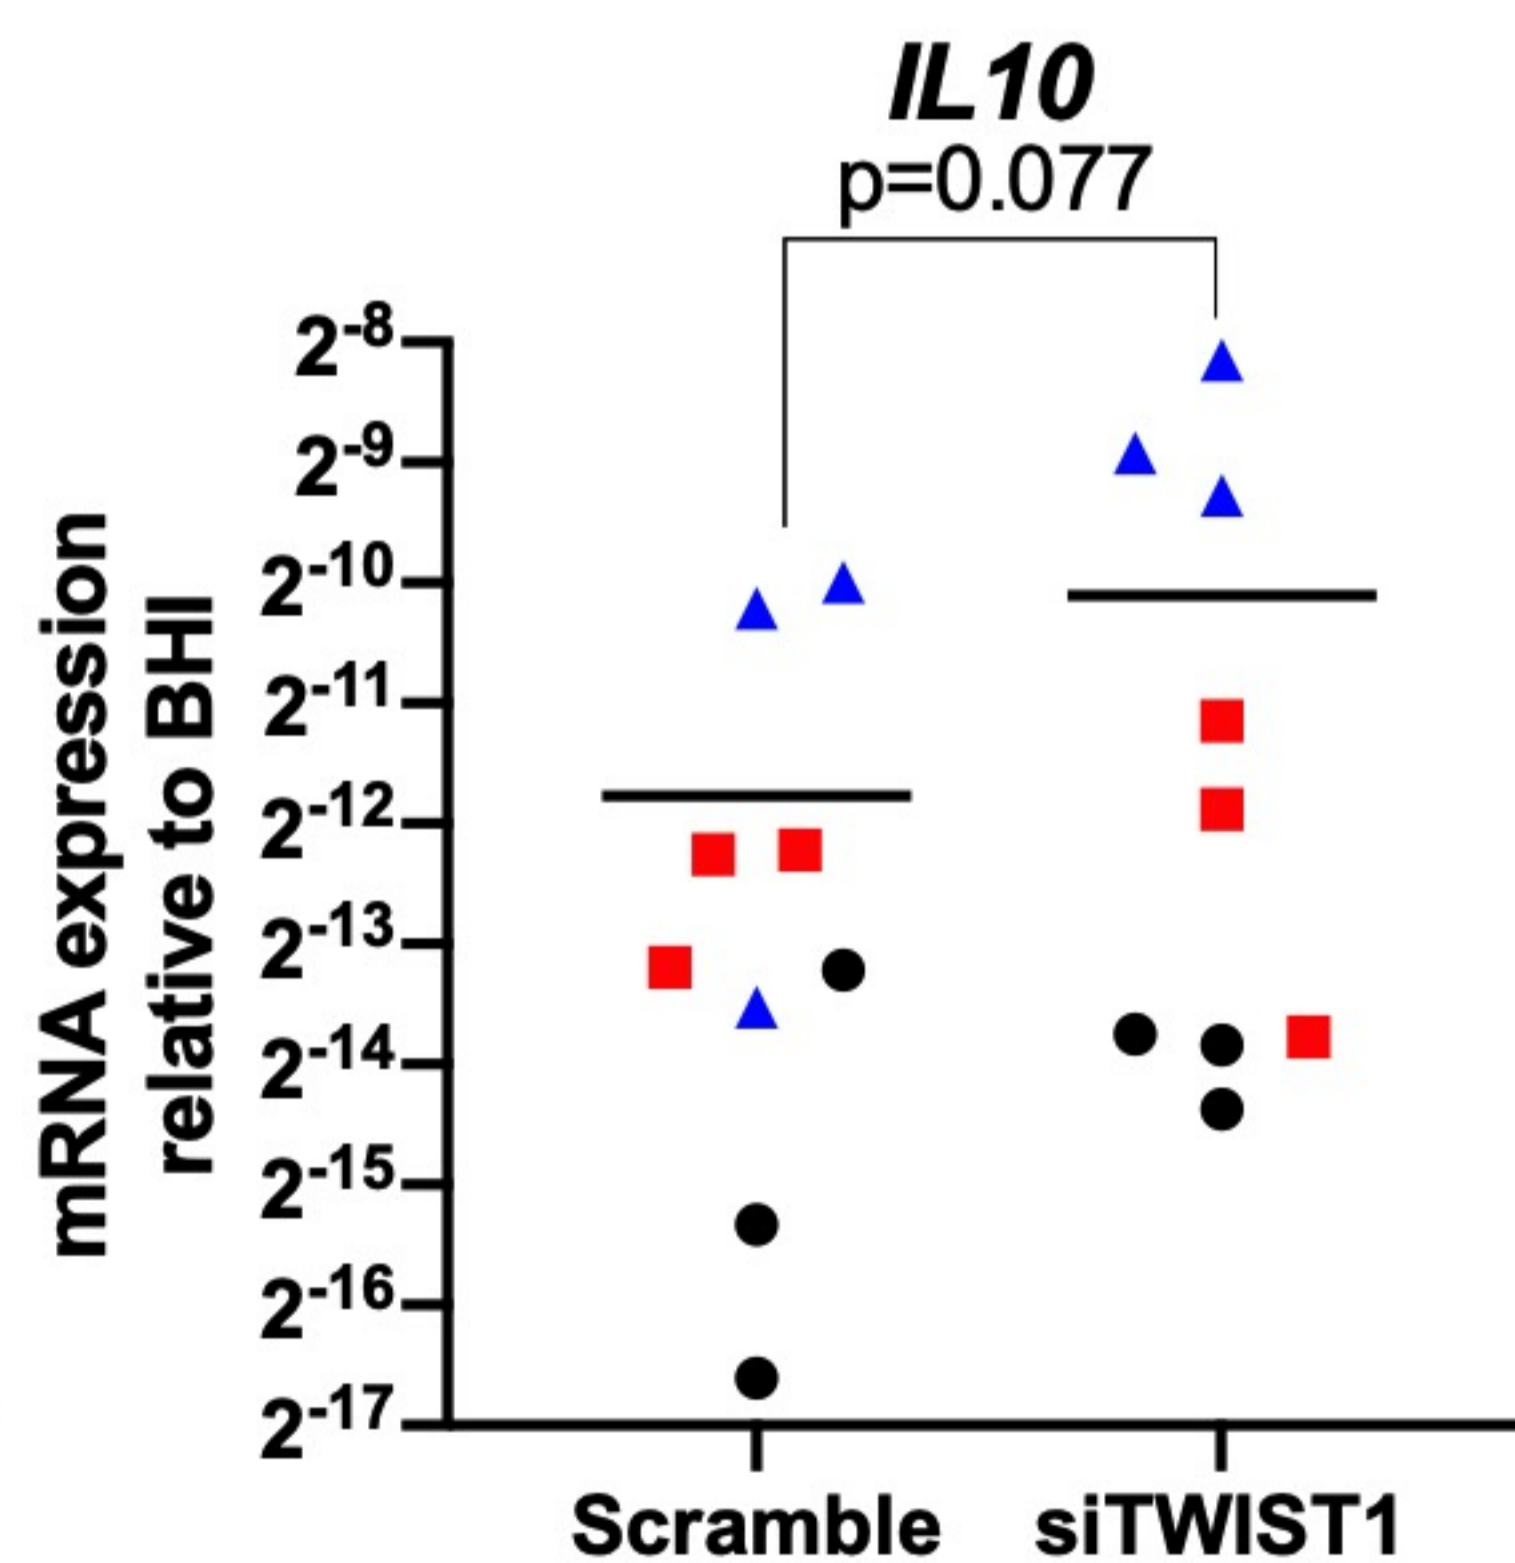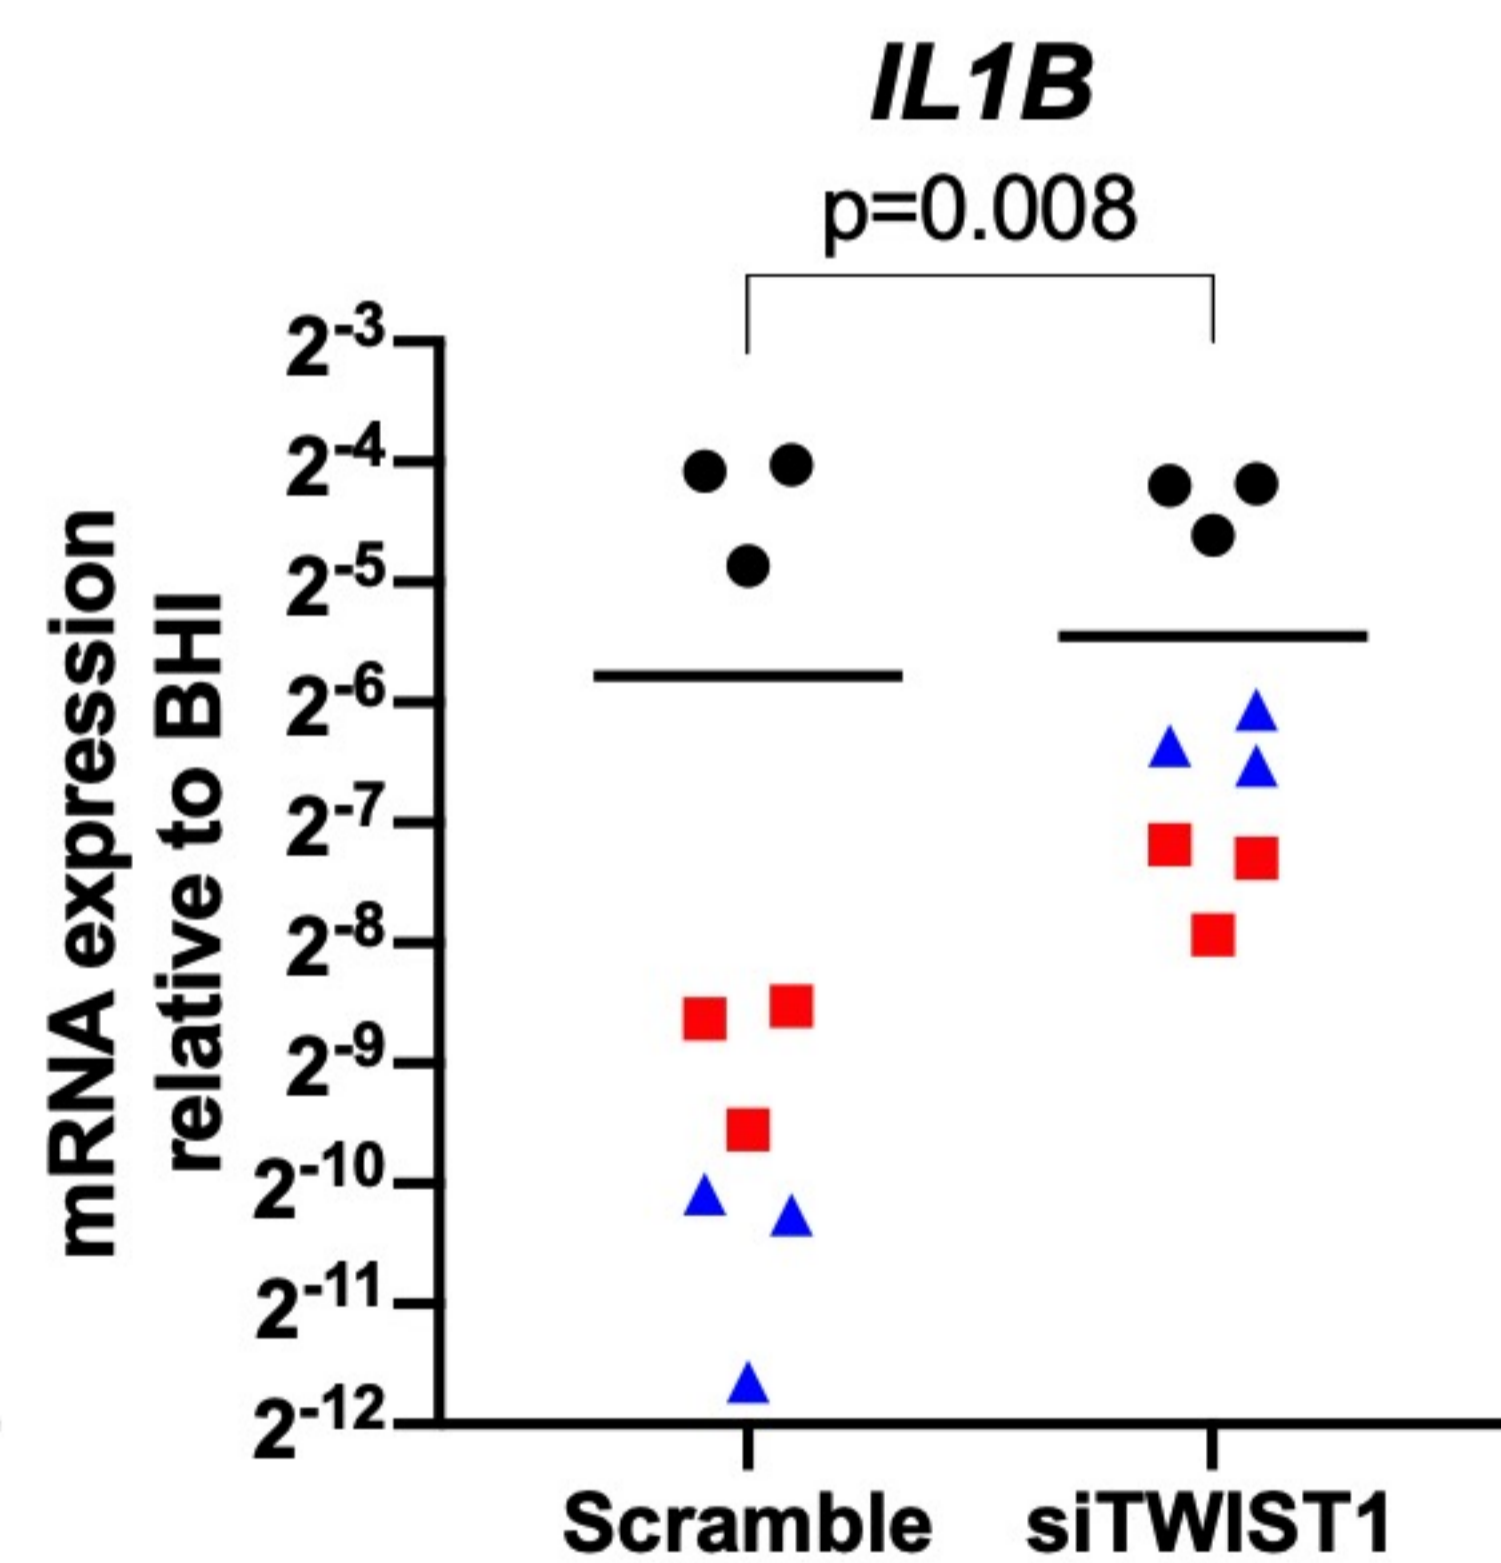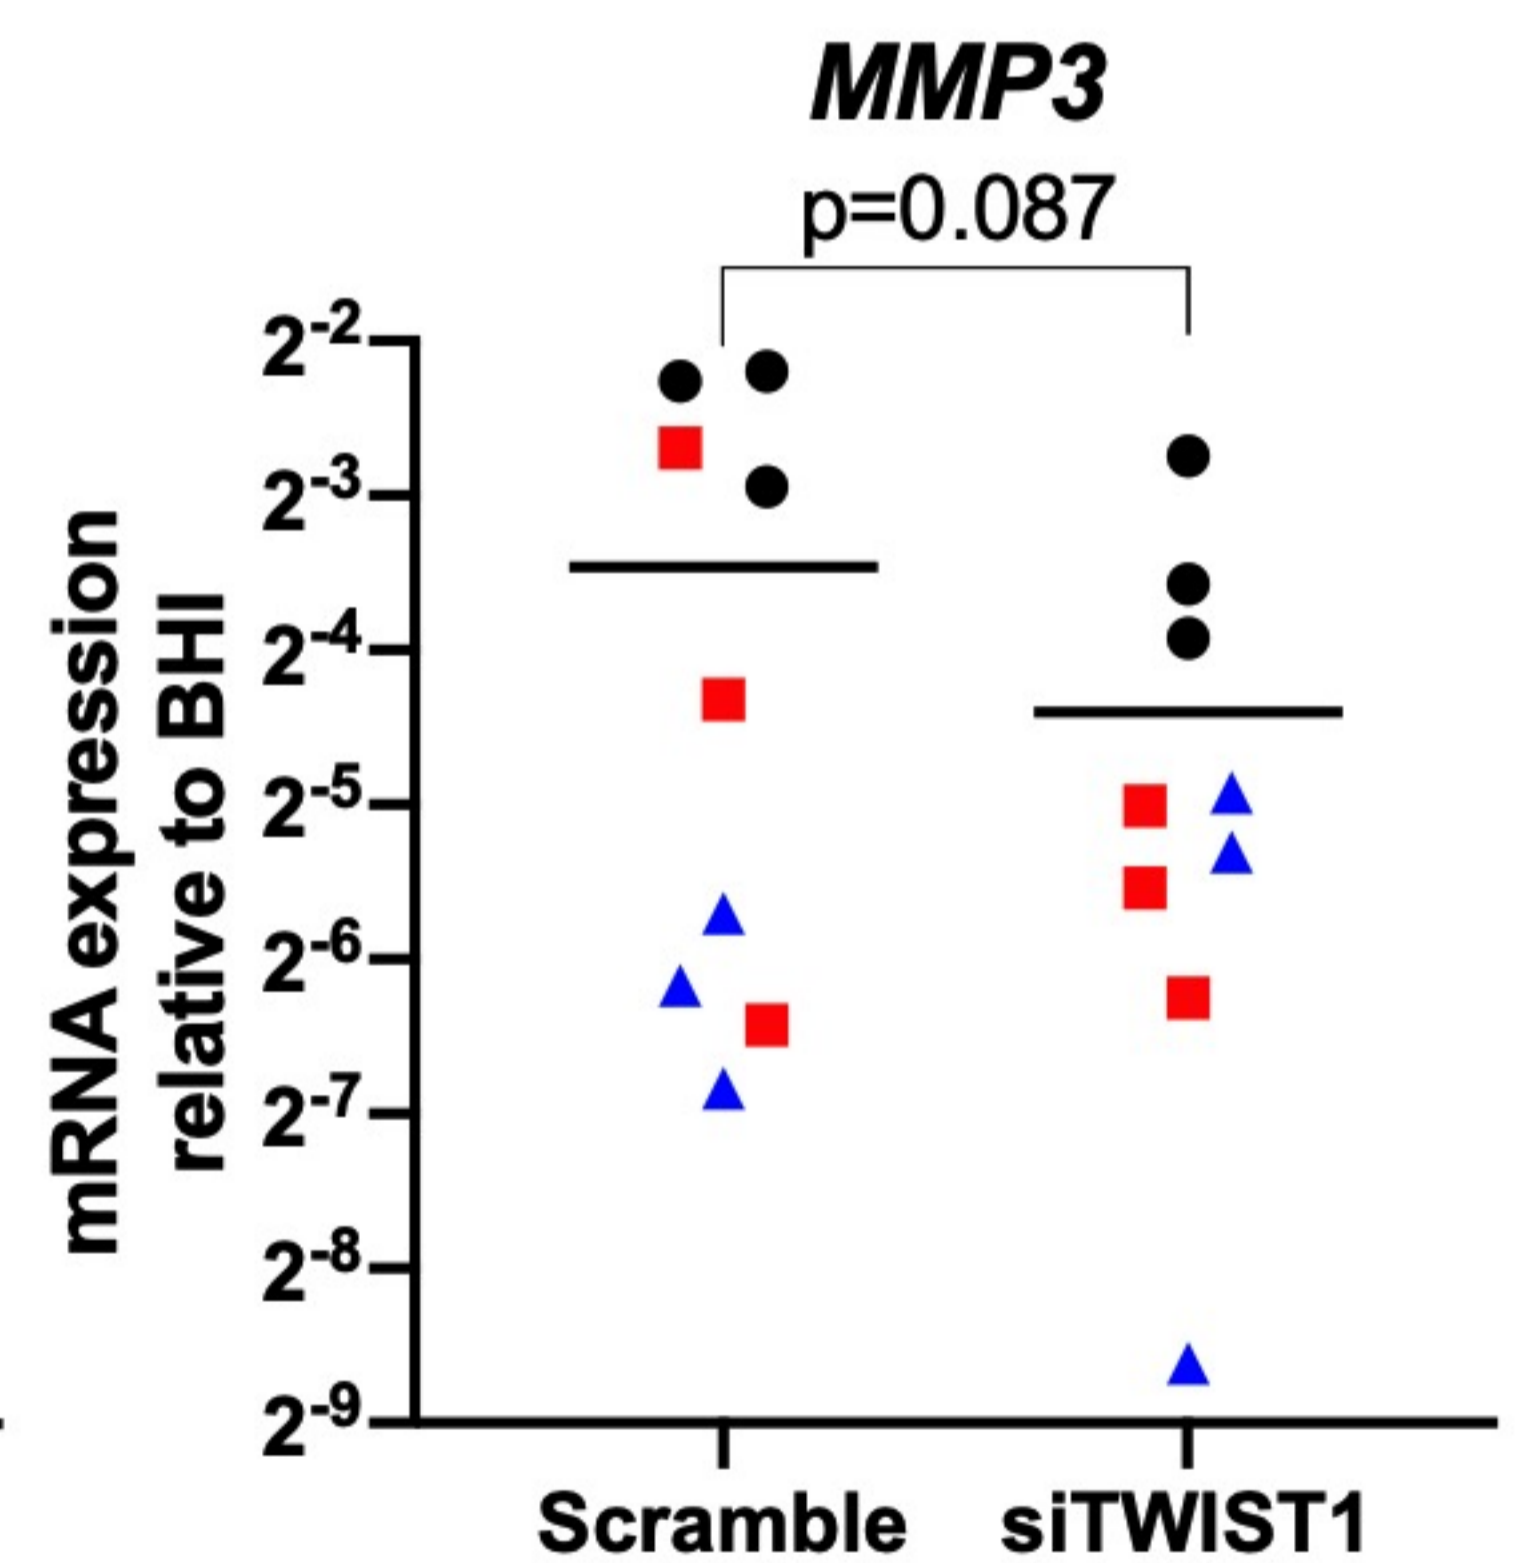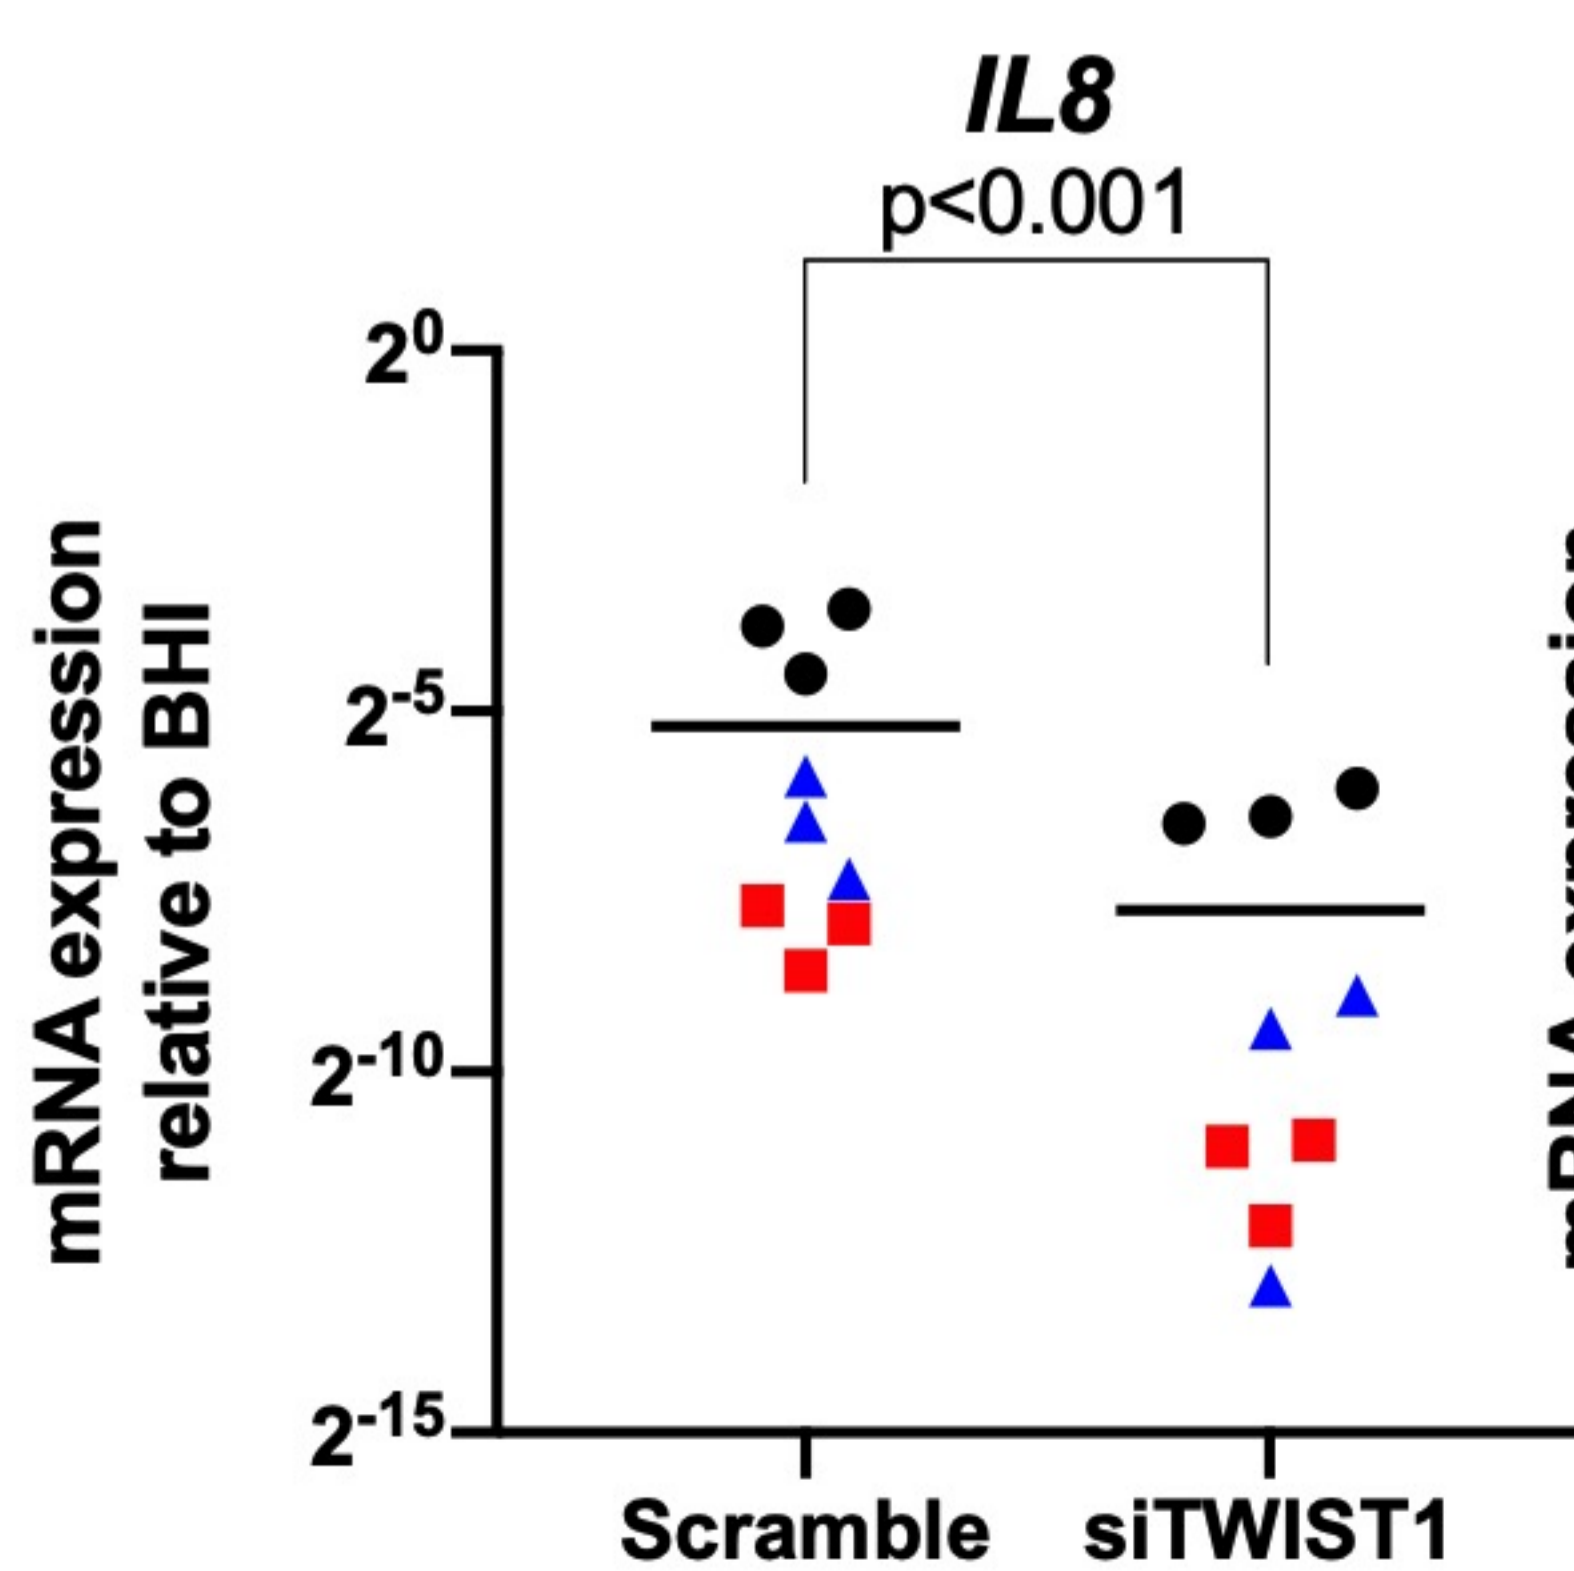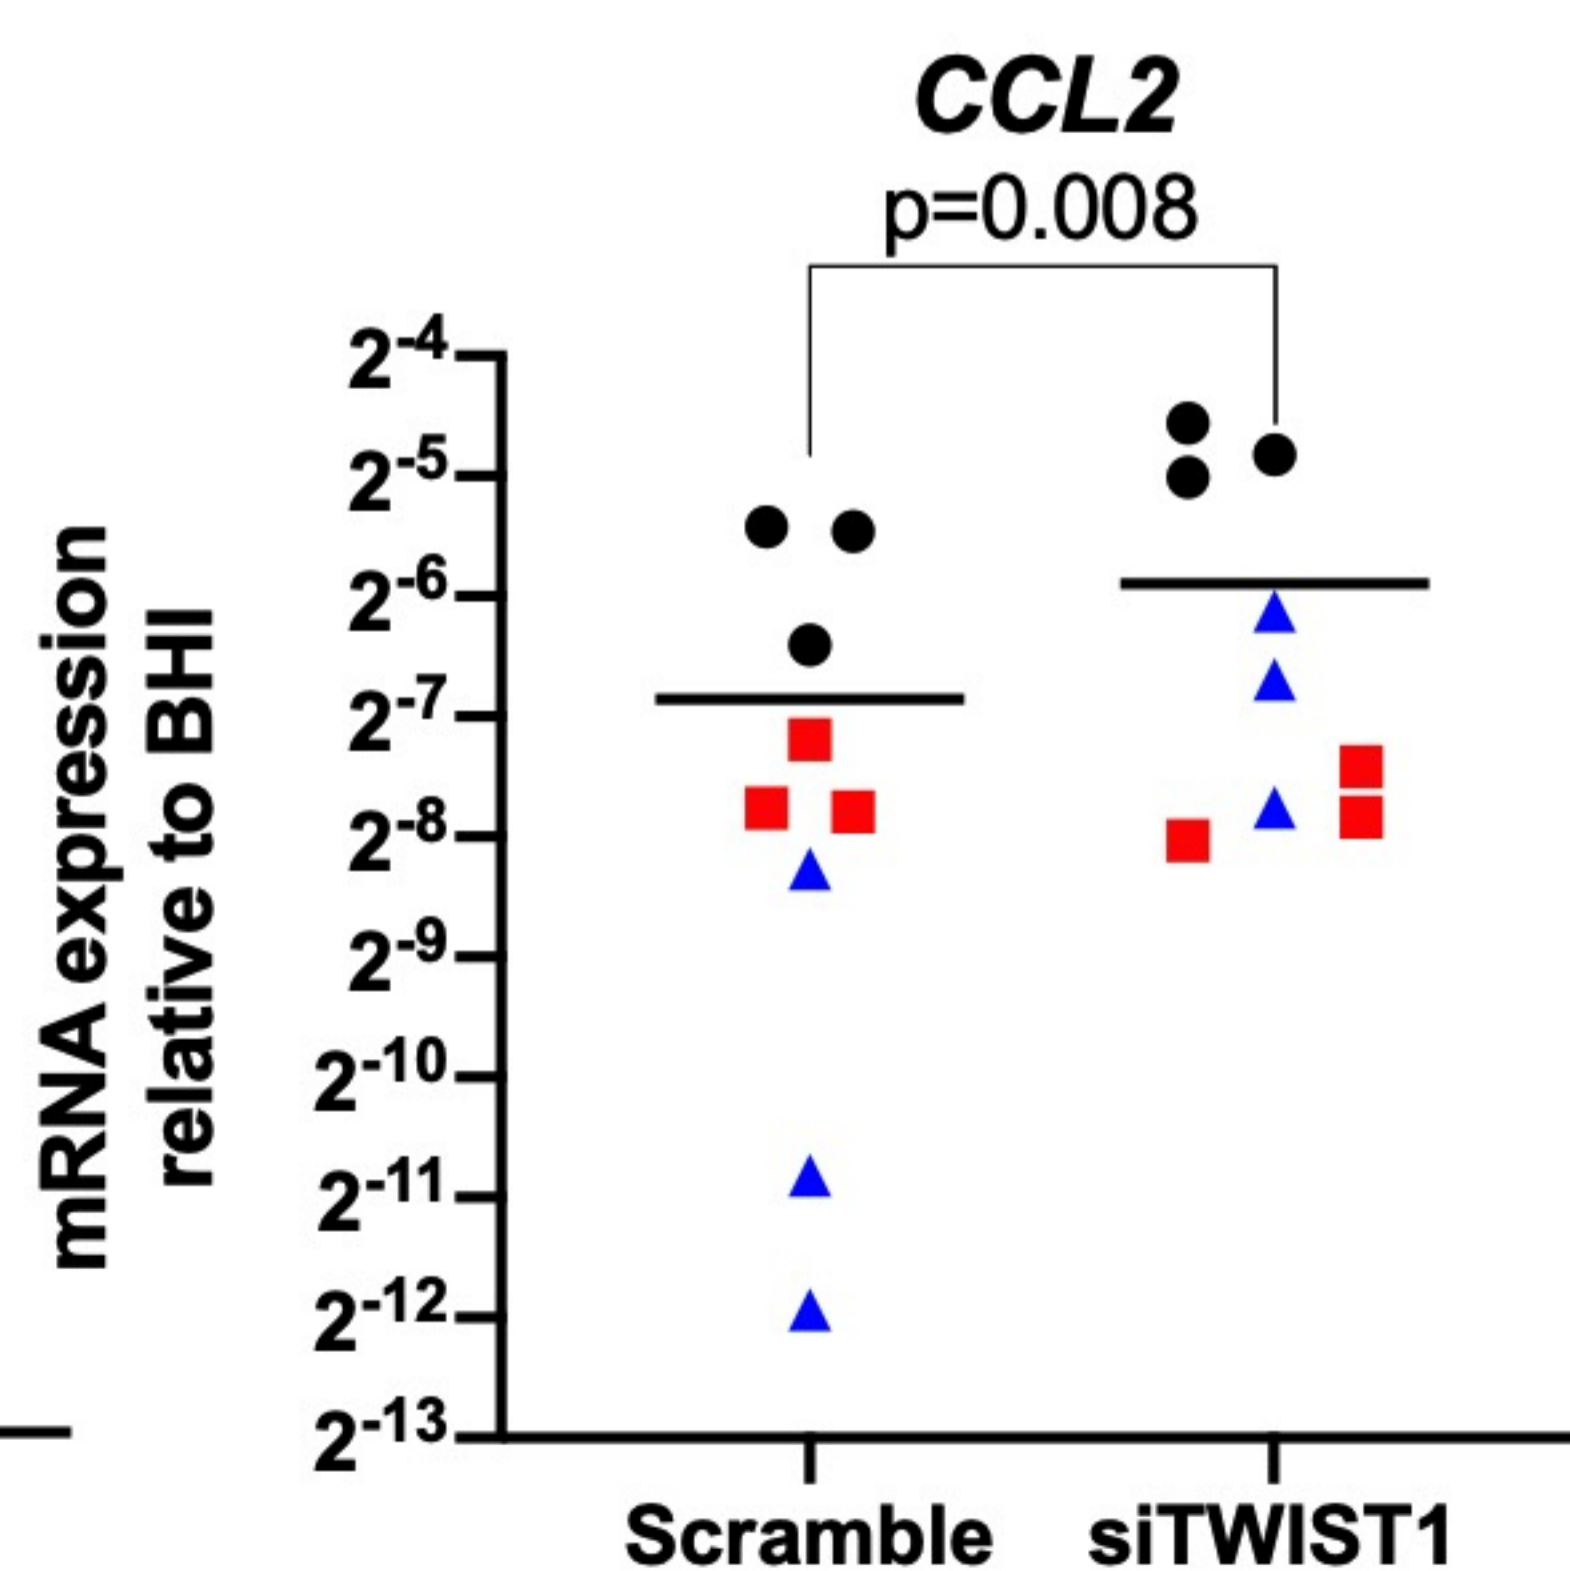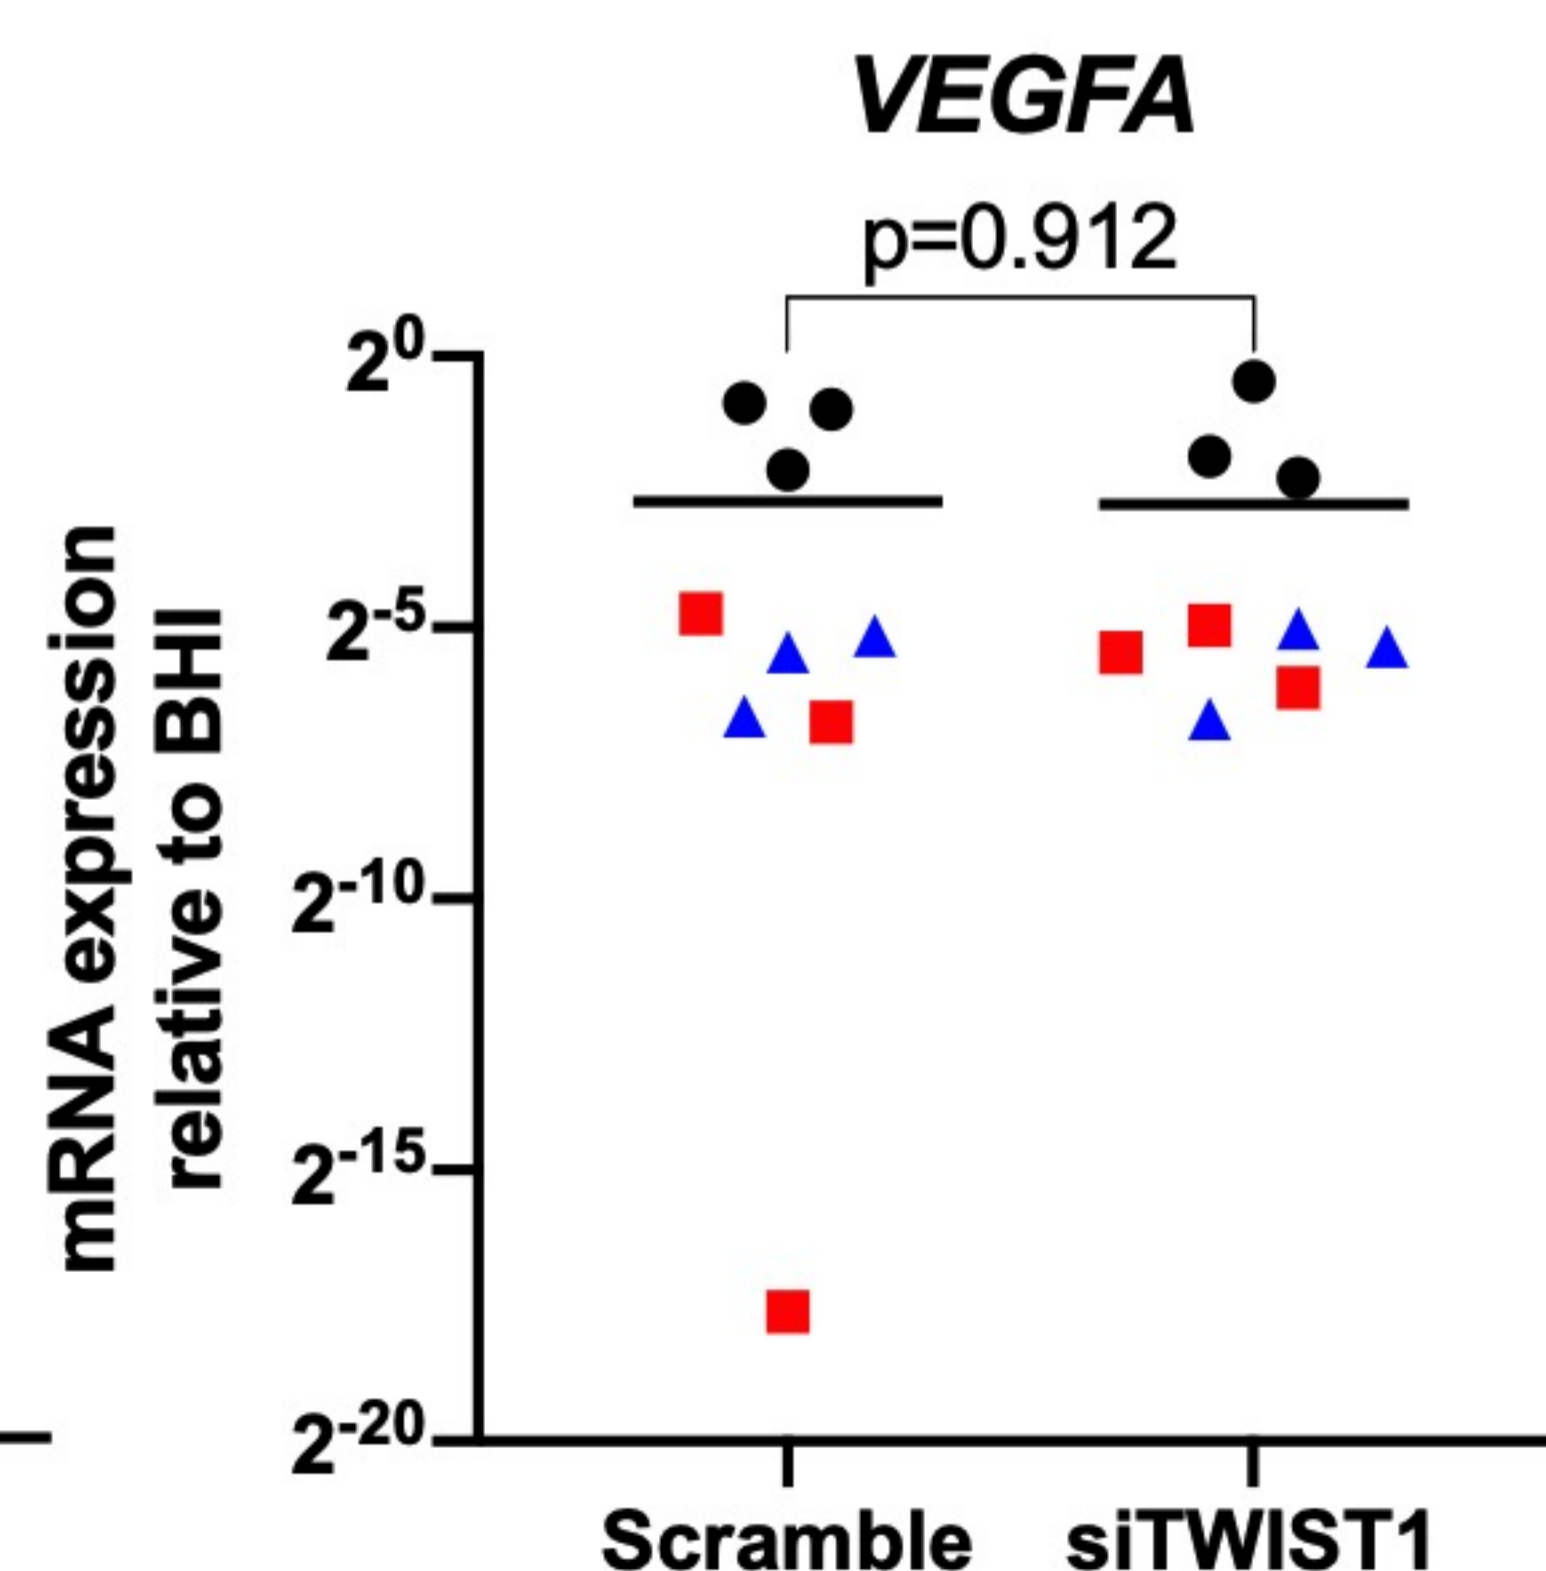

A

MSC-6

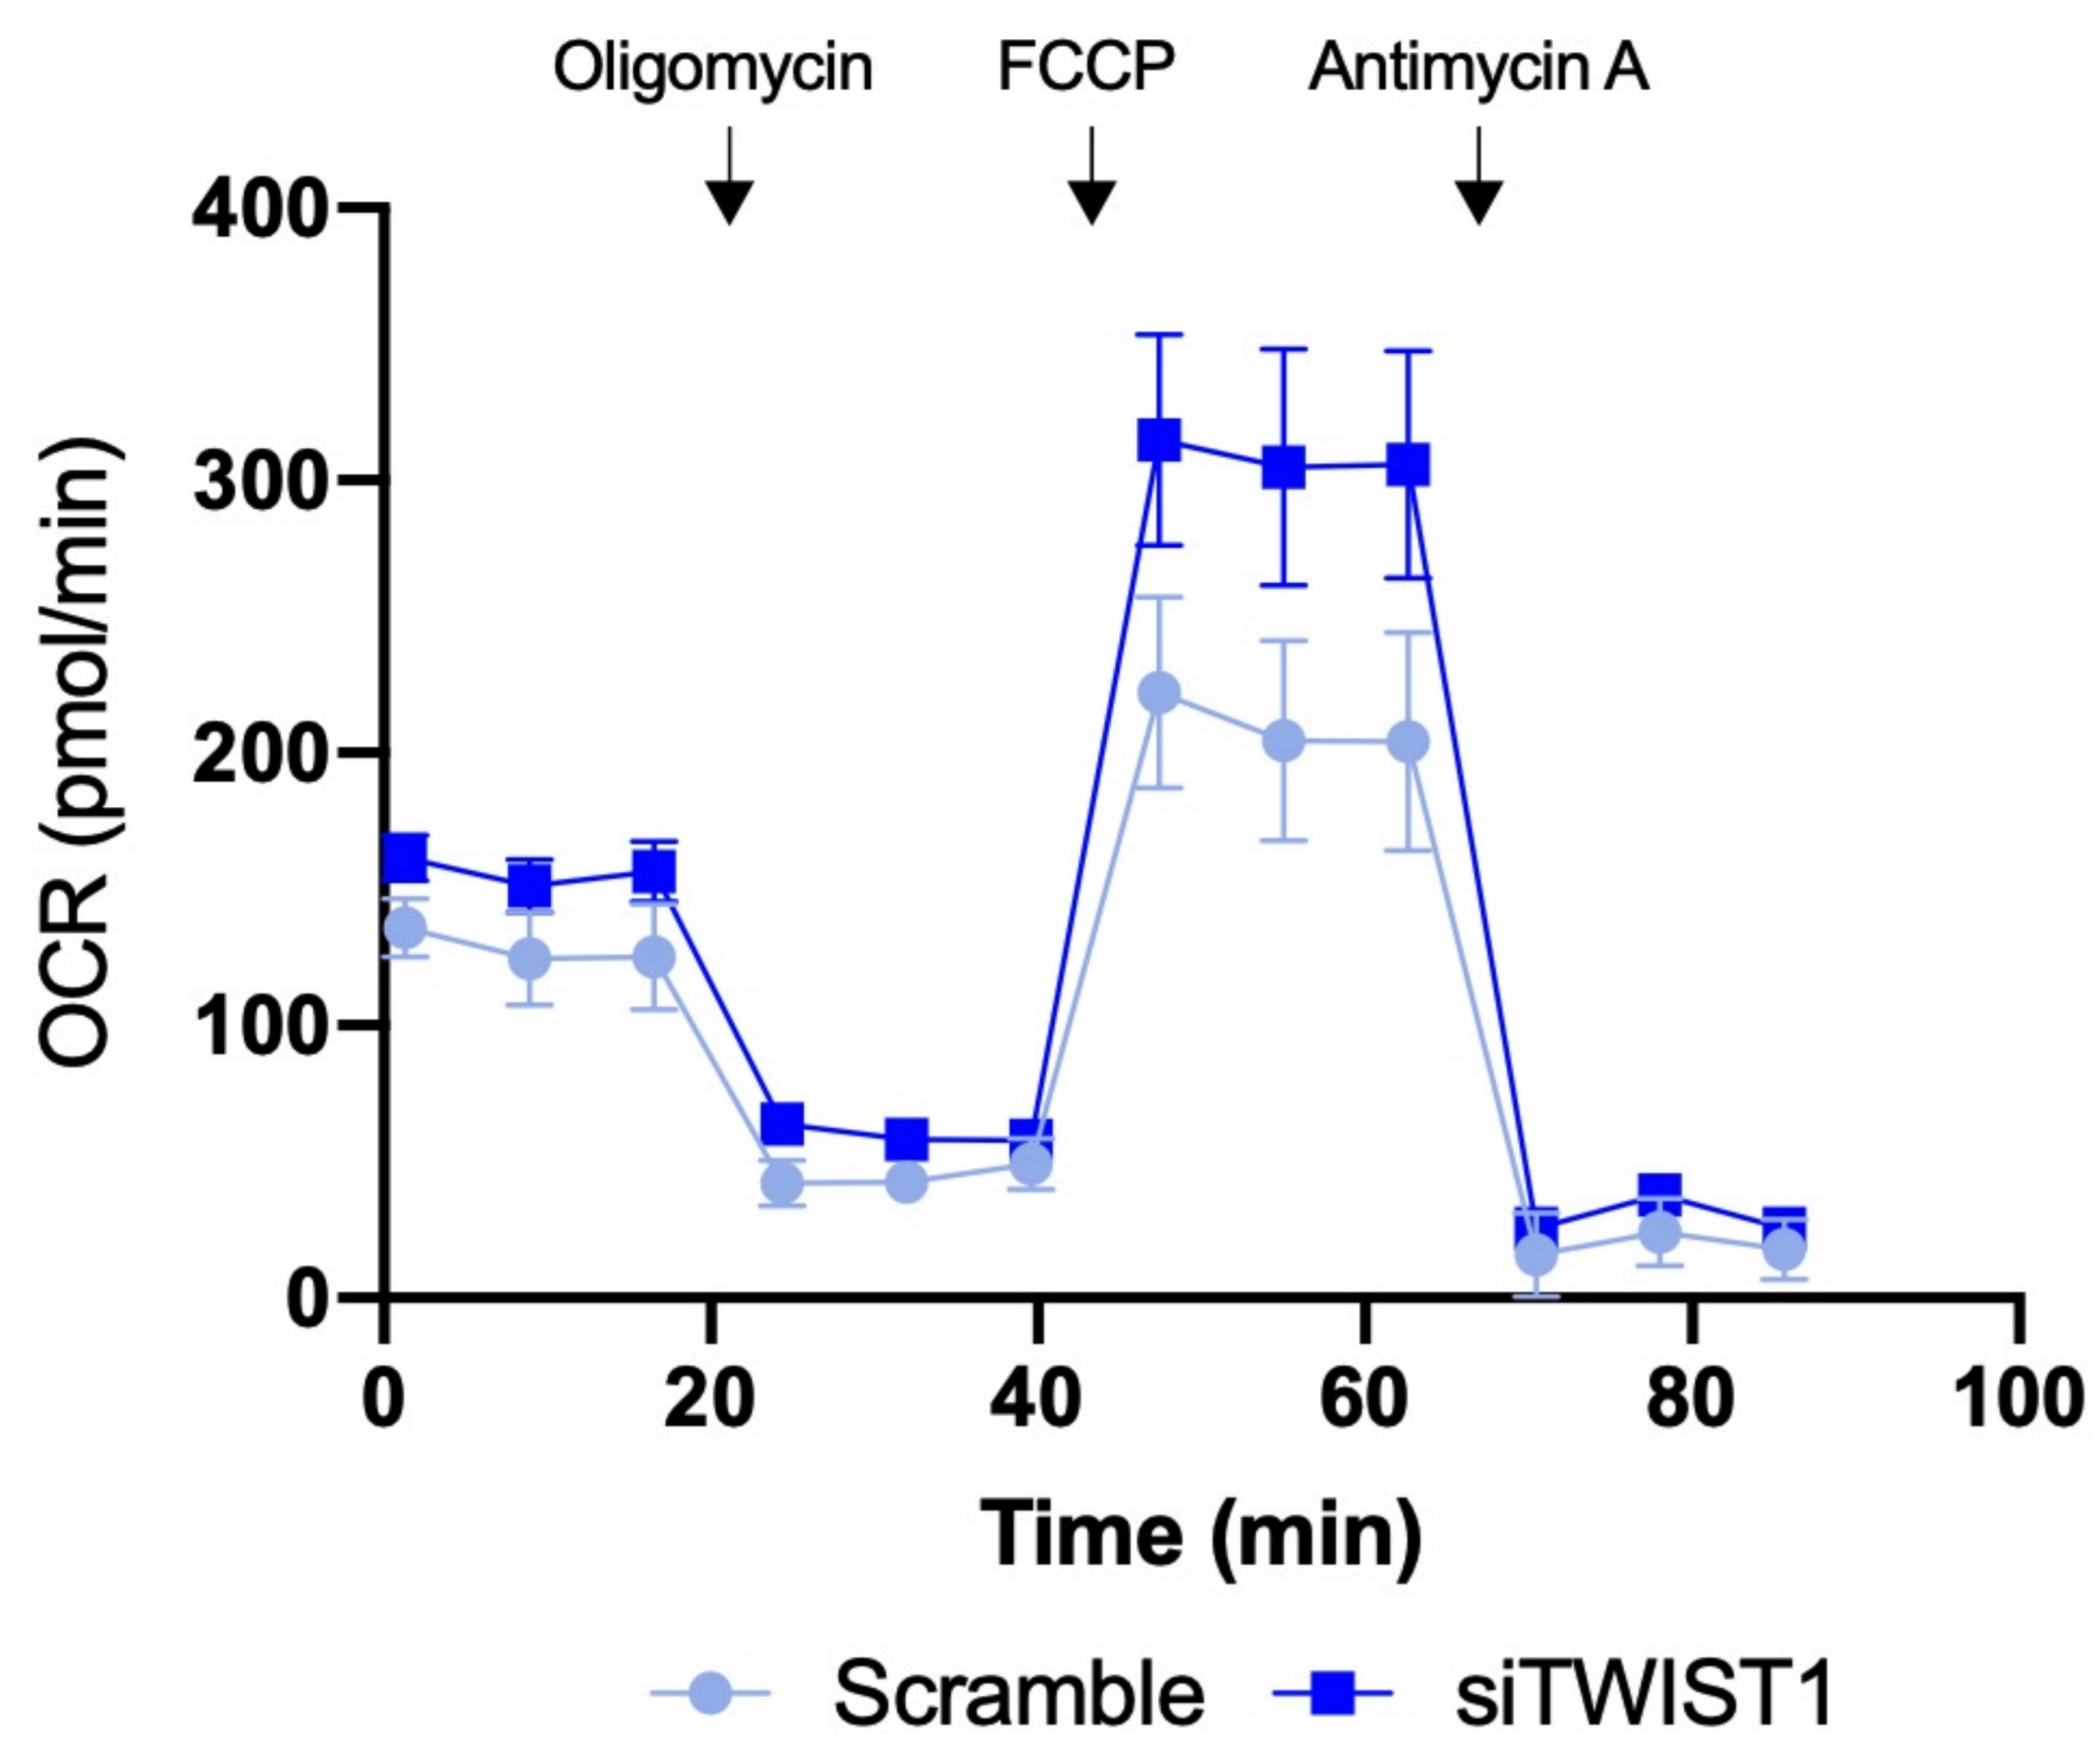

B

MSC-7

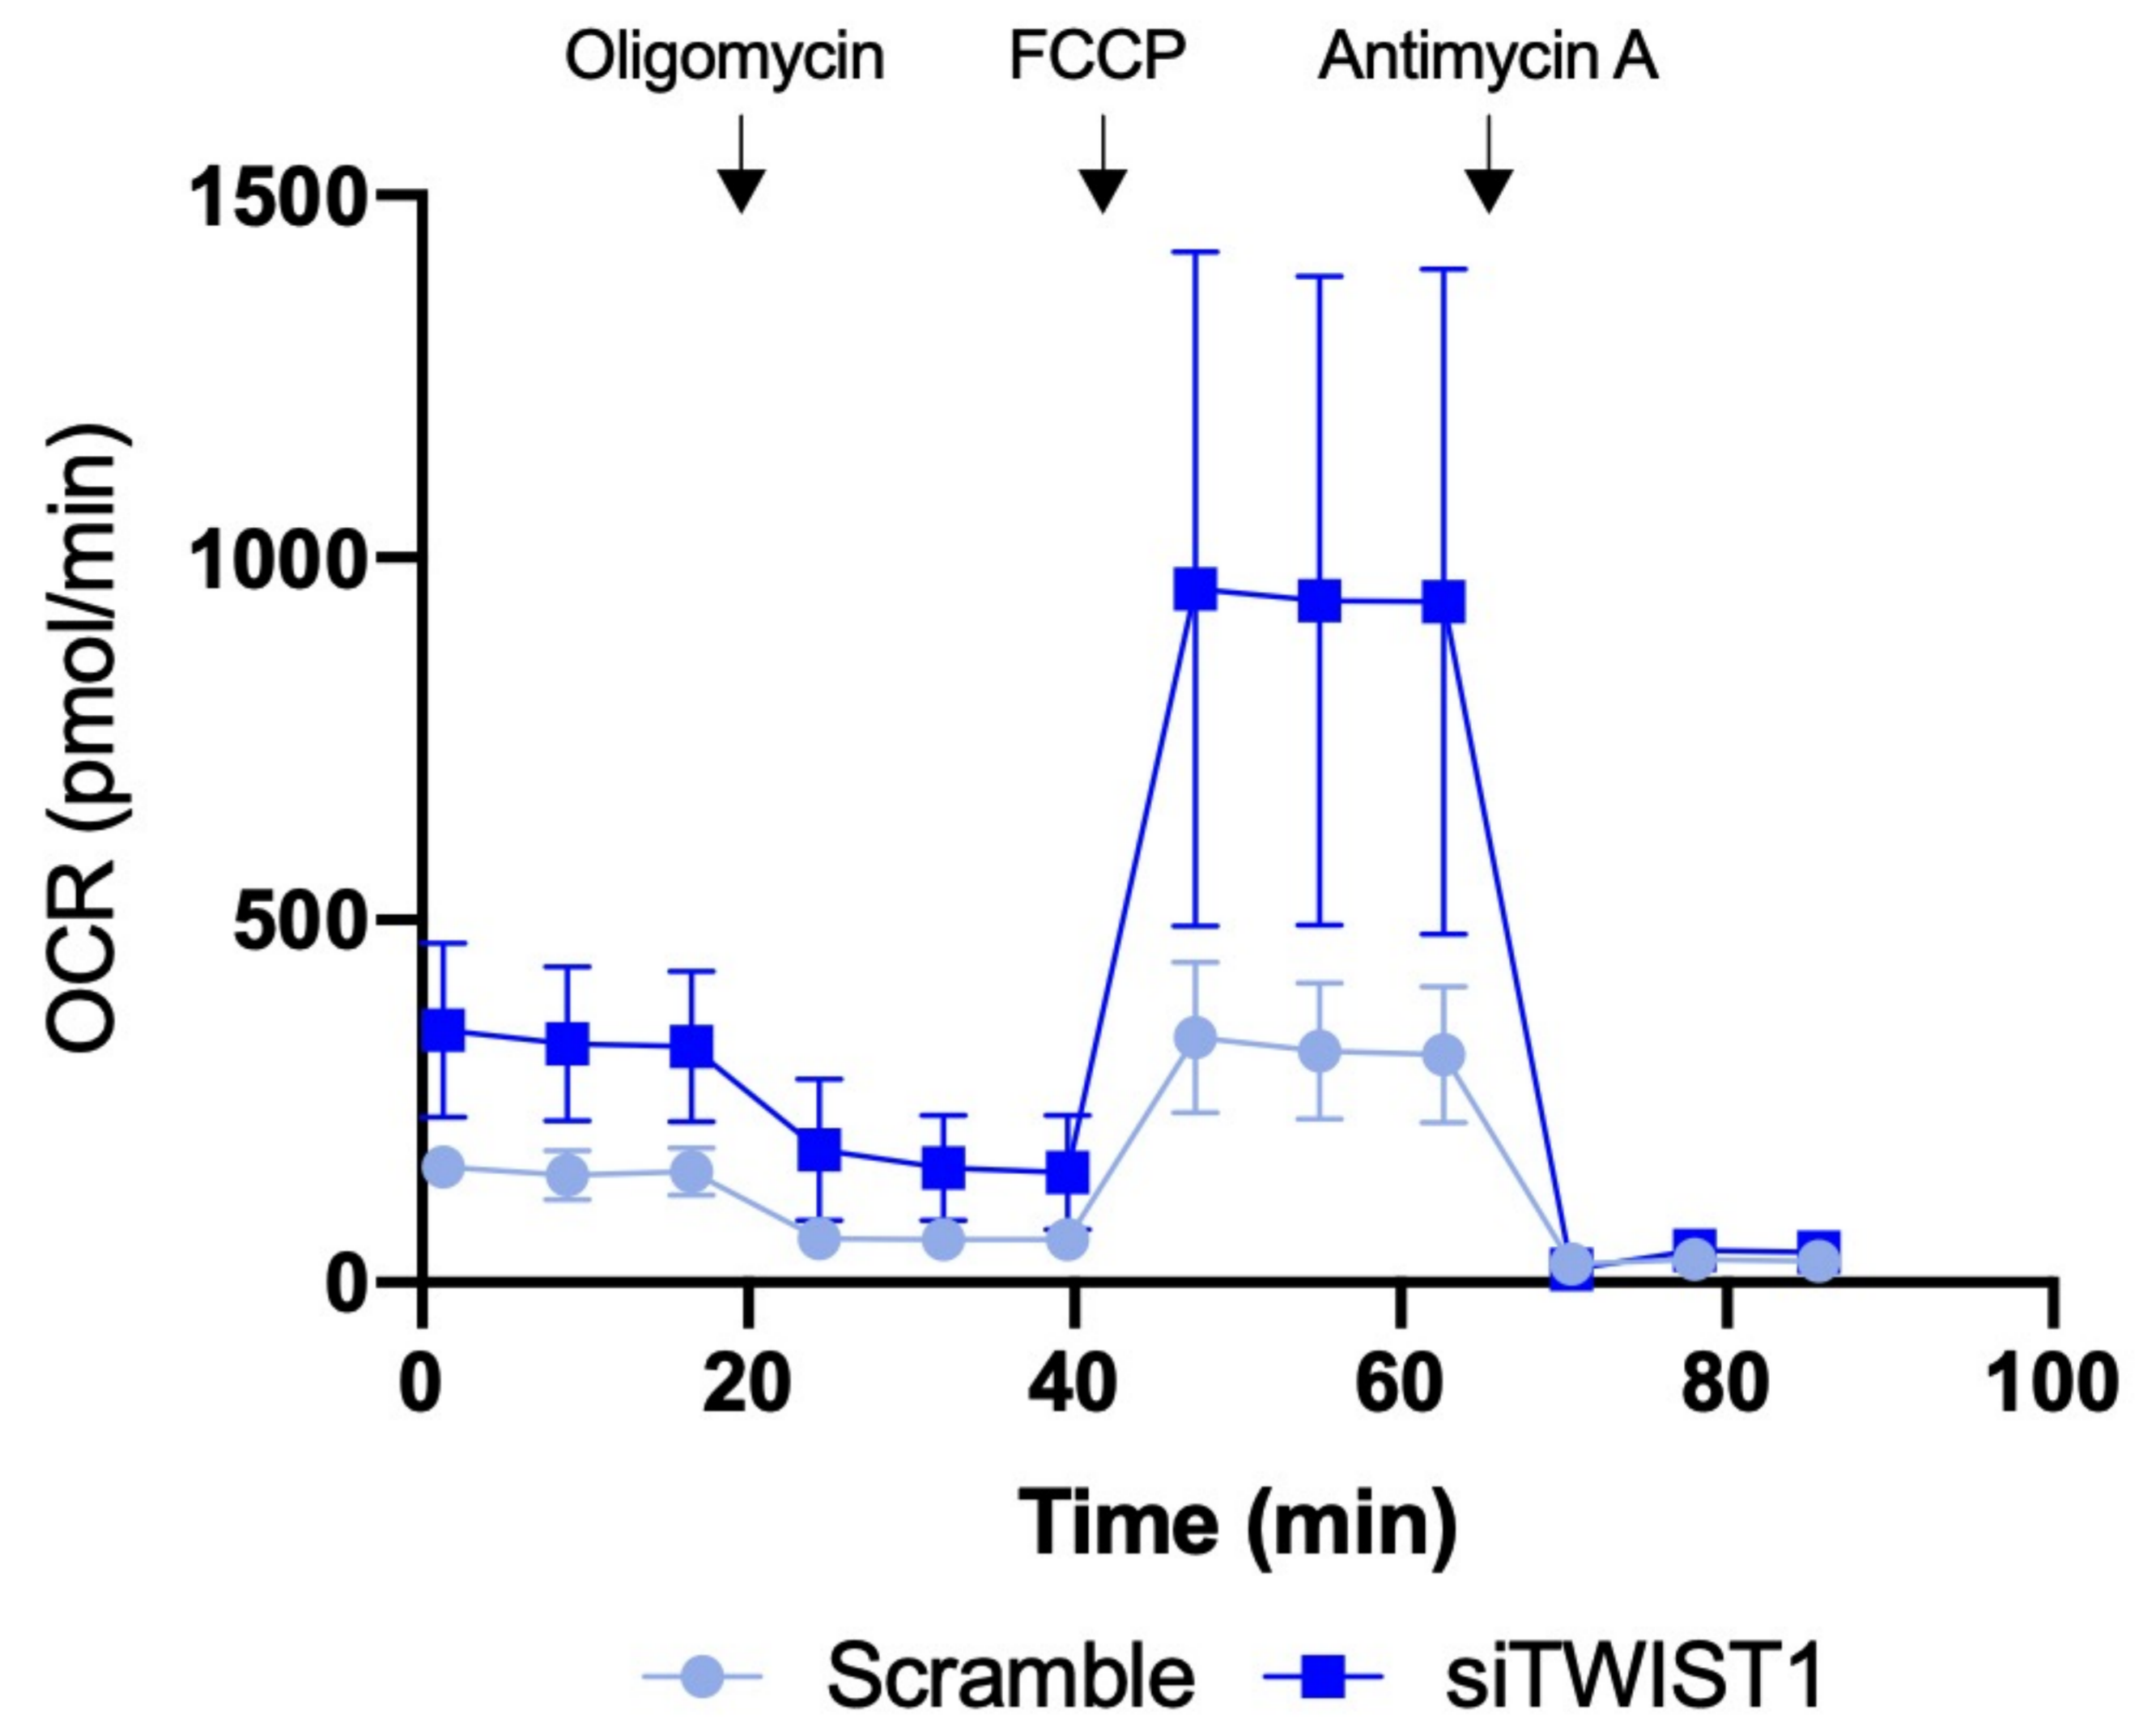

C

Basal OCR

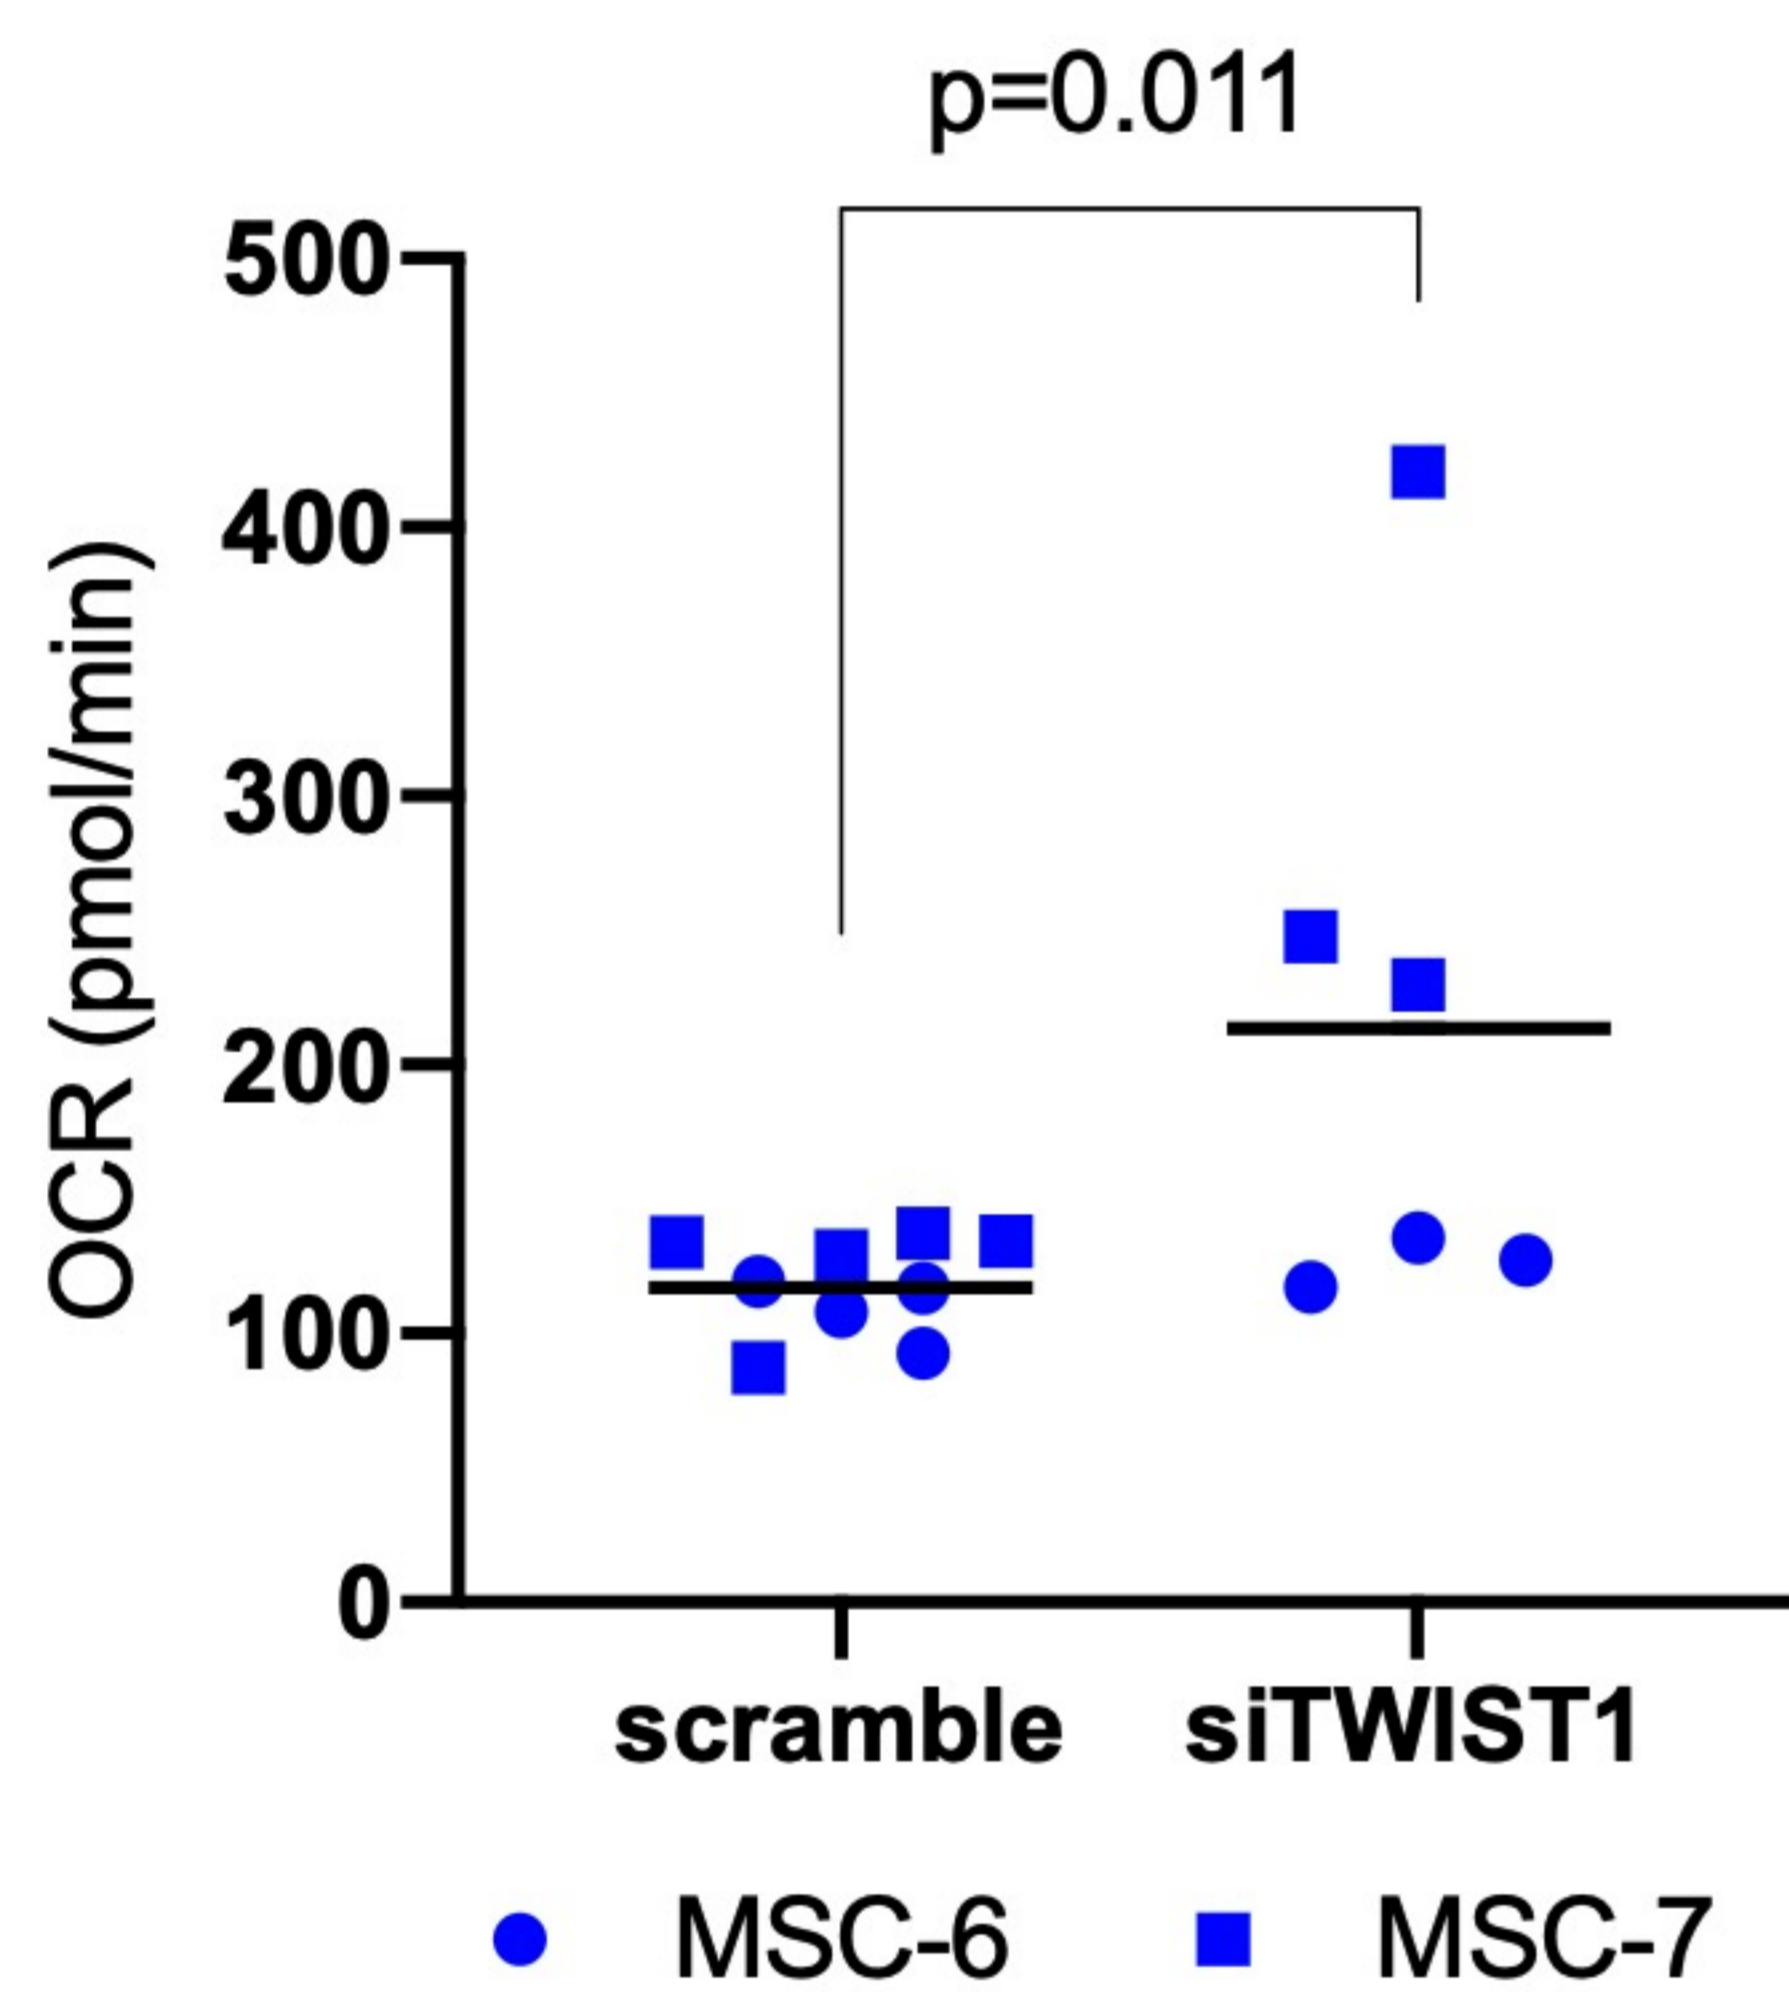

D

Maximum OCR

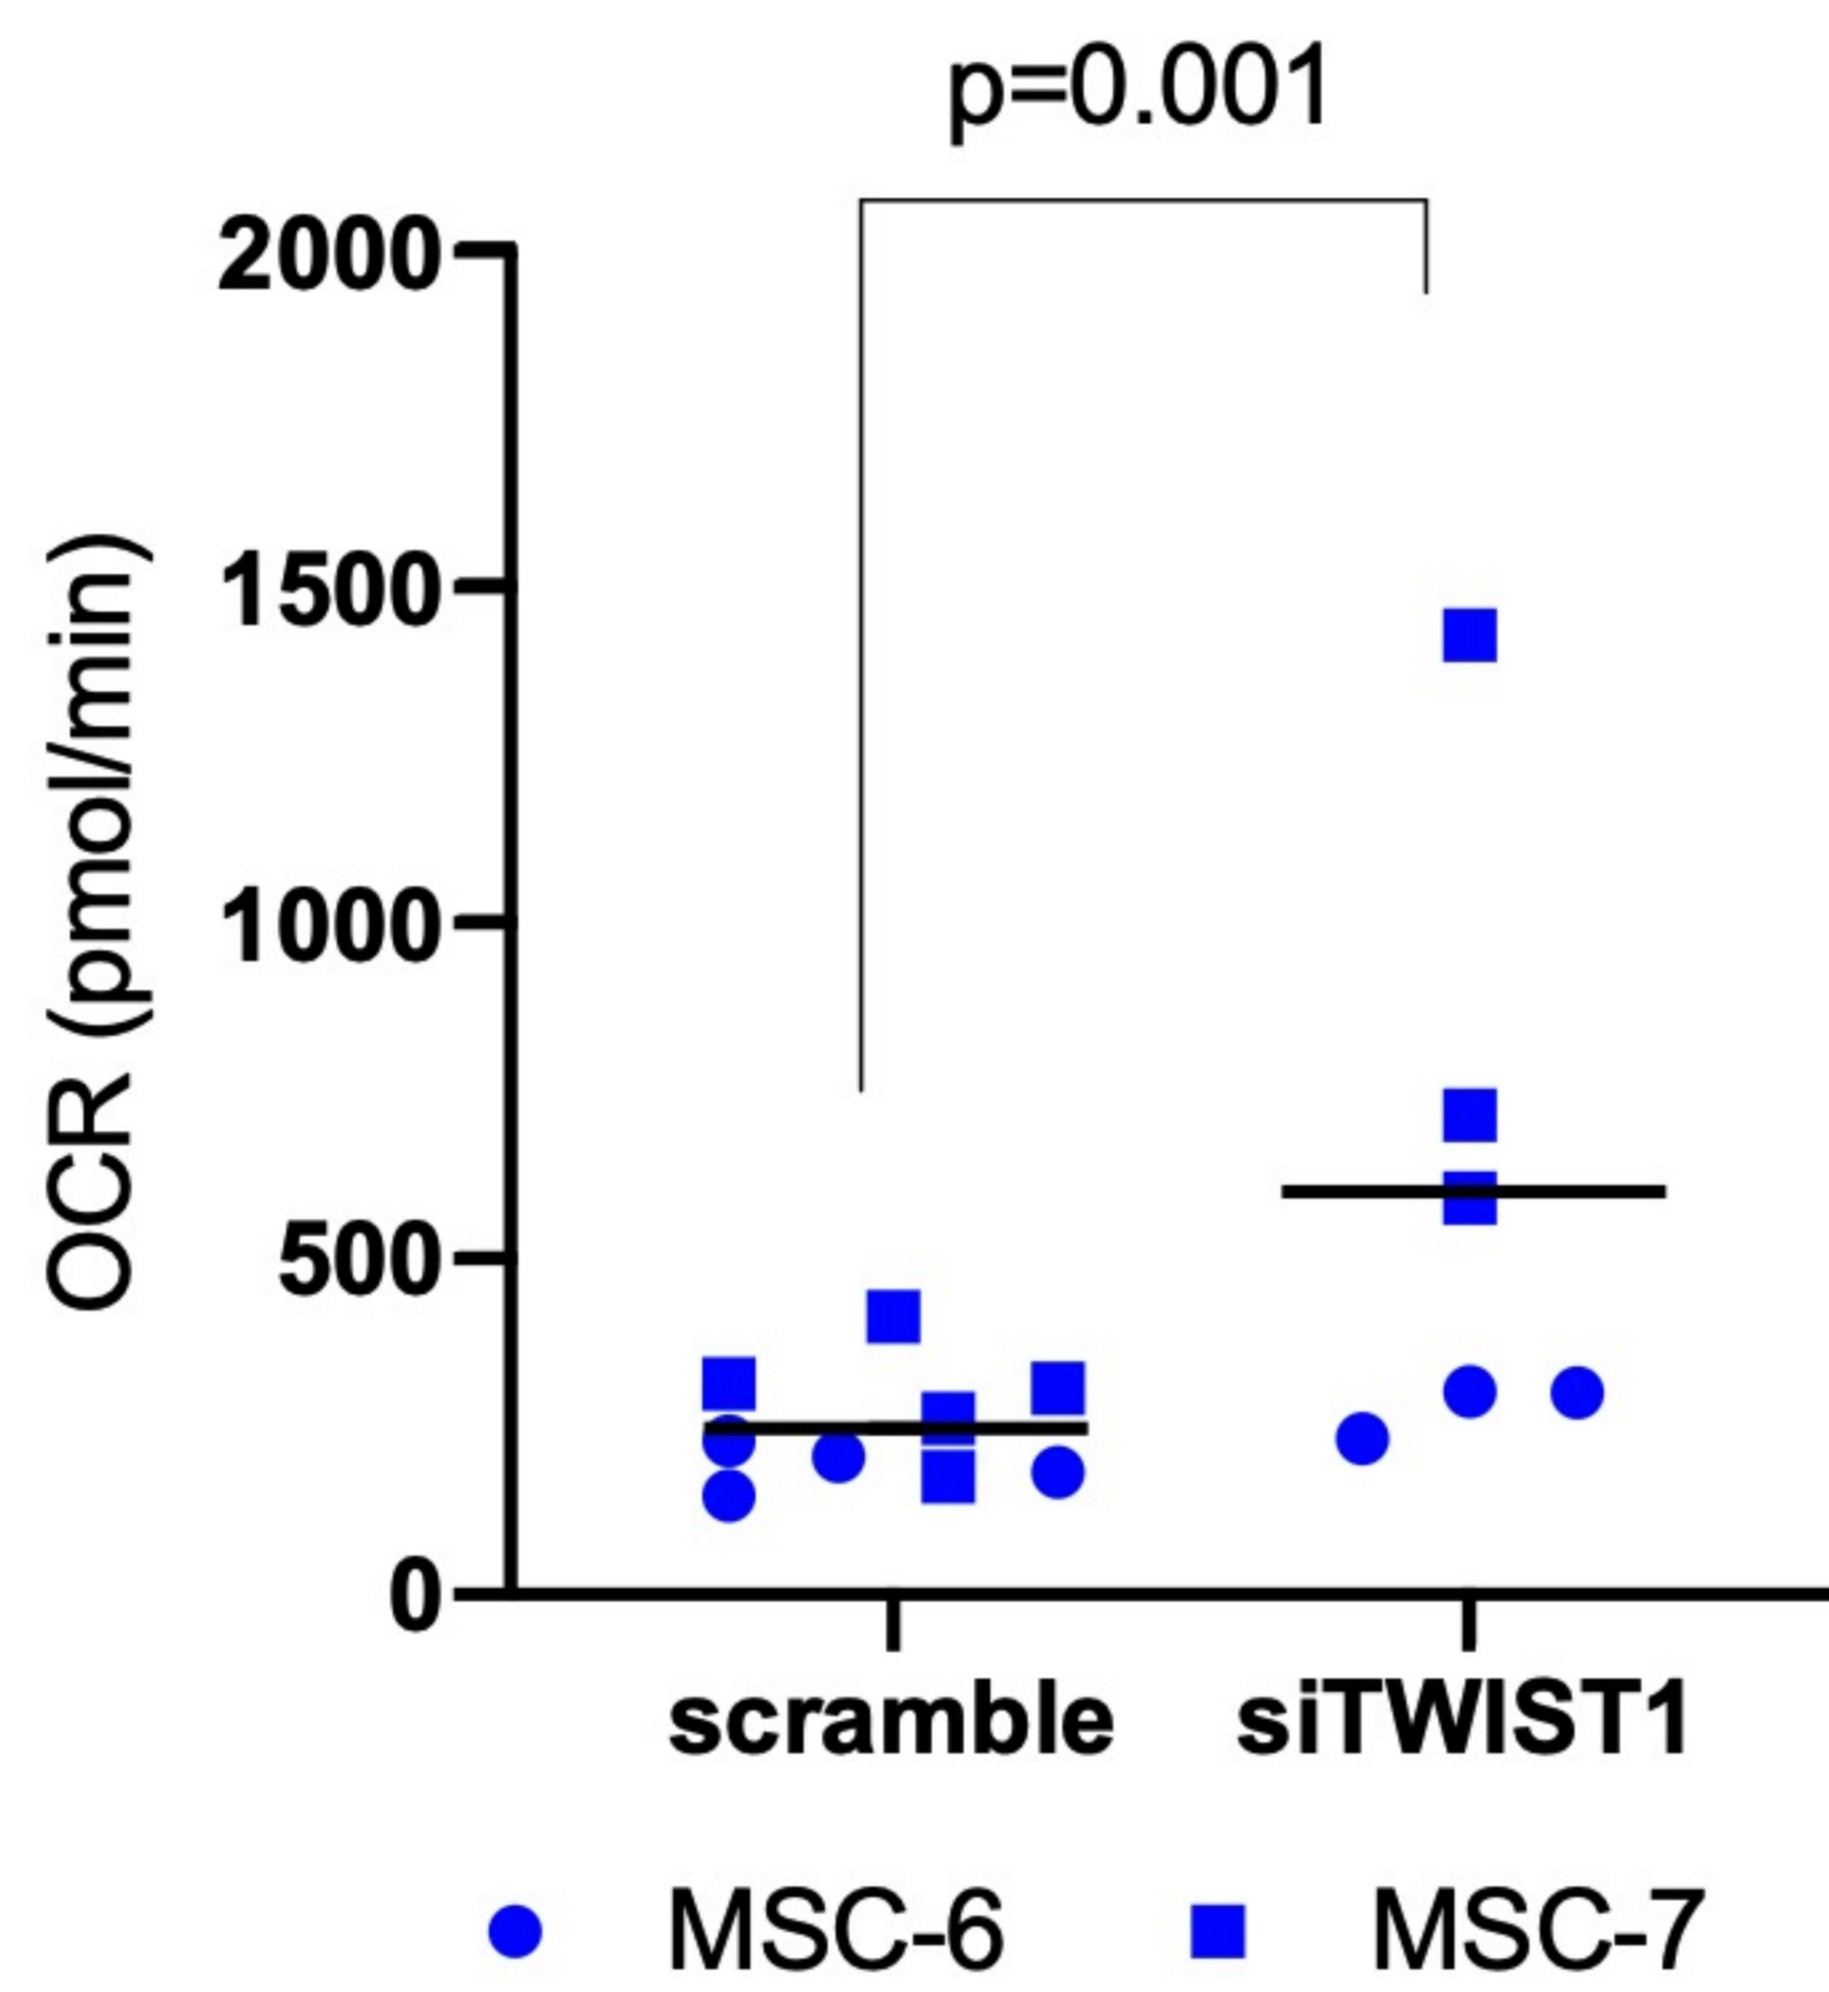

E

Proton leak

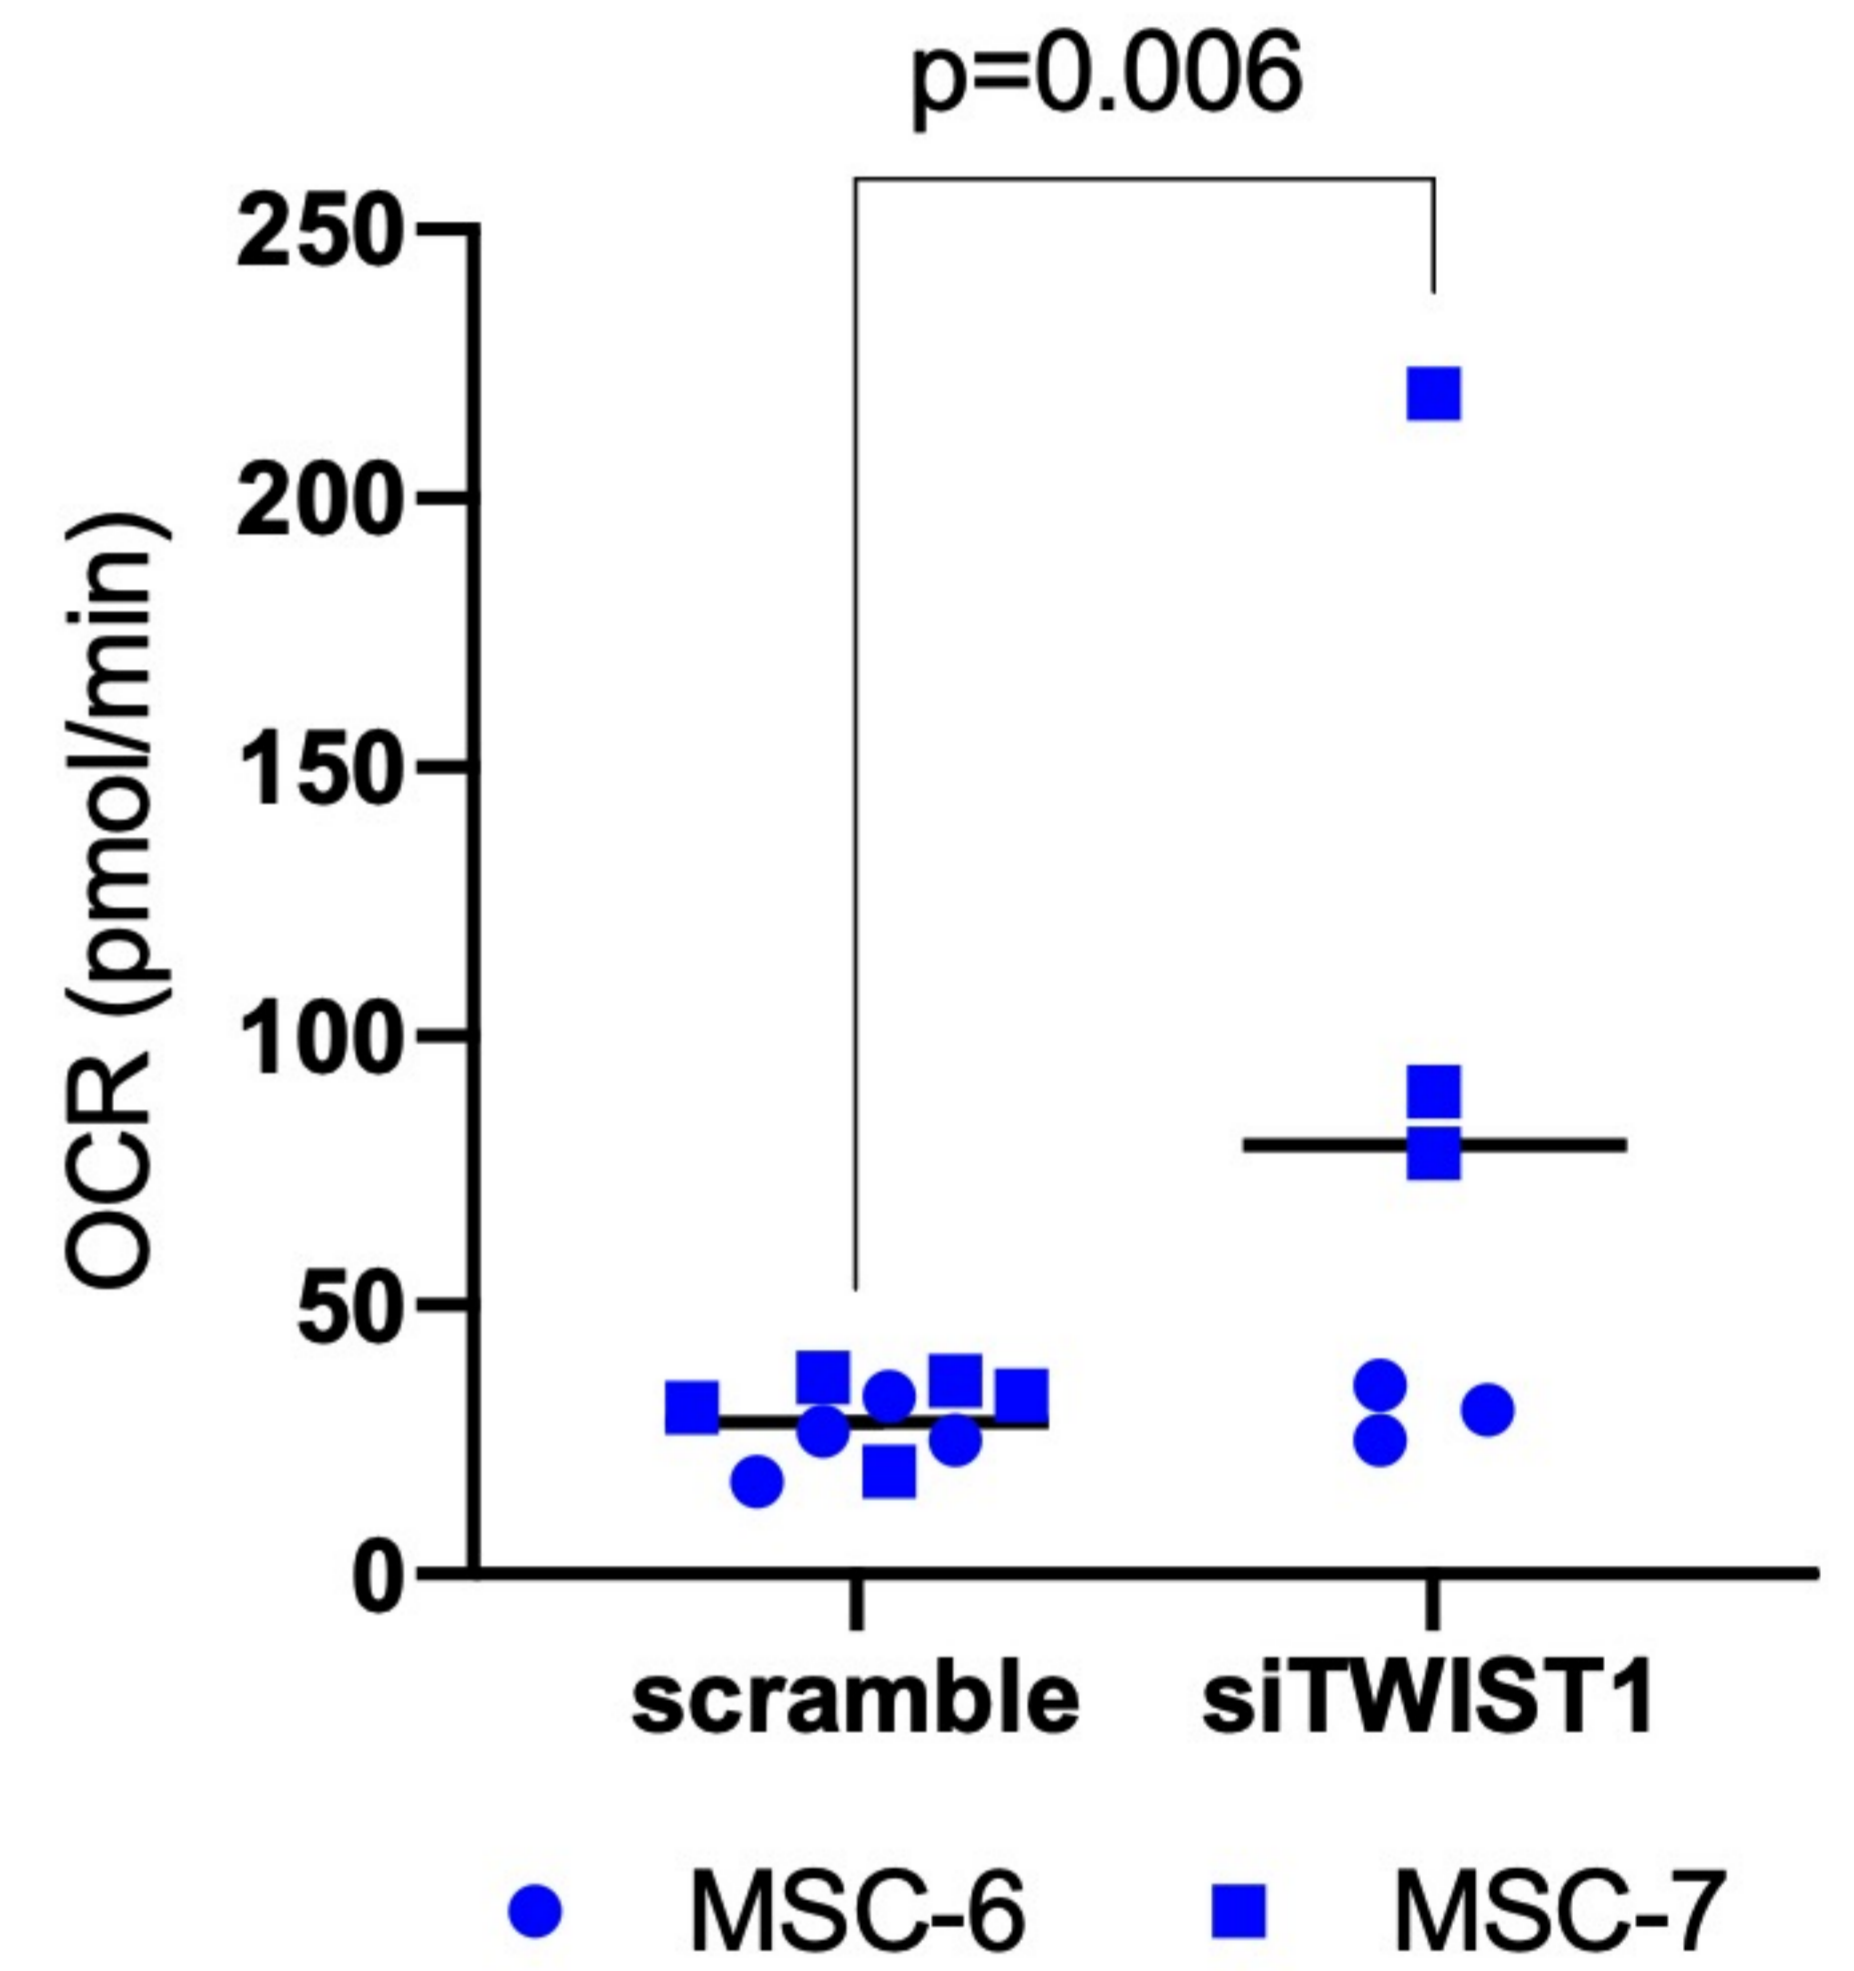

F

ATP production

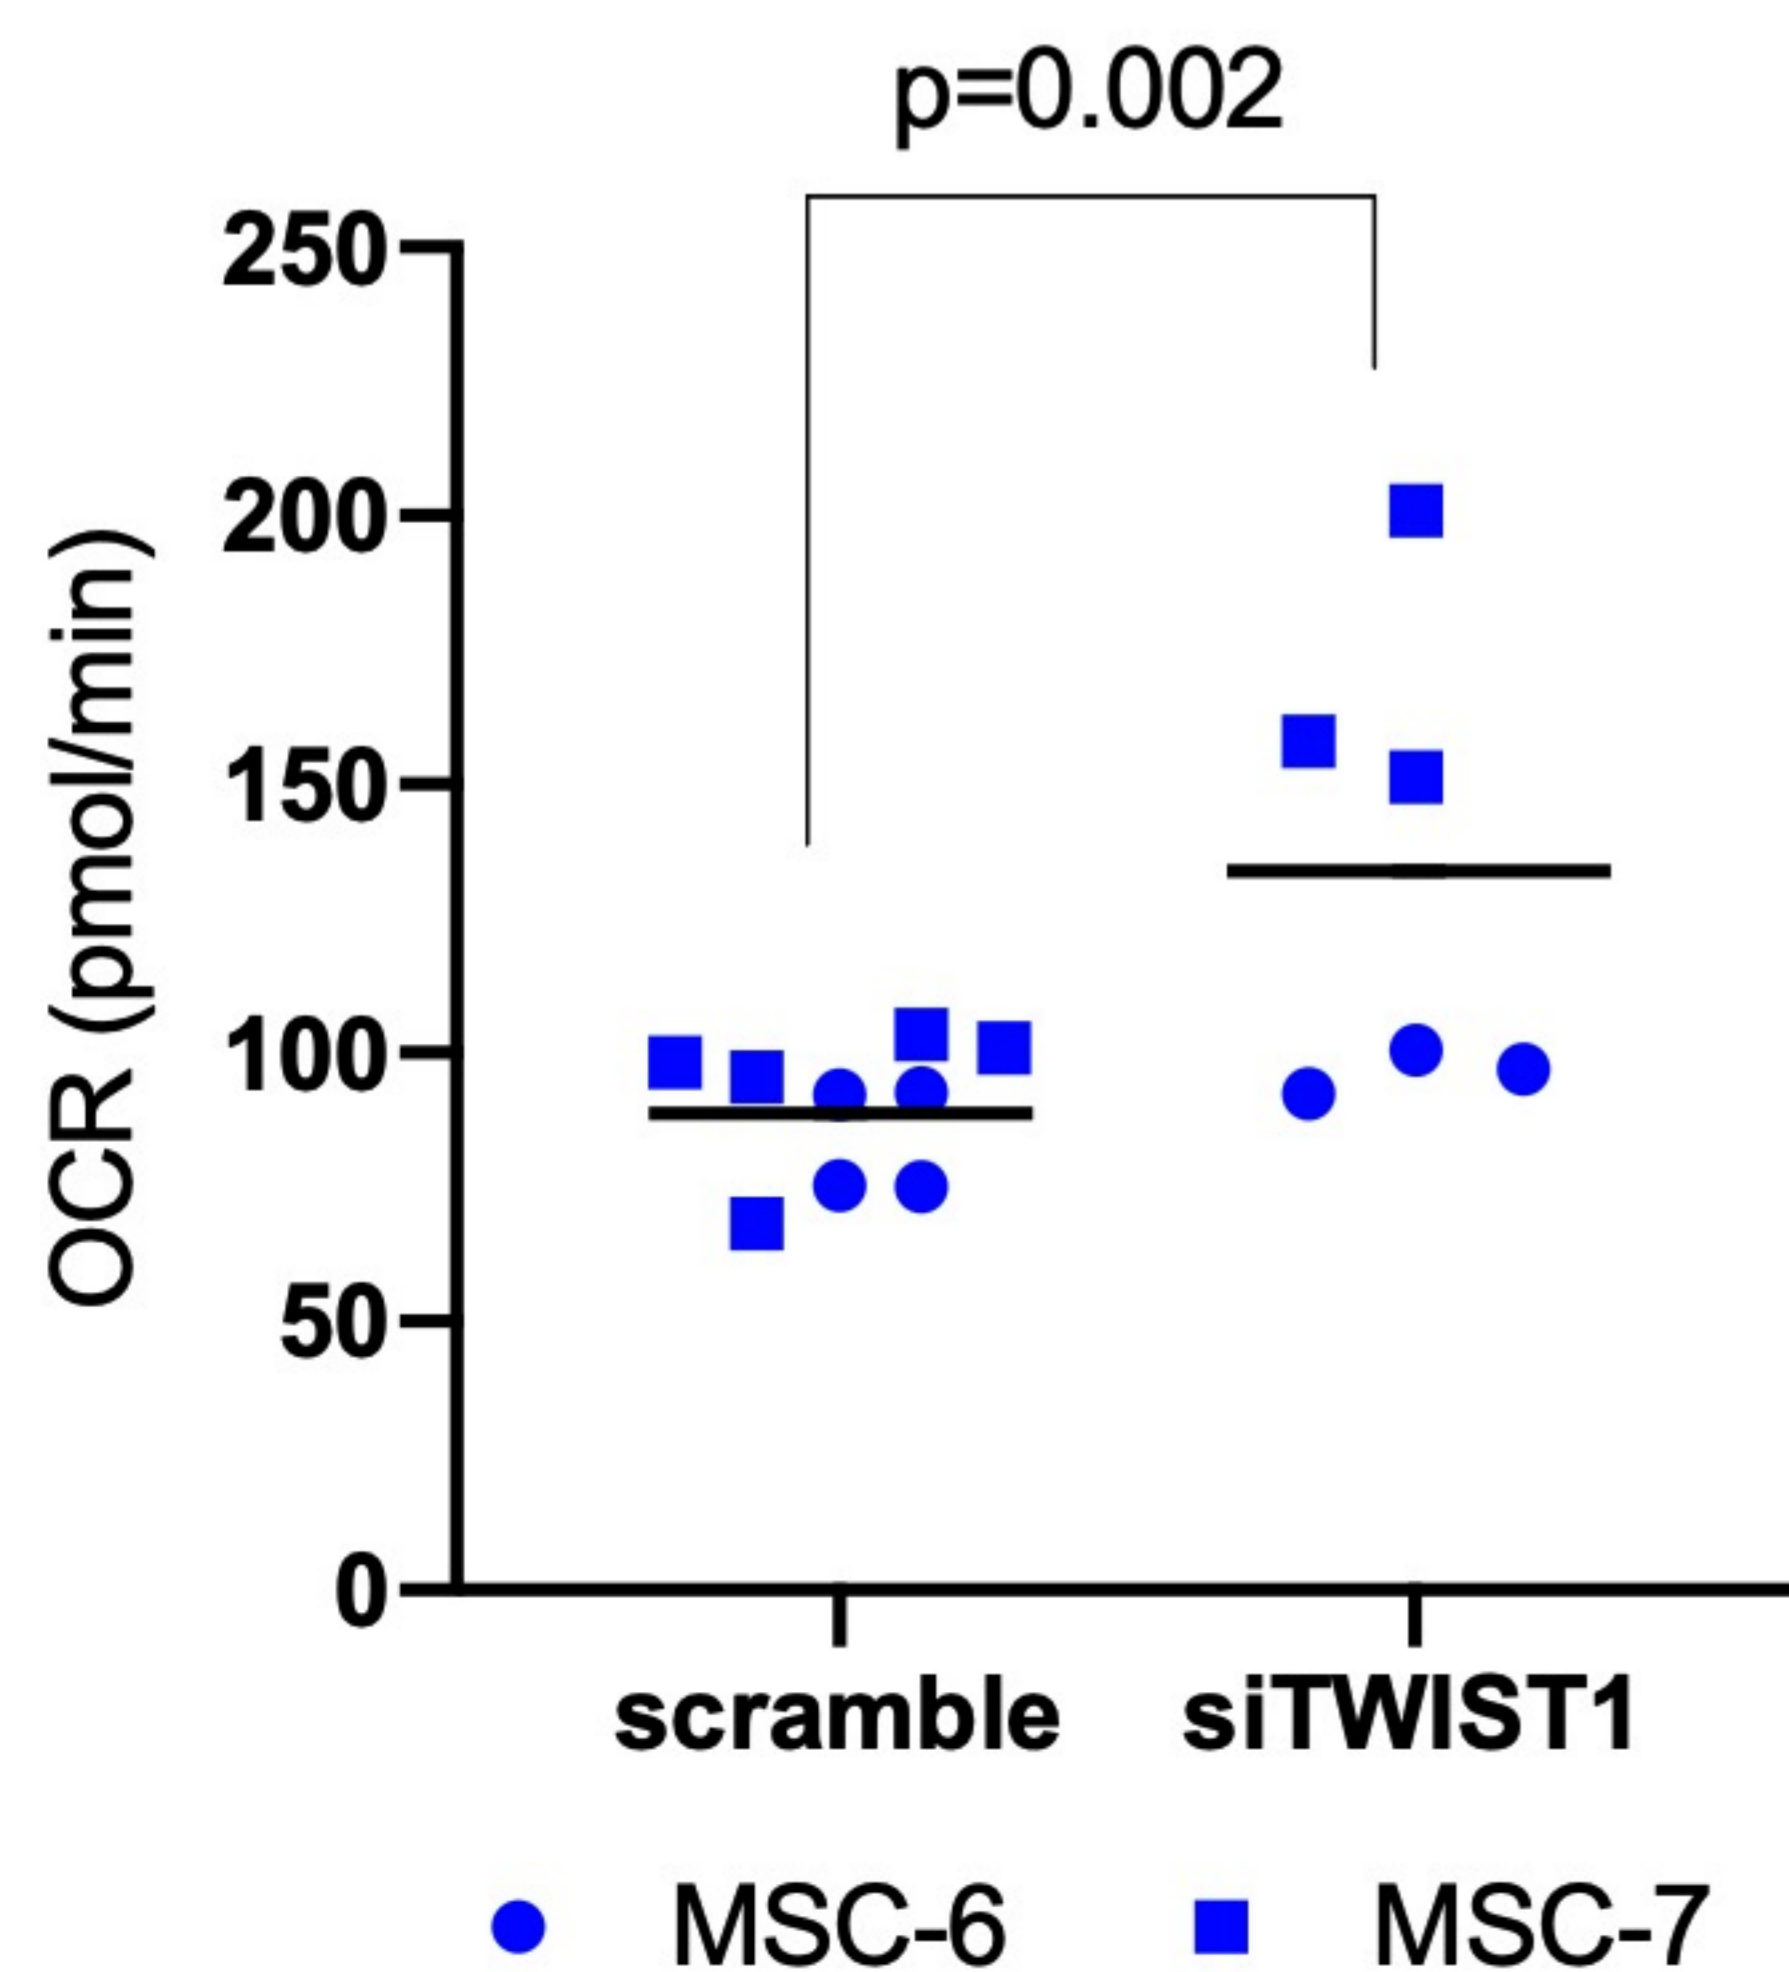

G

Spare capacity

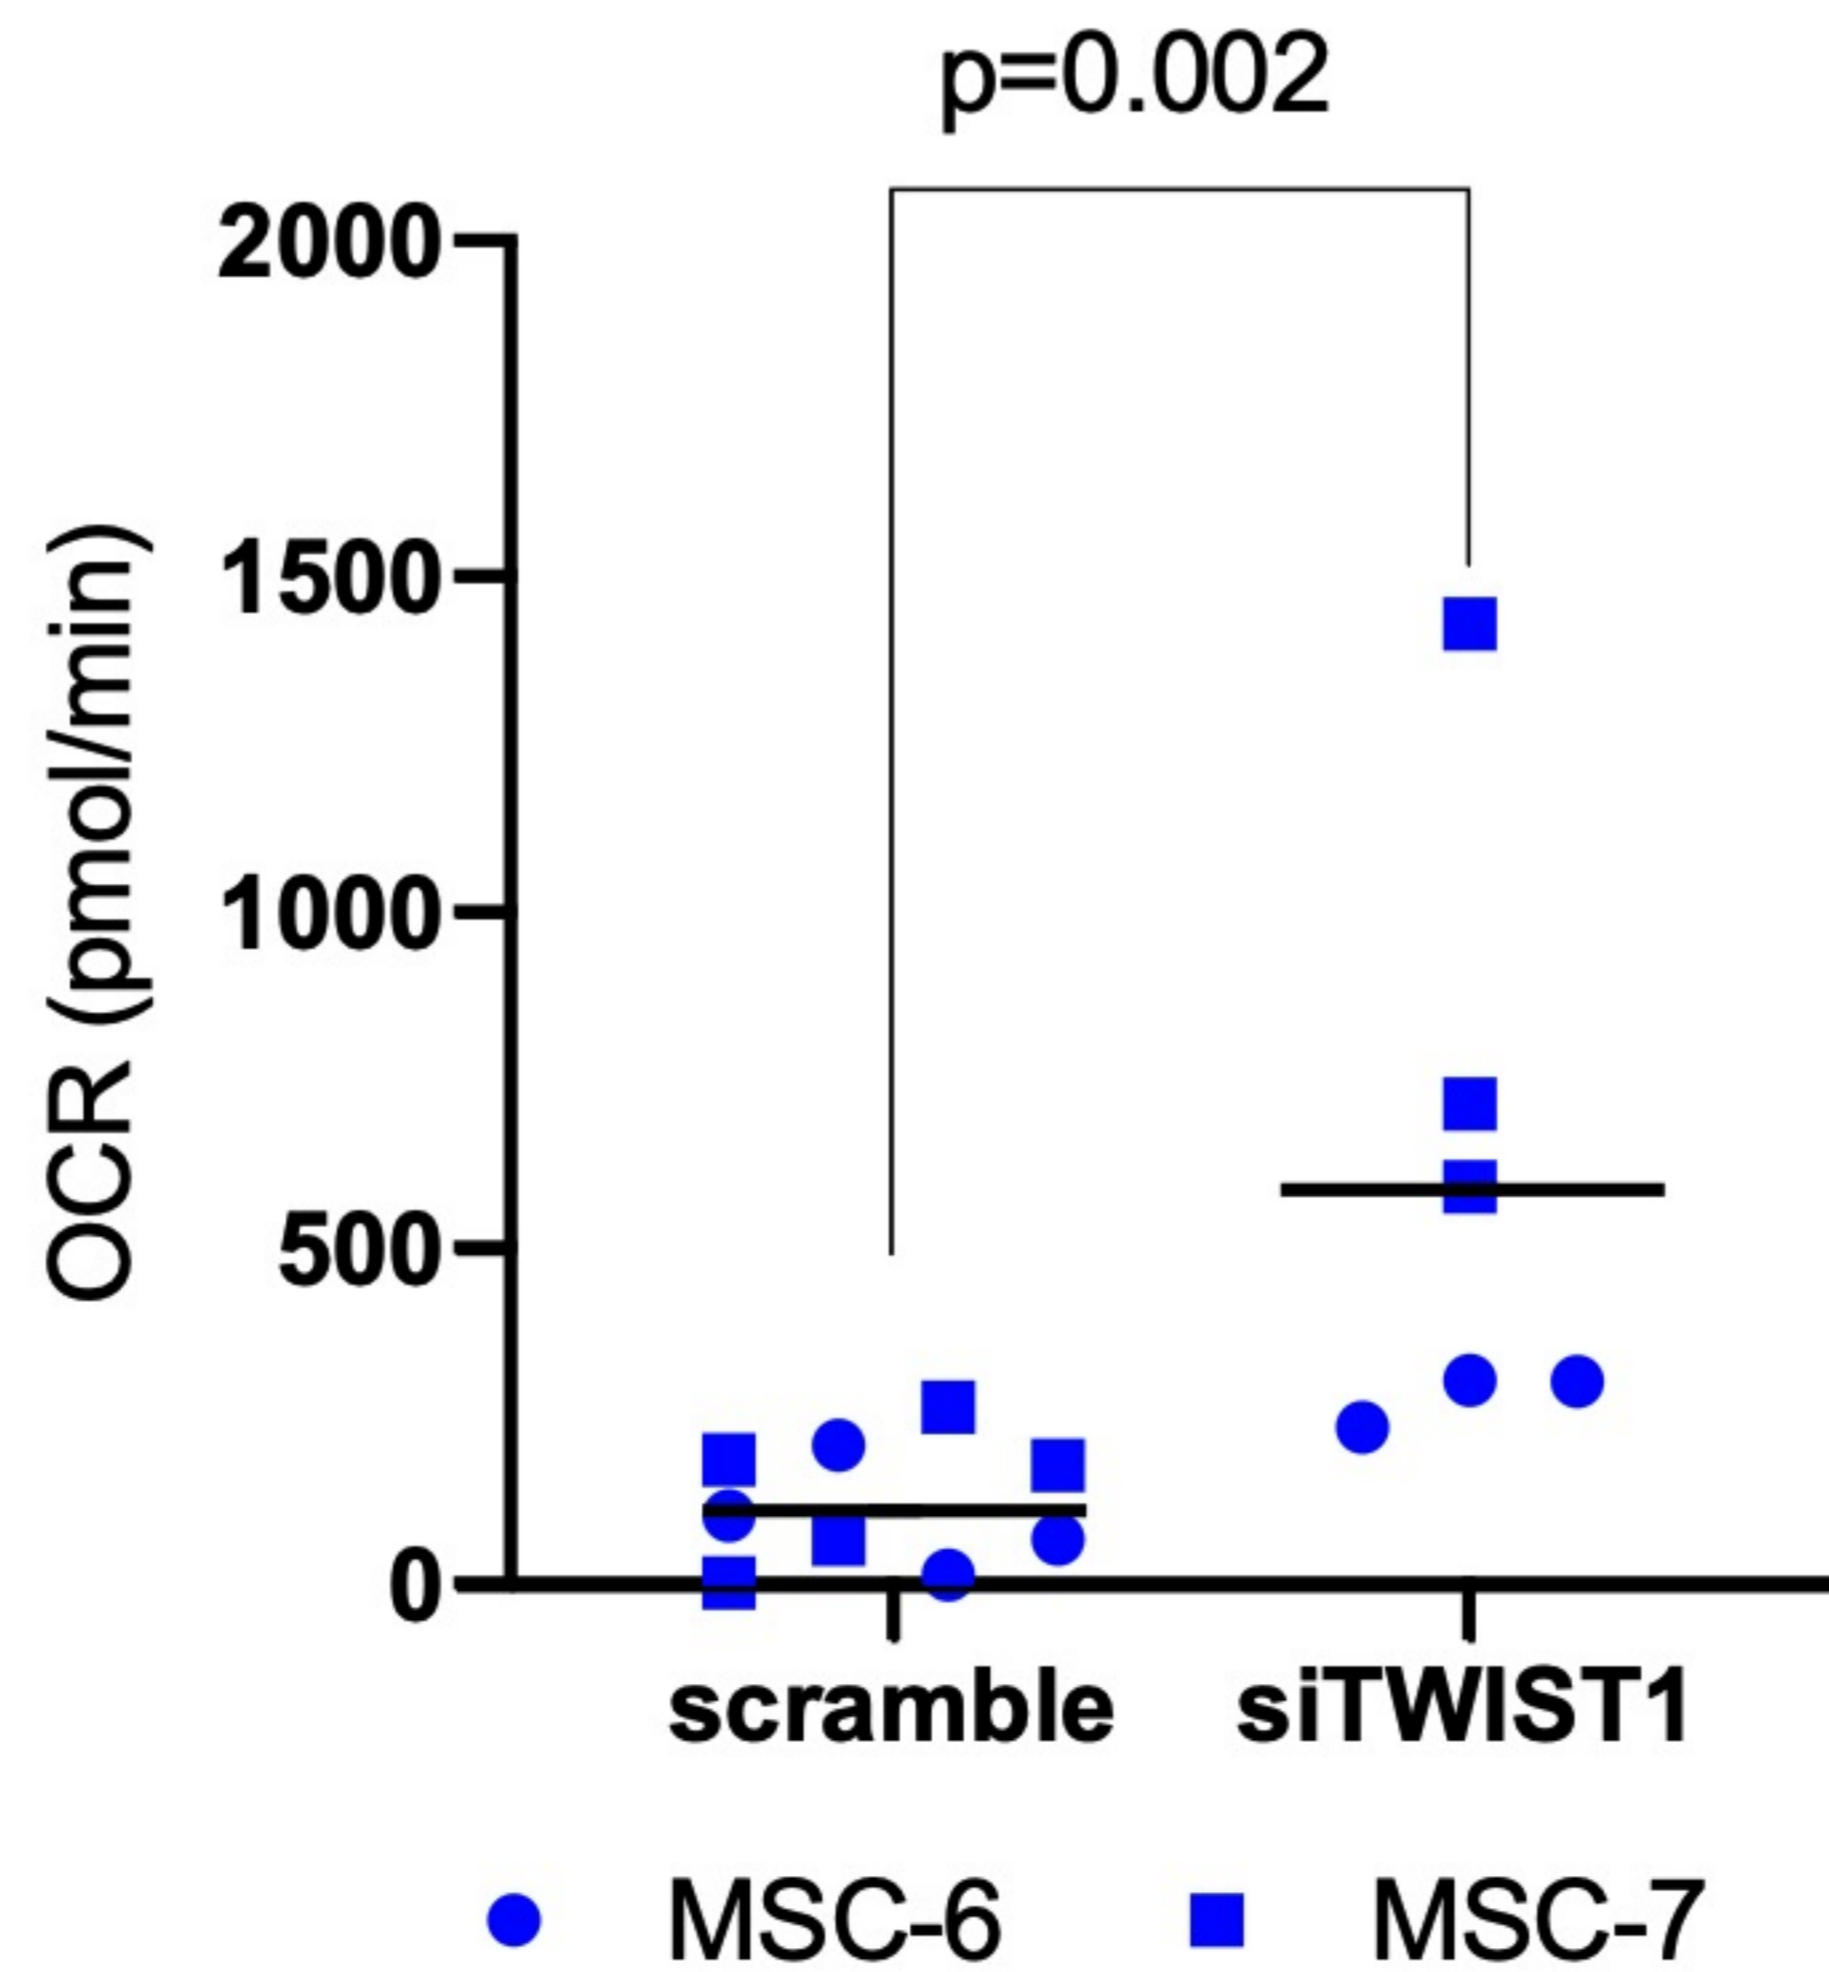

H

Nonmitochondrial respiration

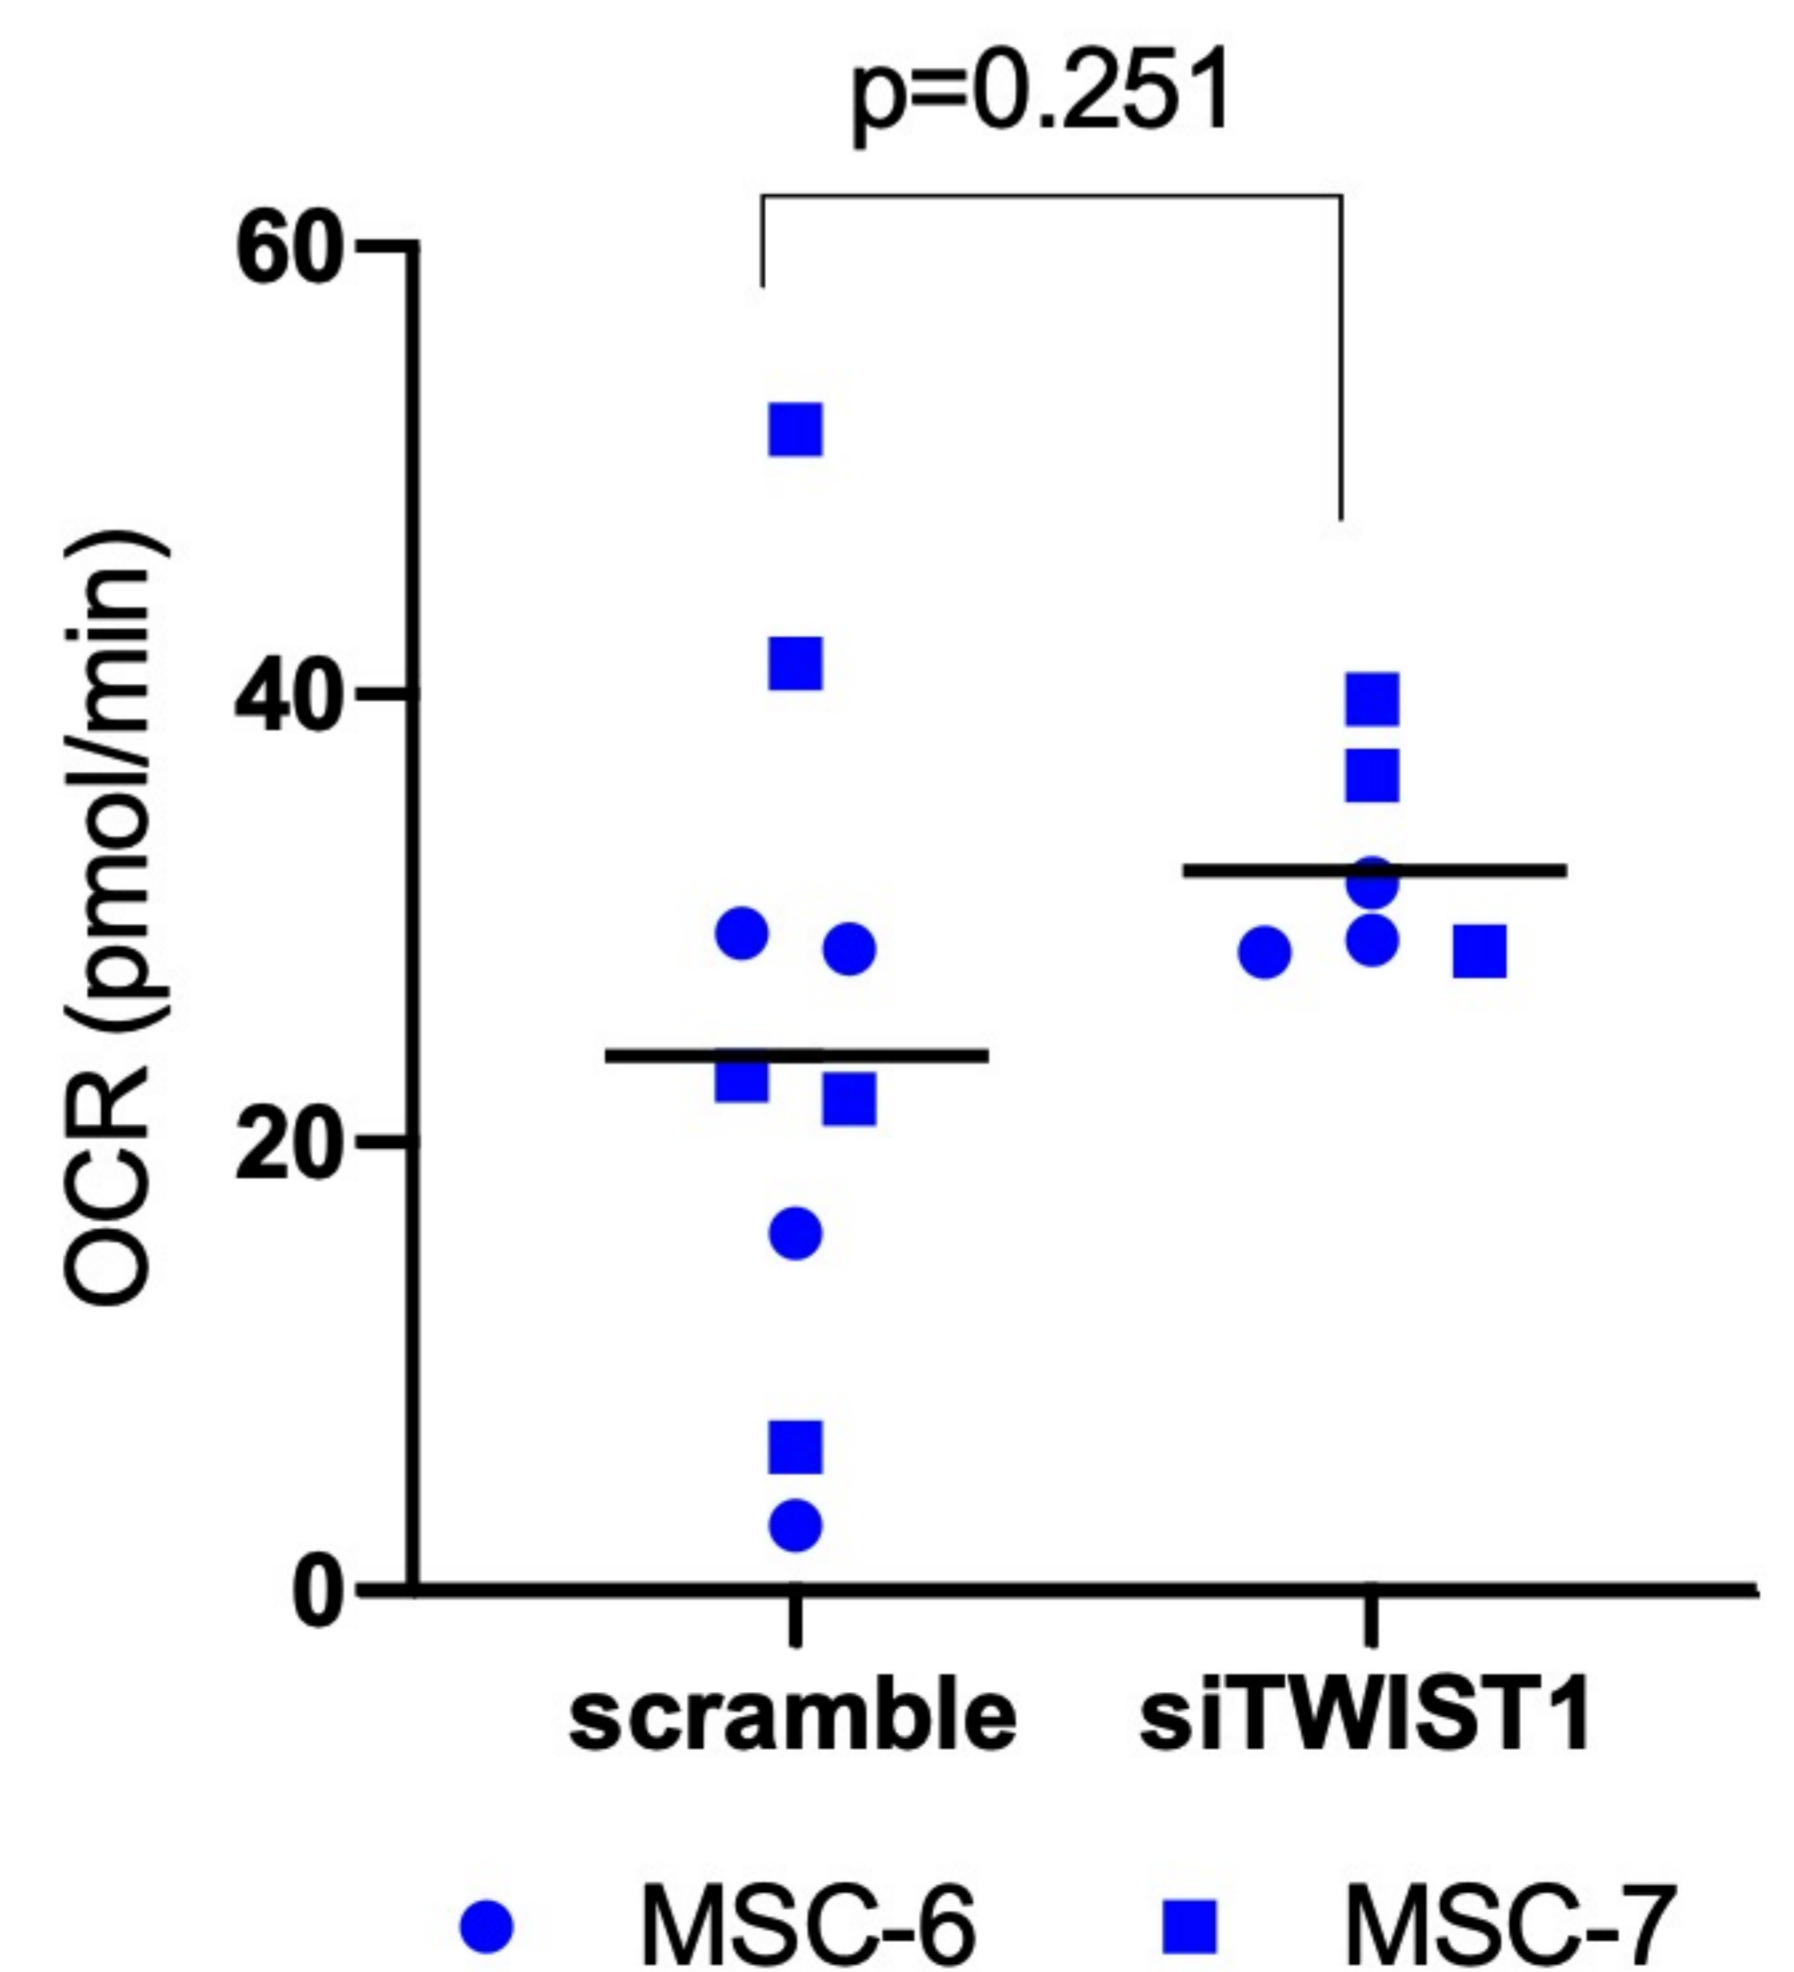



A

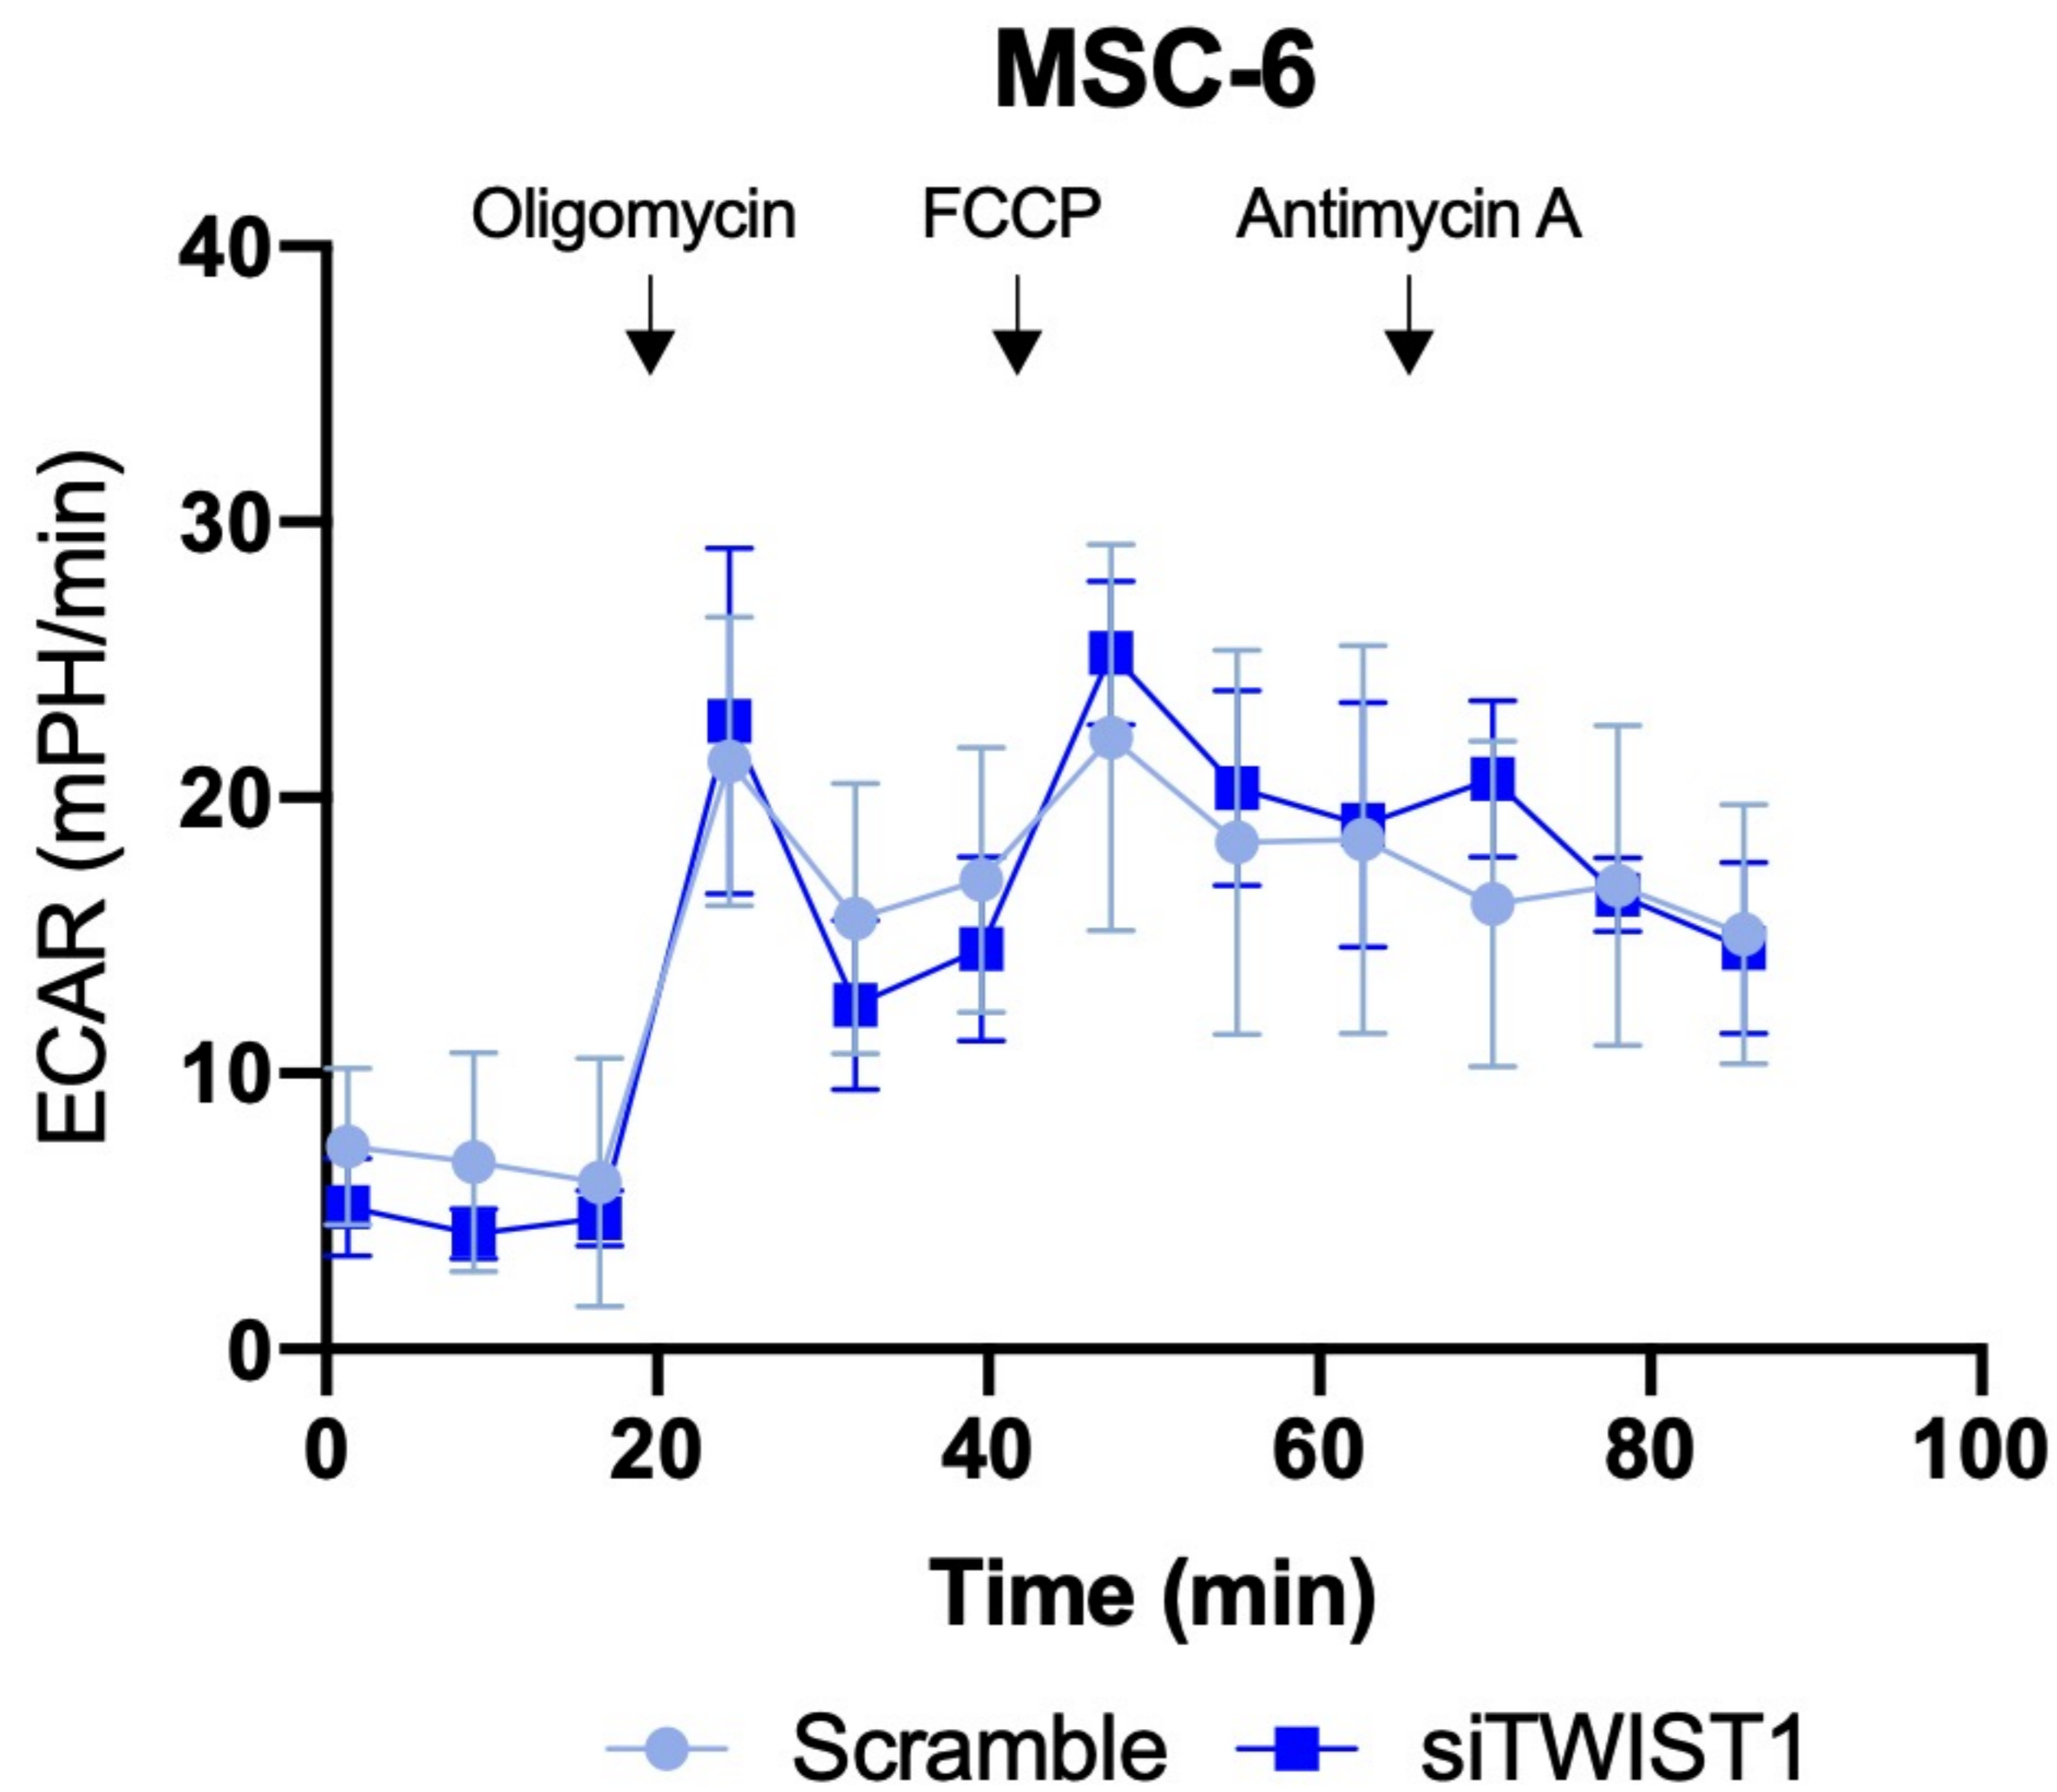

B

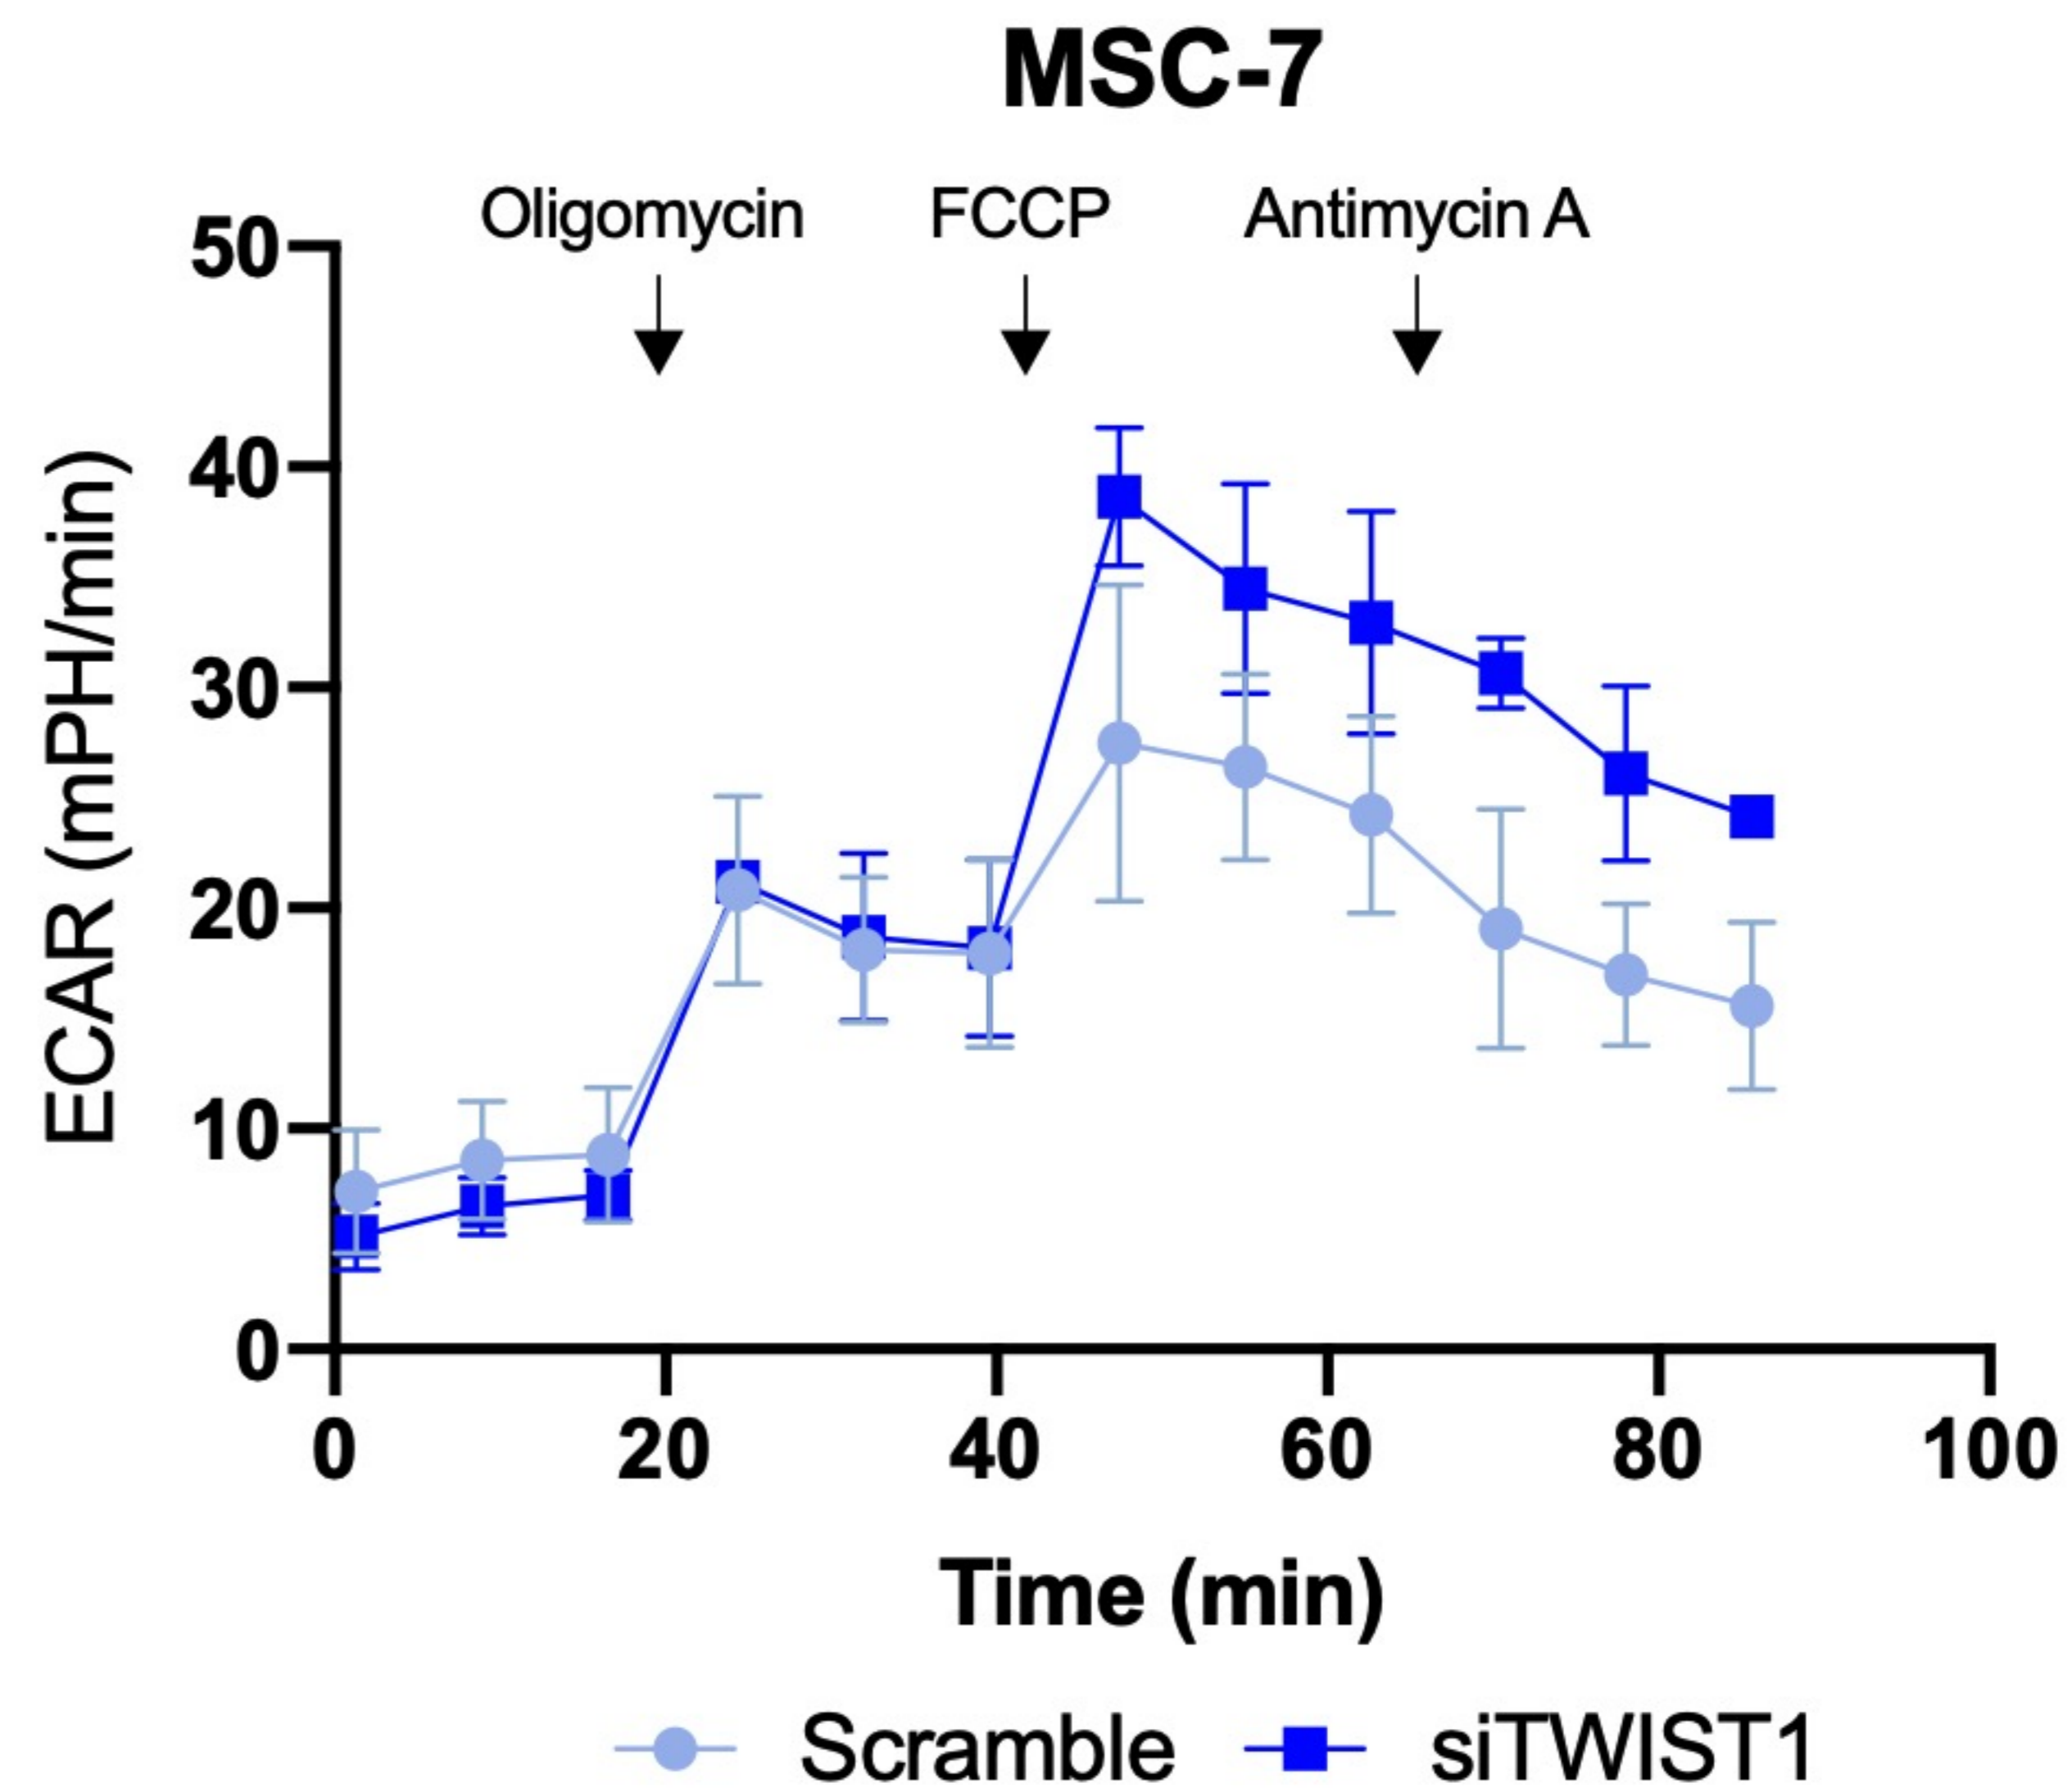

C

Basal OCR

Maximum OCR

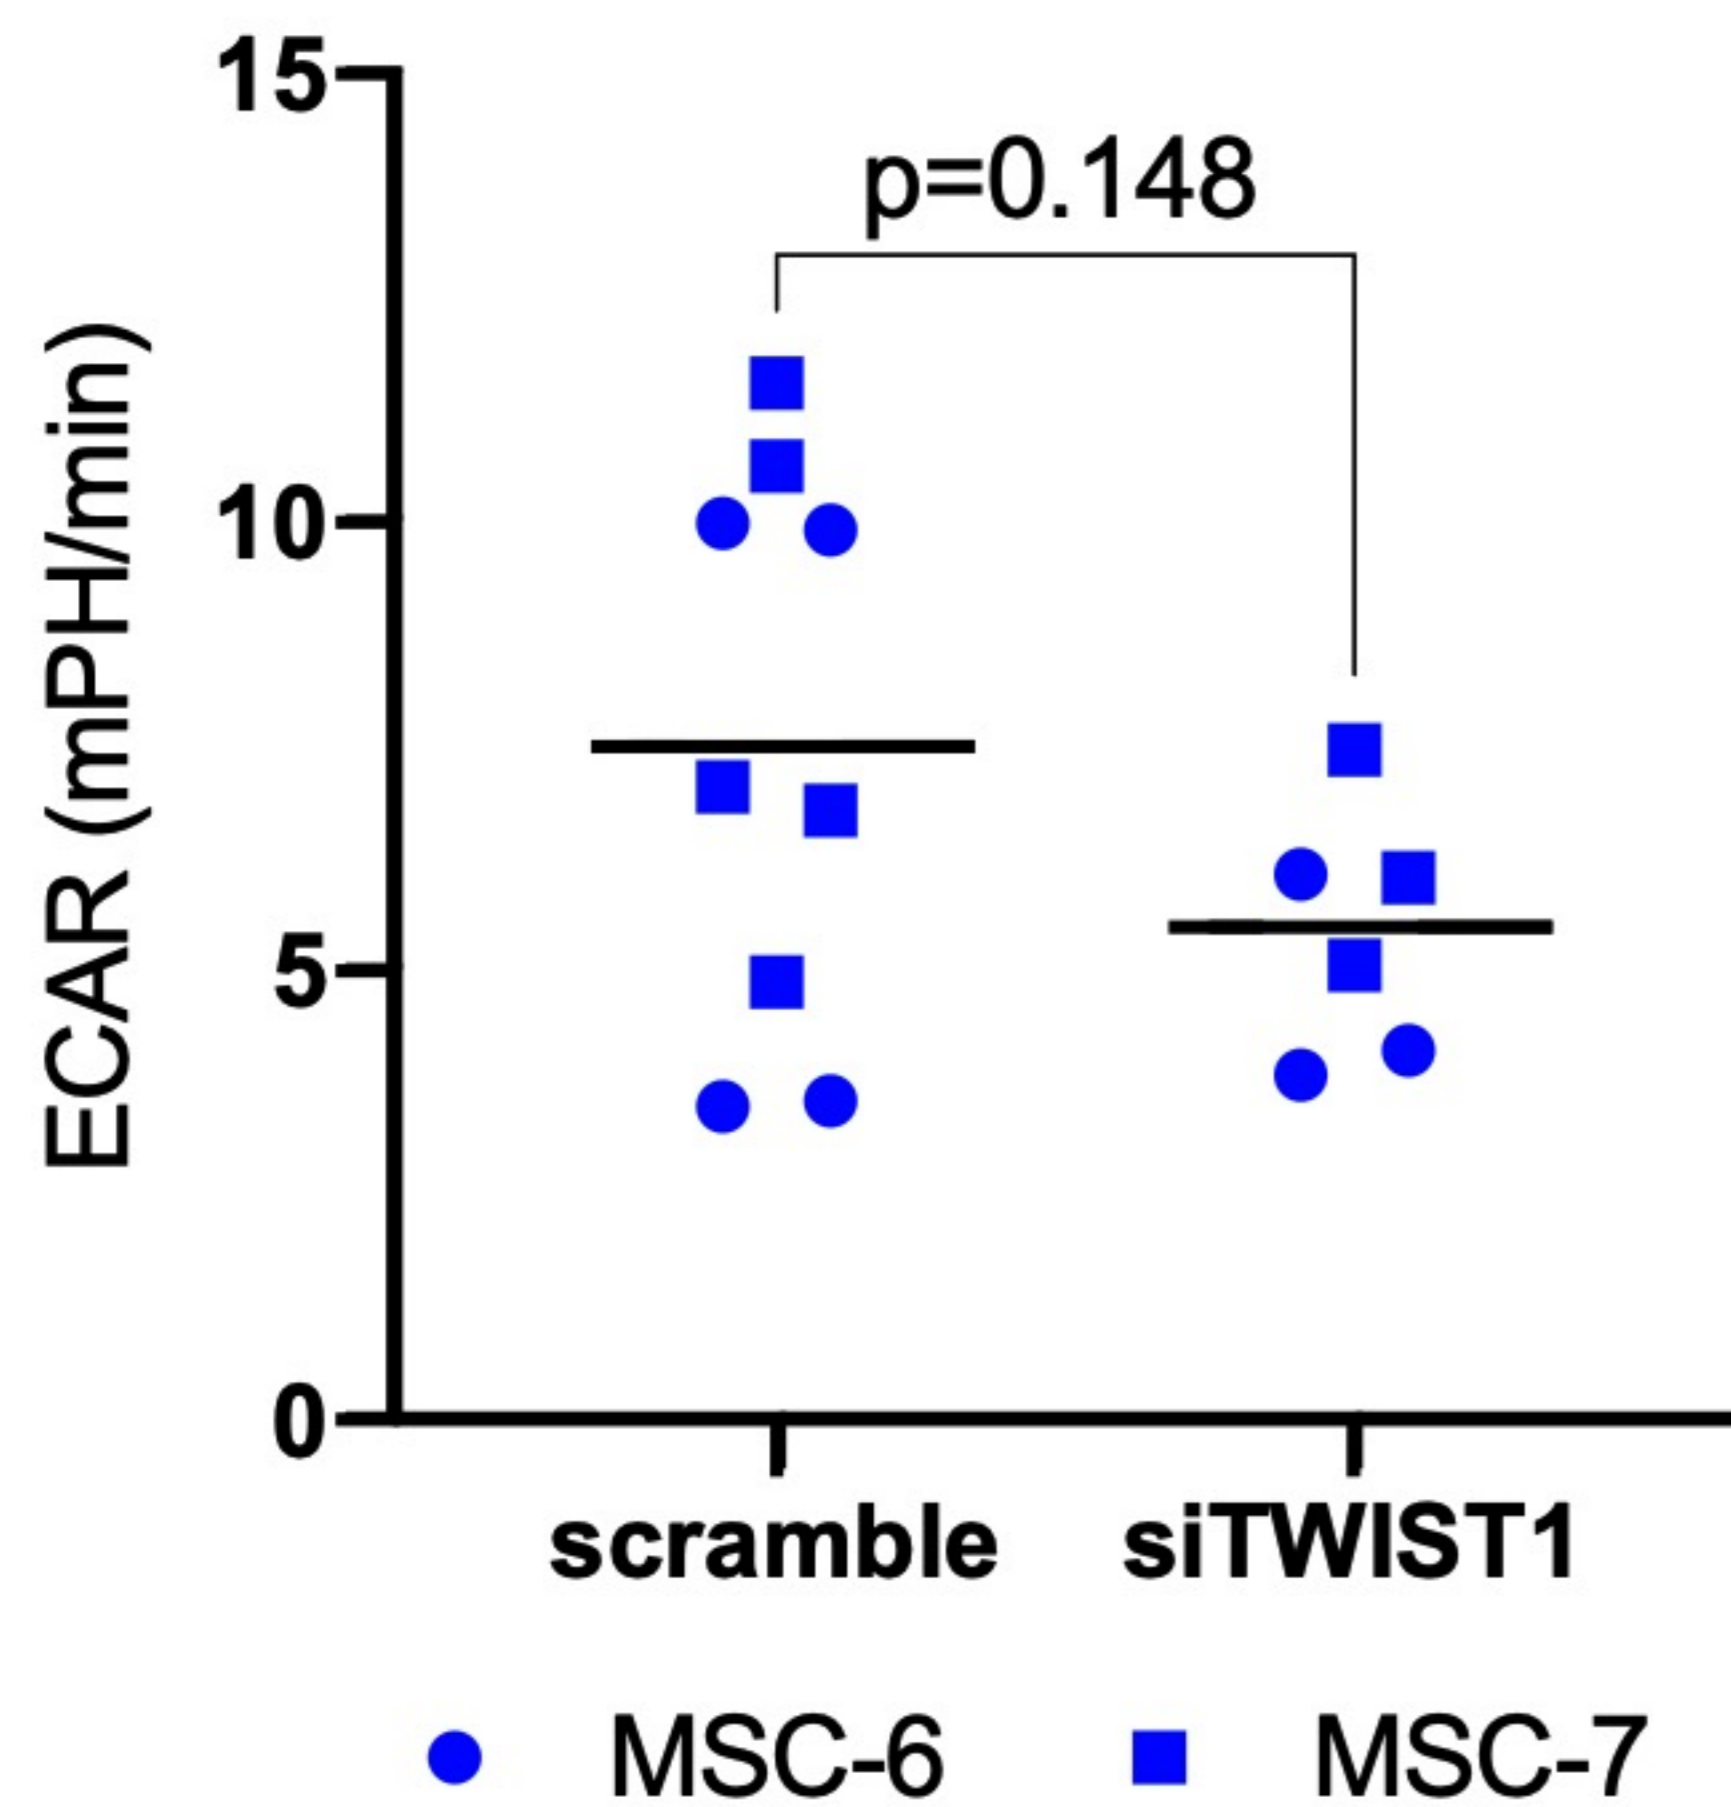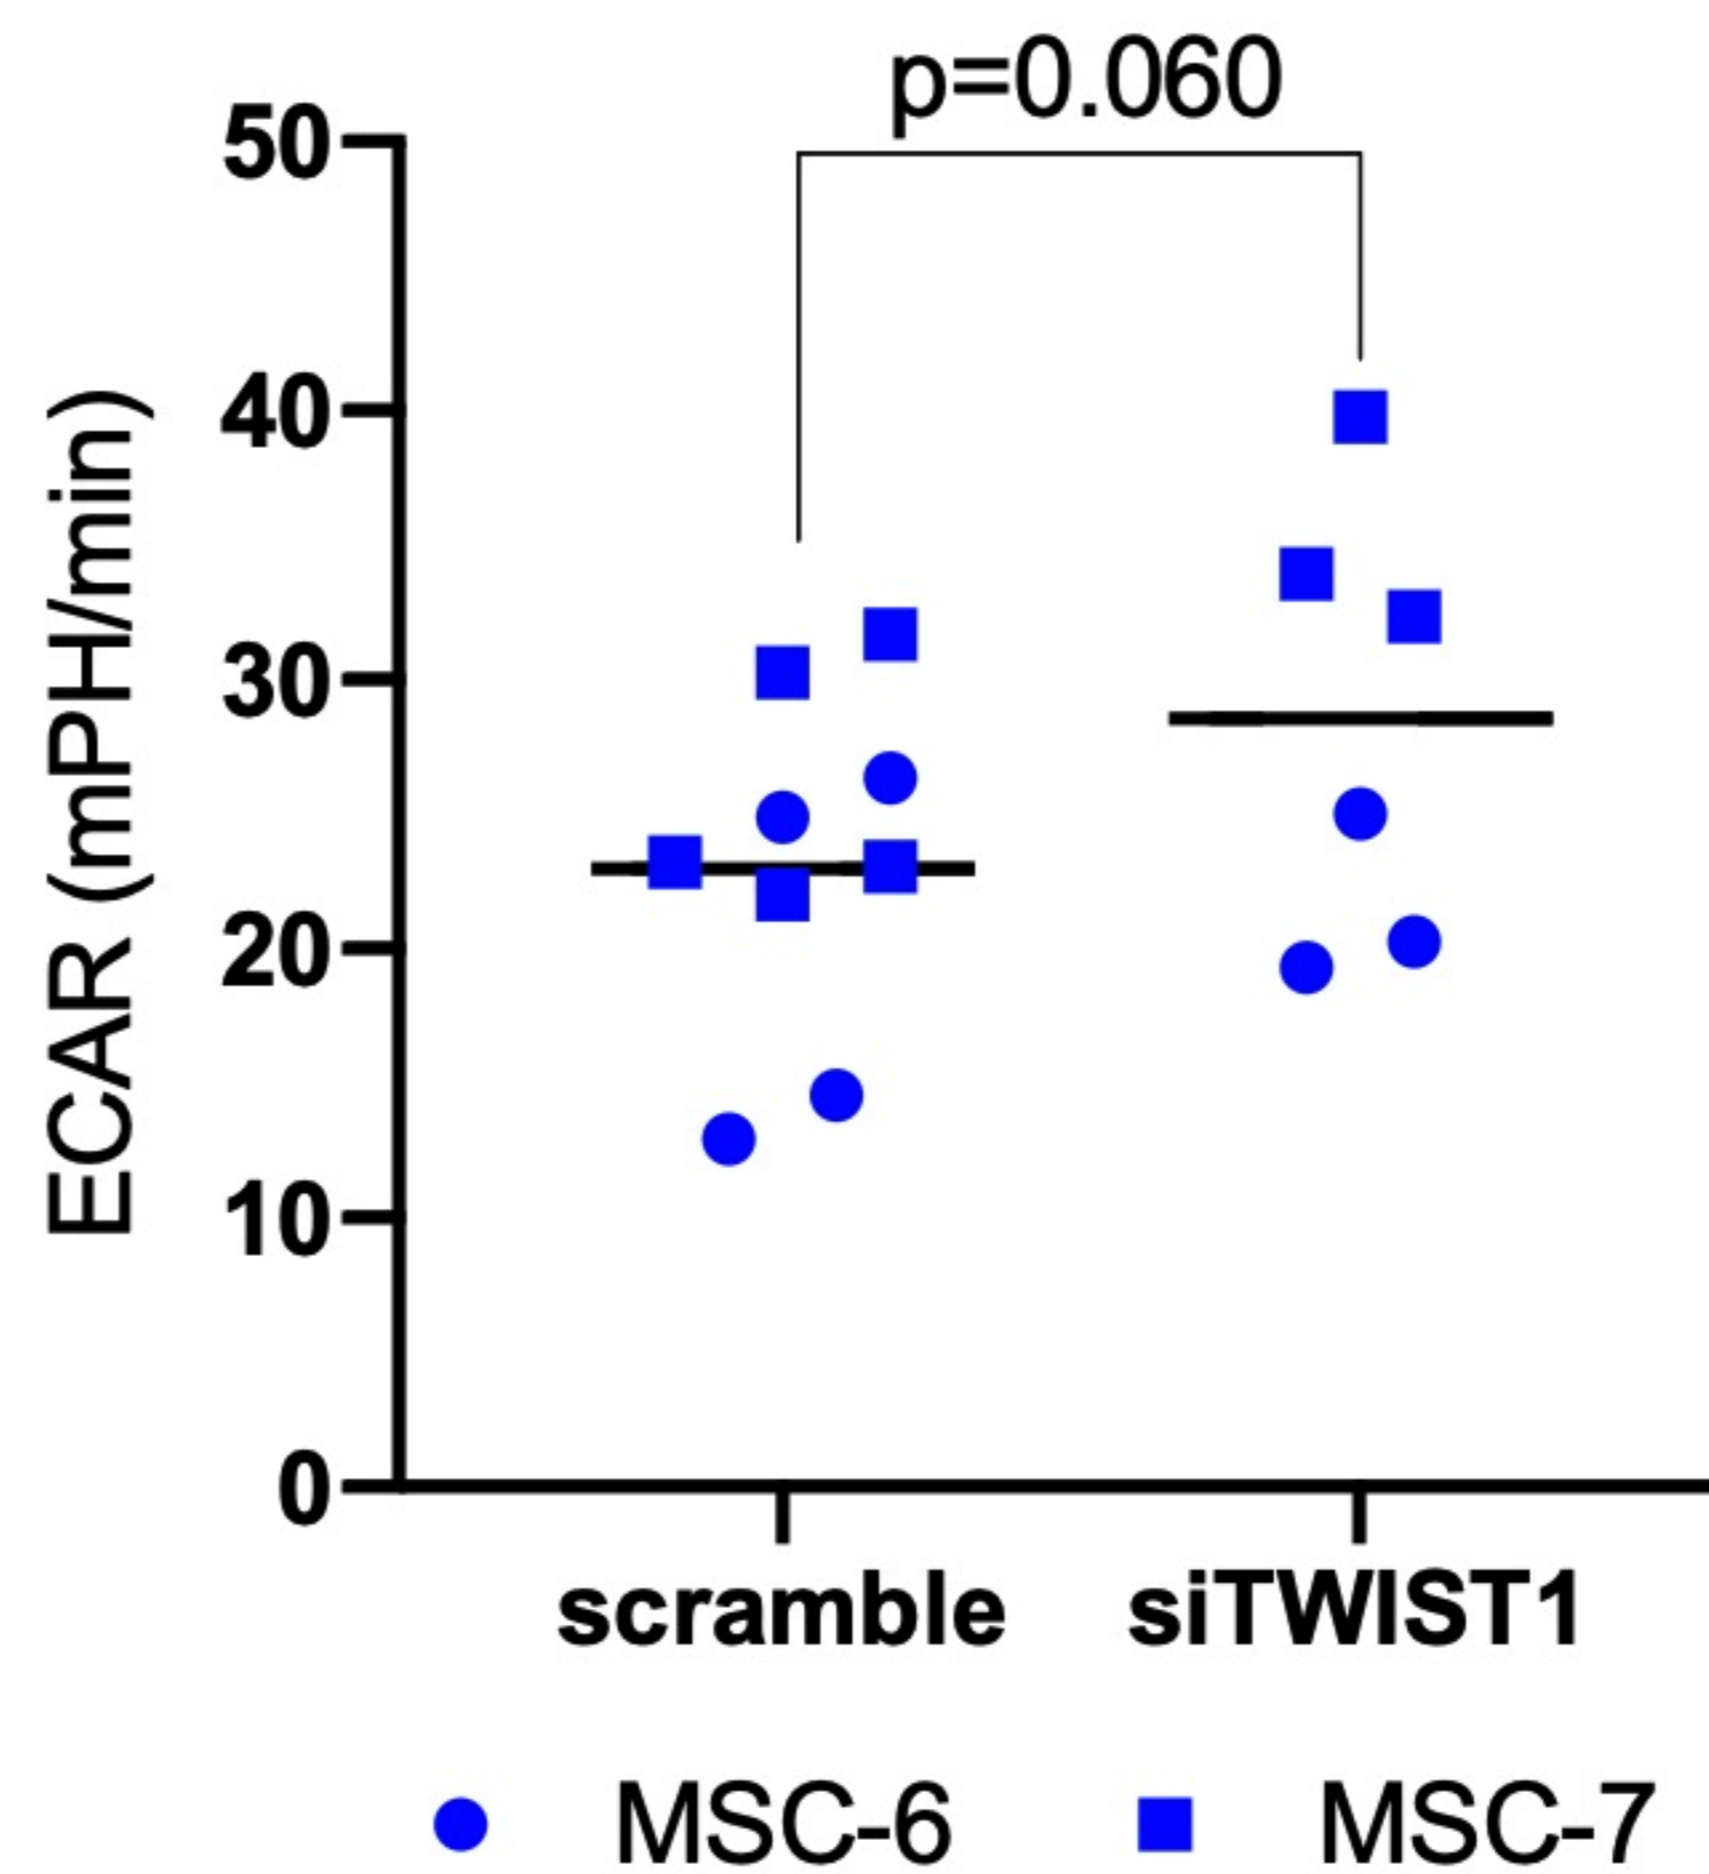

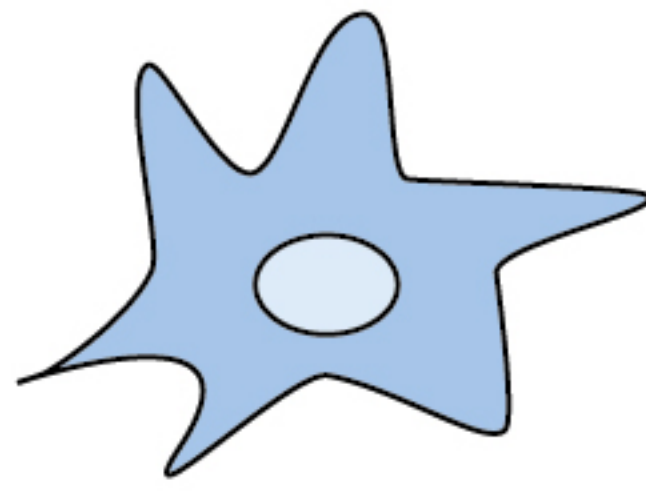

## *TWIST1*-silenced induced senescence

- *CCL2* and *IL1B* expression
- Increased respiration

- High SA- $\beta$ -Gal activity
- Growth arrest
- Increased expression of *P16* and *P21*

- Increased respiration
- Increased glycolytic flux
- Classical SASP expression

## Irradiation induced senescence

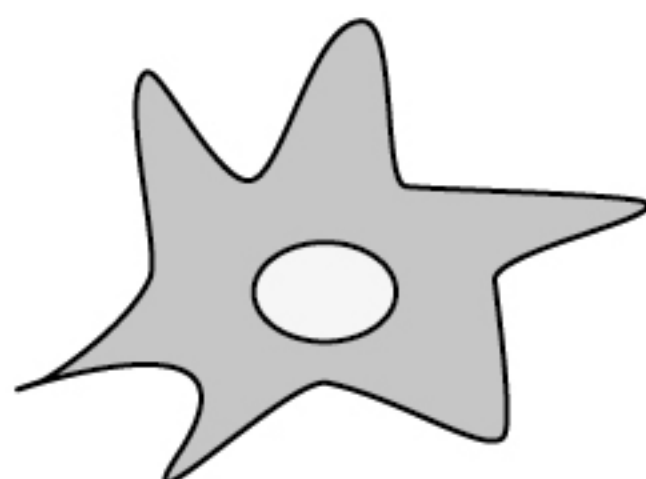

## Expanded view Figures

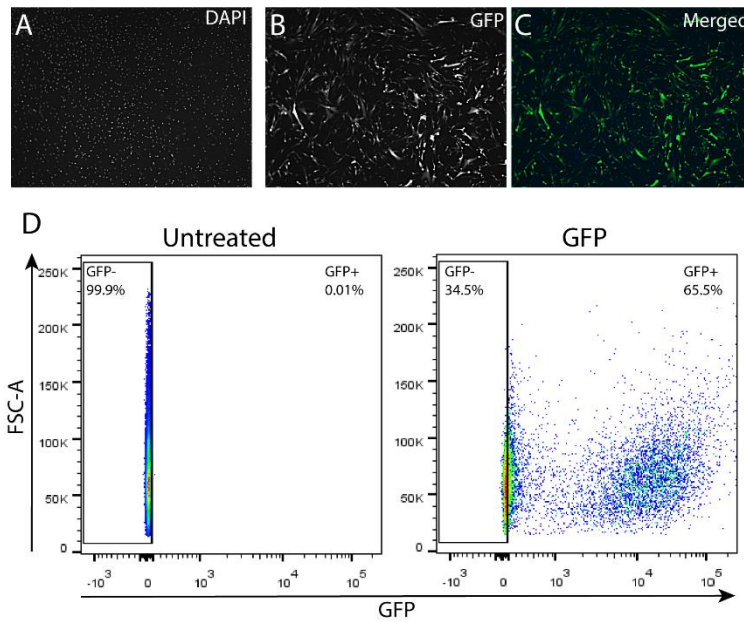

**Fig EV1. Related to Fig1. More than 65% of the MSCs were transduced using a GFP overexpression lentivirus.** (A-C) Representative fluorescent microscope images of GFP lentivirus transduced MSCs stained with DAPI (nuclei), N=1 donor. (D) Flowcytometry graphs of untreated MSCs and MSCs transduced with the GFP lentivirus, N=1 donor.

A

SA-B-gal quantification

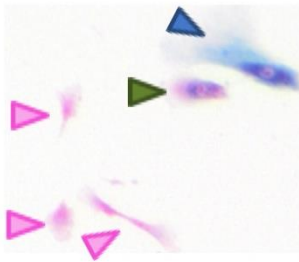

- ▶ Negative
- ▶ Low positive
- ▶ High positive

B

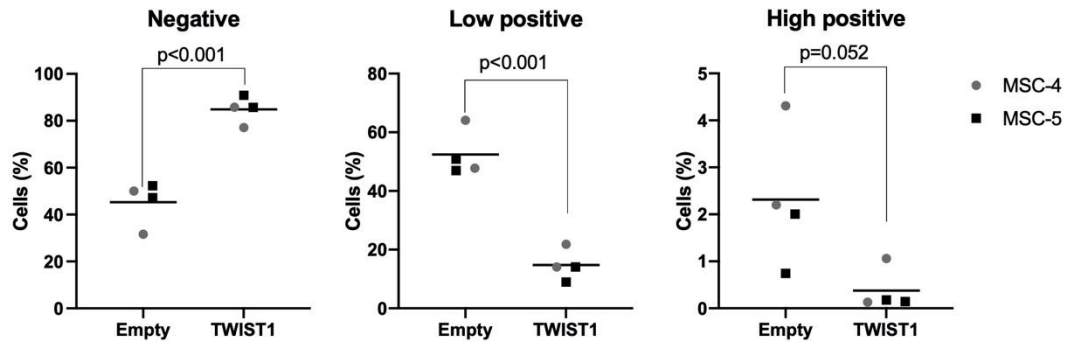

C

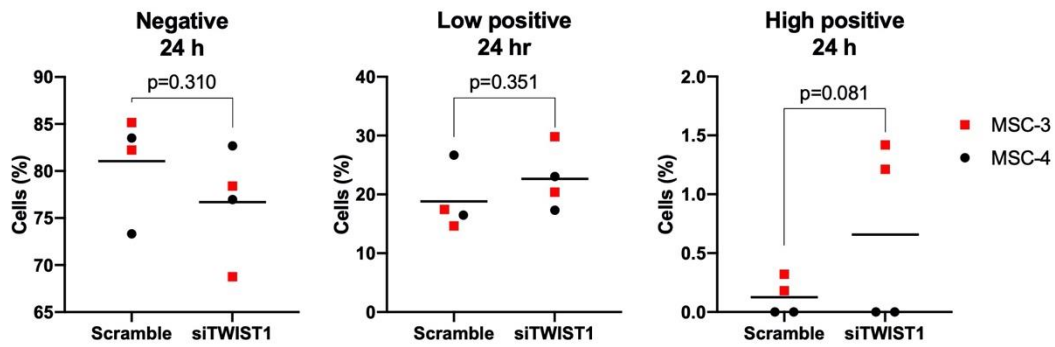

D

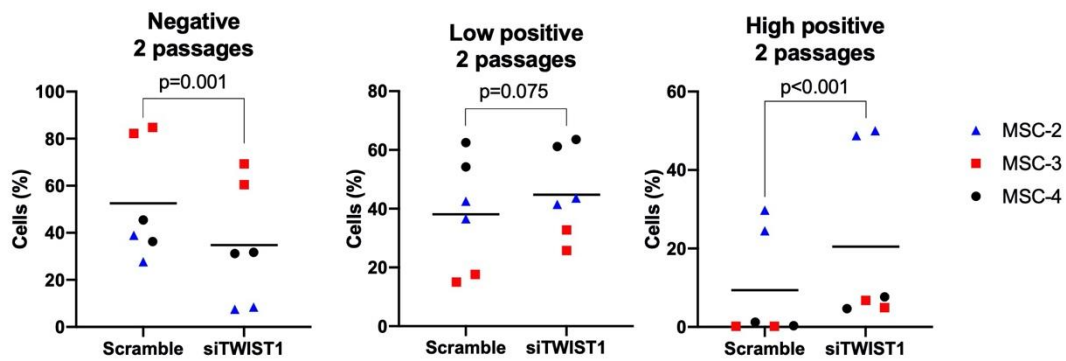

E

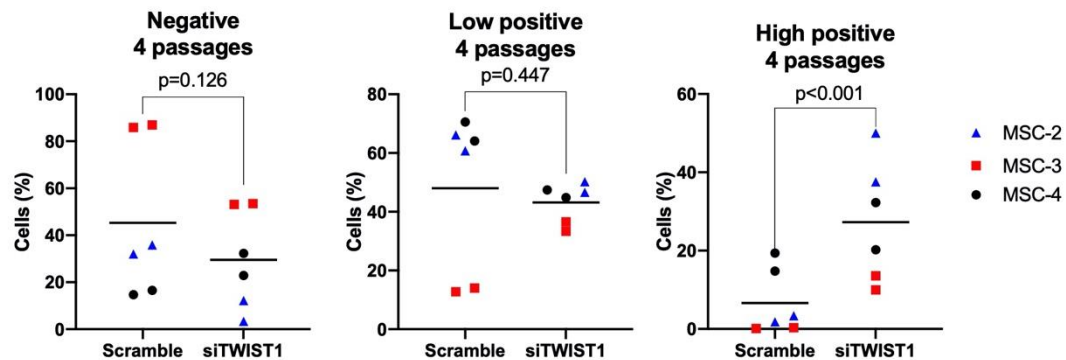

**Fig EV2. Related to Fig1 and Fig 2. Quantification of senescence-associated  $\beta$ -galactosidase**

**staining in low positive, high positive or negative cells.** (A) MSCs were categorized as negative for senescence-associated  $\beta$ -galactosidase (SA- $\beta$ -gal) staining if no blue staining was detected in the cells (pink arrow). MSCs were categorized low positive for SA- $\beta$ -gal staining if cells show partial cytoplasmic staining (green arrow). MSCs were categorized as high positive for SA- $\beta$ -gal staining if cells showed complete cytoplasmic staining (blue arrow). (B) SA- $\beta$ -gal quantification of MSCs transduced with an empty overexpression lentiviral construct (Empty) or a TWIST1 overexpression lentiviral construct (TWIST1) after 11 days of expansion. N=4, 2 donors with 2 replicates per donor. (C-E) SA- $\beta$ -gal quantification of MSCs treated for 24 h (C), 2 passages (D) or 4 passages (E) with scramble siRNA (Scramble) or siRNA against TWIST1 (siTWIST1). N=4-6, 2-3 donors with 2 replicates per donor. (B-E) Graphs show individual data points and grand mean of percentage of SA- $\beta$ -gal negative (left), low positive (middle panel) and high positive (right panel) cells.

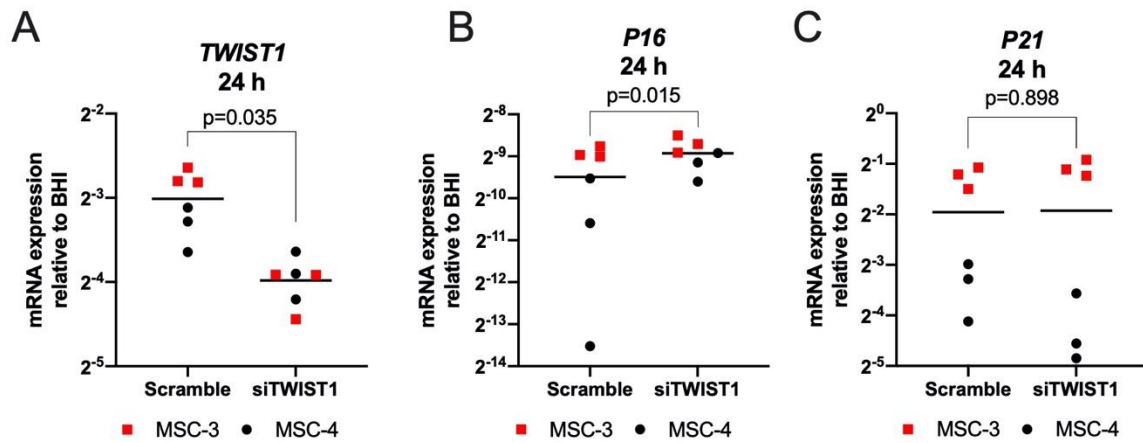

**Fig EV3. Related to Fig 2. Senescence markers after 24 h and 2 passages of *TWIST1***

**silencing in MSCs.** (A-C) *TWIST1* (A), *P16* (B), and *P21* (C) mRNA levels in MSCs treated for 24 h with scramble siRNA (Scramble) or siRNA against *TWIST1* (si*TWIST1*). N=6-9, 2-3 donors with 3 replicates per donor, linear mixed model. Graphs show individual data points and grand mean.

## A Mitochondrial stress test

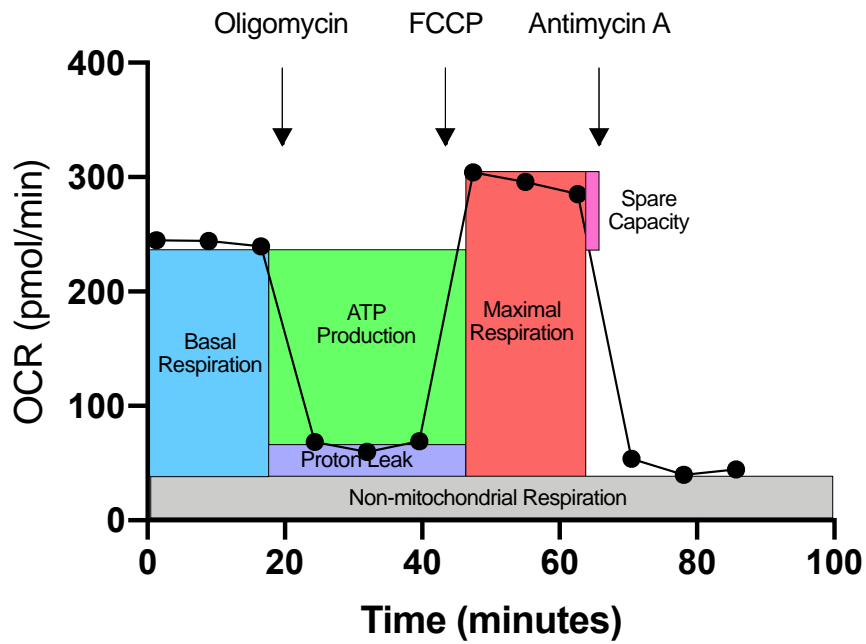

## B

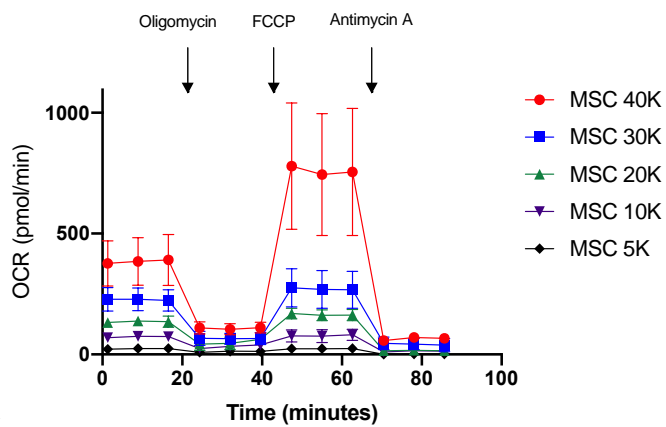

## C

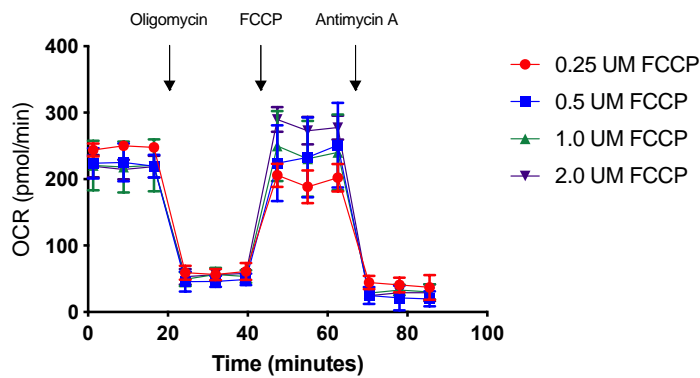



**Fig EV4. Related to Fig3. Optimization of the cell number and FCCP concentration for the mitochondrial stress test using Seahorse technology.** (A) The oxygen consumption rate (OCR) in MSCs was measured using Seahorse technology followed by subsequent measurements after injection of mitochondrial toxins: oligomycin, FCCP, and antimycin A. Using the mitochondrial stress test Basal OCR, ATP production, Maximum OCR, Spare capacity, Nonmitochondrial respiration and Proton leak were determined. (B) Mitochondrial stress test with different MSCs densities per well (5K, 10K, 20K, 30K and 40K) using 1.0  $\mu$ M FCCP. (C) Mitochondrial stress test with 30K MSCs per well using different concentrations FCCP (0.25, 0.5, 1.0 and 2.0  $\mu$ M). N=5-7, 1 donor with 5-7 replicates per donor. Graphs represent mean with SD.

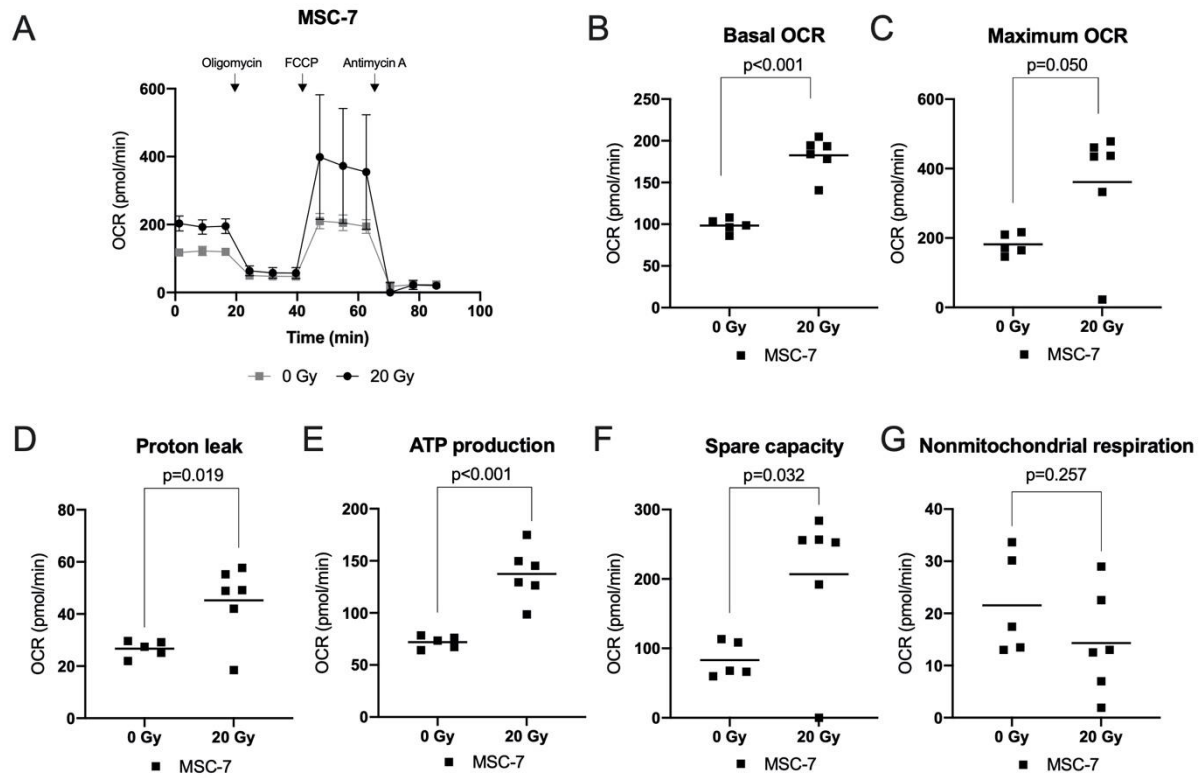

**Fig EV5. Related to Fig3. Increased oxygen consumption rate (OCR) in TWIST1 silenced**

**MSCs.** (A) Graph shows the OCR in MSCs irradiated with 0 or 20 Gy after addition of oligomycin, FCCP and antimycin A. Values represent mean with SD, N=5-6 replicates. (B-G) Graphs show calculated values for basal OCR (B), maximum OCR (C), proton leak (D), ATP production (E), spare capacity (F) and non-mitochondrial respiration (G) in MSCs irradiated with 0 or 20 Gy. N=5-6 replicates, unpaired t-test. Graphs show individual data points and mean.

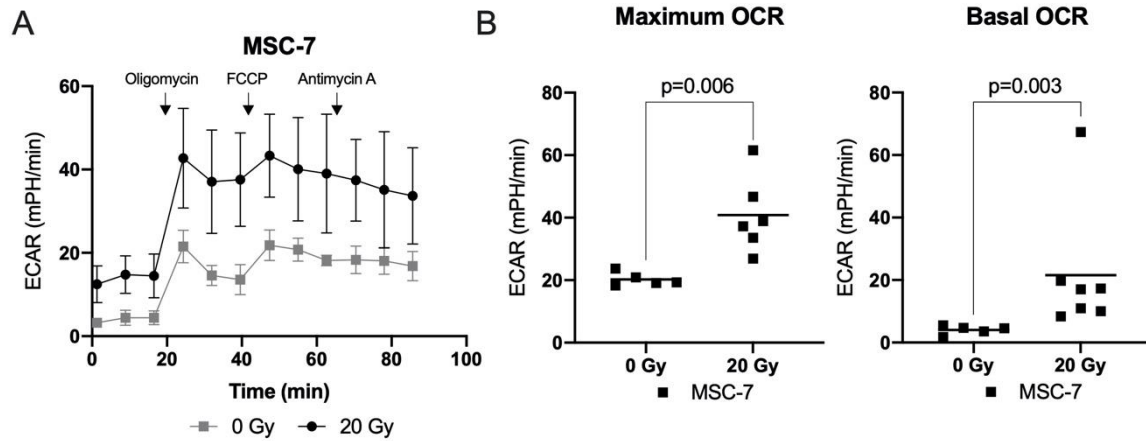

**Fig EV6.**Related to Fig4. Increased extracellular acidification rate (ECAR) in irradiated MSCs.

(A) Graph shows the ECAR in MSCs irradiated with 0 or 20 Gy after addition of oligomycin, FCCP and antimycin A. Values represent mean with SD, N=5-6 replicates. (B) Graphs show ECAR values for basal OCR and maximum OCR in MSCs irradiated with 0 or 20 Gy. N=5-6 replicates, unpaired t-test. Graphs show individual data points and mean

**Table EV1. Primer sequences**

| <b>Gene</b>   | <b>Forward</b>                  | <b>Reverse</b>                  | <b>Type of chemistry</b> |
|---------------|---------------------------------|---------------------------------|--------------------------|
| <i>TWIST1</i> | 5'-GTCCGCAGTCTTACGAGGAG-3'      | 5'-CCAGCTTGAGGGTCTGAATC-3'      | SYBR Green               |
| <i>GAPDH</i>  | 5'-ATGGGGAAGGTGAAGGTC G-3'      | 5'-TAAAAGCAGCCCTGGTGACC-3'      | TaqMan                   |
| <i>HPRT1</i>  | 5'-TTATGGACAGGACTGAACGTCTTG-3'  | 5'-GCACACAGAGGGCTACCATGTG-3'    | TaqMan                   |
| <i>RPS27A</i> | 5'-TGGCTGTCCTGAAATATTATAAGGT-3' | 5'-CCCCAGCACCACATTCATCA-3'      | SYBR Green               |
| <i>IL6</i>    | 5'-ACTCACCTCTTCAGAACGAATTG-3'   | 5'-CCATCTTTGGAAGGTTCAAGTTG-3'   | SYBR Green               |
| <i>IL8</i>    | 5'-TTTTTGAAGAGGGCTGAGAATTC-3'   | 5'-ATGAAGTGTGAAGTAGATTTGCTTG-3' | SYBR Green               |
| <i>P21</i>    | 5'-TGTCCTCAGGACCCATGC-3'        | 5'-AAAGTCGAAGTCCATCGCTC-3'      | SYBR Green               |
| <i>P16</i>    | 5'-ACCTGAGATGAGACAGGAGTC-3'     | 5'-ATGGAGCCTTCGGCTACT-3'        | SYBR Green               |
| <i>CCL2</i>   | 5'-GAGCCAGATGCAATCAATGCC-3'     | 5'-GGAATCCTGAACCCACTTCT-3'      | SYBR Green               |
| <i>IL1B</i>   | 5'-CCCTAAACAGATGAAGTGCTCCTT-3'  | 5'-GTAGTCGGATGCCGCCAT-3'        | SYBR Green               |
| <i>VEGFA</i>  | 5'-CTTGCCTTGCTGCTCTACC-3'       | 5'-CACACAGGATGGCTTGAAG-3'       | SYBR Green               |
| <i>MMP13</i>  | 5'-AAGGAGCATGGCGACTTCT-3'       | 5'-TGGCCCAGGAGGAAAAGC-3'        | TaqMan                   |
| <i>IL10</i>   | 5'-CCTGGAGGAGGTGATGCCCA-3'      | 5'-GACAGCGCCGTAGCCTCAGC-3'      | SYBR Green               |
